# Supplementary material
Source: PubMed Central journal article supplement (PMC2465813)
Supplement: NIHMS56361-supplement-1.pdf [file NIHMS56361-supplement-1.pdf]

## SUPPORTING INFORMATION

# Isotope Effects and the Mechanism of Epoxidation of Cyclohexenone with *tert*-Butylhydroperoxide

Chad Christian, Tetsuya Takeya, Michael J. Szymanski, and Daniel A. Singleton\*

*Department of Chemistry, Texas A&M University, PO Box 30012,  
College Station, Texas 77842*

|                                                                                                         |    |
|---------------------------------------------------------------------------------------------------------|----|
| Theoretical Structures.....                                                                             | 3  |
| Cyclohexenone – 6-31G* Gas Phase .....                                                                  | 3  |
| Cyclohexenone – 6-31+G** Gas Phase .....                                                                | 4  |
| Cyclohexenone – 6-31G* - PCM Dichloroethane.....                                                        | 4  |
| Cyclohexenone – 6-31+G** - PCM Dichloroethane .....                                                     | 5  |
| <i>t</i> -Butyl Hydroperoxide – 6-31G* Gas Phase .....                                                  | 5  |
| <i>t</i> -Butyl Hydroperoxide – 6-31+G** Gas Phase.....                                                 | 6  |
| <i>t</i> -Butyl Hydroperoxide – 6-31G* - PCM Dichloroethane.....                                        | 6  |
| <i>t</i> -Butyl Hydroperoxide – 6-31+G** - PCM Dichloroethane .....                                     | 7  |
| <i>t</i> -butanol 6-31G* Gas Phase .....                                                                | 7  |
| <i>t</i> -butanol 6-31+G** Gas Phase.....                                                               | 8  |
| <i>t</i> -butanol 6-31G* - PCM Dichloroethane.....                                                      | 8  |
| <i>t</i> -butanol 6-31+G** - PCM Dichloroethane .....                                                   | 9  |
| Cyclohexenone oxide (8) – chair conformation –6-31G* Gas Phase .....                                    | 9  |
| Cyclohexenone oxide (8) – chair conformation –6-31+G** Gas Phase.....                                   | 10 |
| Cyclohexenone oxide (8) – chair conformation –6-31G* - PCM Dichloroethane.....                          | 10 |
| Cyclohexenone oxide (8) – chair conformation –6-31+G** - PCM Dichloroethane .....                       | 11 |
| Cyclohexenone oxide (8) – boat conformation –6-31G* Gas Phase .....                                     | 12 |
| Cyclohexenone oxide (8) – boat conformation –6-31+G** Gas Phase .....                                   | 12 |
| Cyclohexenone oxide (8) – boat conformation –6-31G* - PCM Dichloroethane.....                           | 13 |
| Cyclohexenone oxide (8) – boat conformation –6-31+G** - PCM Dichloroethane .....                        | 13 |
| DBU Model (9) – 6-31G* Gas Phase.....                                                                   | 14 |
| DBU Model (9) – 6-31+G** Gas Phase .....                                                                | 14 |
| DBU Model (9) – 6-31G* - PCM Dichloroethane .....                                                       | 15 |
| DBU Model (9) – 6-31+G** - PCM Dichloroethane.....                                                      | 15 |
| Dbu model complex with HOOtBu 6-31G* Gas Phase .....                                                    | 16 |
| Dbu model complex with HOOtBu 6-31+G** Gas Phase.....                                                   | 17 |
| Dbu model complex with HOOtBu 6-31G* - PCM Dichloroethane .....                                         | 18 |
| Dbu model complex with HOOtBu 6-31+G** - PCM Dichloroethane .....                                       | 19 |
| Ts 1 from axial attack with DBU model, orientation A (10) – 6-31G* - Gas Phase .....                    | 20 |
| Ts 1 from axial attack with DBU model, orientation A (10) – 6-31+G** - Gas Phase .....                  | 21 |
| Ts 1 from axial attack with DBU model, orientation A (10) – 6-31G* - PCM Dichloroethane .....           | 22 |
| Ts 1 from axial attack with DBU model, orientation A (10) – 6-31+G** - PCM Dichloroethane.....          | 23 |
| Intermediate from axial attack with DBU model, orientation A (11) – 6-31G* Gas Phase .....              | 24 |
| Intermediate from axial attack with DBU model, orientation A (11) – 6-31+G** Gas Phase.....             | 25 |
| Intermediate from axial attack with DBU model, orientation A (11) – 6-31G* - PCM Dichloroethane.....    | 26 |
| Intermediate from axial attack with DBU model, orientation A (11) – 6-31+G** - PCM Dichloroethane ..... | 27 |
| Ts 2 from axial attack with DBU model, orientation A (12) – 6-31G* - Gas Phase .....                    | 28 |
| Ts 2 from axial attack with DBU model, orientation A (12) – 6-31+G** - Gas Phase .....                  | 29 |
| Ts 2 from axial attack with DBU model, orientation A (12) – 6-31G* - PCM Dichloroethane .....           | 30 |
| Ts 2 from axial attack with DBU model, orientation A (12) – 6-31+G** - PCM Dichloroethane.....          | 32 |
| Ts 1 from axial attack with DBU model, orientation B – 6-31G* - Gas Phase.....                          | 33 |
| Ts 1 from axial attack with DBU model, orientation B – 6-31+G** - Gas Phase .....                       | 34 |
| Ts 1 from axial attack with DBU model, orientation B – 6-31G* - PCM Dichloroethane .....                | 35 |
| Ts 1 from axial attack with DBU model, orientation B – 6-31+G** - PCM Dichloroethane .....              | 36 |
| Intermediate from axial attack with DBU model, orientation B – 6-31G* Gas Phase .....                   | 37 |
| Intermediate from axial attack with DBU model, orientation B – 6-31+G** Gas Phase.....                  | 38 |

|                                                                                                                  |    |
|------------------------------------------------------------------------------------------------------------------|----|
| Intermediate from axial attack with DBU model, orientation B – 6-31G* – PCM Dichloroethane .....                 | 39 |
| Intermediate from axial attack with DBU model, orientation B – 6-31+G** - PCM Dichloroethane .....               | 40 |
| Ts 2 from axial attack with DBU model, orientation B – 6-31G* - PCM Dichloroethane .....                         | 41 |
| Ts 2 from axial attack with DBU model, orientation B – 6-31+G** - PCM Dichloroethane .....                       | 42 |
| Ts 1 from equatorial attack with DBU model, orientation A – 6-31G* - Gas Phase.....                              | 44 |
| Ts 1 from equatorial attack with DBU model, orientation A – 6-31+G** - Gas Phase .....                           | 45 |
| Ts 1 from equatorial attack with DBU model, orientation A – 6-31G* - PCM Dichloroethane.....                     | 46 |
| Ts 1 from equatorial attack with DBU model, orientation A – 6-31+G** - PCM Dichloroethane .....                  | 47 |
| Intermediate from equatorial attack with DBU model, orientation A – 6-31G* Gas Phase.....                        | 48 |
| Intermediate from equatorial attack with DBU model, orientation A – 6-31+G** Gas Phase .....                     | 49 |
| Intermediate from equatorial attack with DBU model, orientation A – 6-31G* – PCM Dichloroethane .....            | 50 |
| Intermediate from equatorial attack with DBU model, orientation A – 6-31+G** - PCM Dichloroethane .....          | 51 |
| Ts 2 from equatorial attack with DBU model, orientation A – 6-31G* - Gas Phase.....                              | 52 |
| Ts 2 from equatorial attack with DBU model, orientation A – 6-31+G** - Gas Phase .....                           | 54 |
| Ts 2 from equatorial attack with DBU model, orientation A – 6-31G* - PCM Dichloroethane.....                     | 55 |
| Ts 2 from equatorial attack with DBU model, orientation A – 6-31+G** - PCM Dichloroethane .....                  | 56 |
| Ts 1 from equatorial attack with DBU model, orientation B (13) – 6-31G* - Gas Phase .....                        | 57 |
| Ts 1 from equatorial attack with DBU model, orientation B (13) – 6-31+G** - Gas Phase.....                       | 58 |
| Ts 1 from equatorial attack with DBU model, orientation B (13) – 6-31G* - PCM Dichloroethane.....                | 59 |
| Ts 1 from equatorial attack with DBU model, orientation B (13) – 6-31+G** - PCM Dichloroethane .....             | 60 |
| Intermediate from equatorial attack with DBU model, orientation B (14) – 6-31G* Gas Phase.....                   | 61 |
| Intermediate from equatorial attack with DBU model, orientation B (14) – 6-31+G** Gas Phase .....                | 62 |
| Intermediate from equatorial attack with DBU model, orientation B (14) – 6-31G* – PCM Dichloroethane .....       | 63 |
| Intermediate from equatorial attack with DBU model, orientation B (14) – 6-31+G** - PCM Dichloroethane.....      | 65 |
| Ts 2 from equatorial attack with DBU model, orientation B – (15) 6-31G* - Gas Phase .....                        | 66 |
| Ts 2 from equatorial attack with DBU model, orientation B (15) – 6-31+G** - Gas Phase.....                       | 67 |
| Ts 2 from equatorial attack with DBU model, orientation B (15) – 6-31G* - PCM Dichloroethane.....                | 68 |
| Ts 2 from equatorial attack with DBU model, orientation B (15) – 6-31+G** - PCM Dichloroethane .....             | 69 |
| Ts 1 from gauche axial attack with DBU model – 6-31G* - Gas Phase.....                                           | 70 |
| Ts 1 from gauche axial attack with DBU model – 6-31+G** - Gas Phase .....                                        | 71 |
| Ts 1 from gauche axial attack with DBU model B – 6-31G* - PCM Dichloroethane.....                                | 72 |
| Ts 1 from gauche axial attack with DBU model B – 6-31+G** - PCM Dichloroethane .....                             | 73 |
| Intermediate from gauche axial attack with DBU model – 6-31G* - Gas Phase .....                                  | 74 |
| Intermediate from gauche axial attack with DBU model – 6-31+G** - Gas Phase.....                                 | 75 |
| Intermediate from gauche axial attack with DBU model B – 6-31G* - PCM Dichloroethane.....                        | 77 |
| Intermediate from gauche axial attack with DBU model B – 6-31+G** - PCM Dichloroethane .....                     | 78 |
| 3-tert-Butylhydroperoxycyclohexanone - 6-31G* Gas Phase .....                                                    | 79 |
| 3-tert-Butylhydroperoxycyclohexanone - 6-31+G** Gas Phase.....                                                   | 80 |
| 3-tert-Butylhydroperoxycyclohexanone - 6-31G* – PCM Dichloroethane.....                                          | 80 |
| 3-tert-Butylhydroperoxycyclohexanone - 6-31+G** – PCM Dichloroethane .....                                       | 81 |
| 4-methylcyclohexanone - 6-31G* (23) – Gas Phase .....                                                            | 82 |
| 4-methylcyclohexanone - 6-31+G** (23) – Gas Phase .....                                                          | 82 |
| 4-methylcyclohexanone - 6-31G* (23) – PCM Dichloroethane.....                                                    | 83 |
| 4-methylcyclohexanone - 6-31+G** (23) – PCM Dichloroethane .....                                                 | 84 |
| Ts 1 from axial attack on methylcyclohexanone, methyl equatorial (16) – 6-31G* – PCM Dichloroethane .....        | 84 |
| Ts 1 from axial attack on methylcyclohexanone, methyl equatorial (16) – 6-31+G** – PCM Dichloroethane.....       | 85 |
| Ts 1 from axial attack on methylcyclohexanone, methyl axial (17) – 6-31G* – PCM Dichloroethane.....              | 86 |
| Ts 1 from axial attack on methylcyclohexanone, methyl axial (17) – 6-31+G** – PCM Dichloroethane .....           | 88 |
| Ts 1 from equatorial attack on methylcyclohexanone, methyl equatorial (18) – 6-31+G** – PCM Dichloroethane ..... | 89 |
| Table of Absolute and Relative Energies .....                                                                    | 90 |
| Isotope Effect Results and Calculations .....                                                                    | 93 |

## Theoretical Structures

All structures and energies were obtained using standard procedures in Gaussian 03.<sup>1</sup> All structures described as transition structures or TS have been verified to have one imaginary frequency. All other structures have been verified to have zero imaginary frequencies.

1. Gaussian 03, Revision B.04, M. J. Frisch, G. W. Trucks, H. B. Schlegel, G. E. Scuseria, M. A. Robb, J. R. Cheeseman, J. A. Montgomery, Jr., T. Vreven, K. N. Kudin, J. C. Burant, J. M. Millam, S. S. Iyengar, J. Tomasi, V. Barone, B. Mennucci, M. Cossi, G. Scalmani, N. Rega, G. A. Petersson, H. Nakatsuji, M. Hada, M. Ehara, K. Toyota, R. Fukuda, J. Hasegawa, M. Ishida, T. Nakajima, Y. Honda, O. Kitao, H. Nakai, M. Klene, X. Li, J. E. Knox, H. P. Hratchian, J. B. Cross, C. Adamo, J. Jaramillo, R. Gomperts, R. E. Stratmann, O. Yazyev, A. J. Austin, R. Cammi, C. Pomelli, J. W. Ochterski, P. Y. Ayala, K. Morokuma, G. A. Voth, P. Salvador, J. J. Dannenberg, V. G. Zakrzewski, S. Dapprich, A. D. Daniels, M. C. Strain, O. Farkas, D. K. Malick, A. D. Rabuck, K. Raghavachari, J. B. Foresman, J. V. Ortiz, Q. Cui, A. G. Baboul, S. Clifford, J. Cioslowski, B. B. Stefanov, G. Liu, A. Liashenko, P. Piskorz, I. Komaromi, R. L. Martin, D. J. Fox, T. Keith, M. A. Al-Laham, C. Y. Peng, A. Nanayakkara, M. Challacombe, P. M. W. Gill, B. Johnson, W. Chen, M. W. Wong, C. Gonzalez, and J. A. Pople, Gaussian, Inc., Pittsburgh PA, 2003.

### Cyclohexenone – 6-31G\* Gas Phase

E(RB+HF-LYP) = -308.666132412

|                                              |                             |
|----------------------------------------------|-----------------------------|
| Zero-point correction=                       | 0.127949 (Hartree/Particle) |
| Thermal correction to Energy=                | 0.134033                    |
| Thermal correction to Enthalpy=              | 0.134977                    |
| Thermal correction to Gibbs Free Energy=     | 0.098046                    |
| Sum of electronic and zero-point Energies=   | -308.538183                 |
| Sum of electronic and thermal Energies=      | -308.532099                 |
| Sum of electronic and thermal Enthalpies=    | -308.531155                 |
| Sum of electronic and thermal Free Energies= | -308.568086                 |

|       | E (Thermal) | CV             | S              |
|-------|-------------|----------------|----------------|
|       | KCal/Mol    | Cal/Mol-Kelvin | Cal/Mol-Kelvin |
| Total | 84.107      | 23.132         | 77.729         |

C,0,0.8708466997,-0.5288422935,-0.5196205762  
 C,0,1.0124466372,-0.0760027397,0.8829988402  
 O,0,1.816330977,-0.98870742,-1.1426269112  
 C,0,-0.0100588159,0.4588958475,1.572071204  
 H,0,1.9914400115,-0.2230833423,1.3320121427  
 C,0,-1.3722539208,0.7030131125,0.9789290195  
 H,0,0.1349273641,0.7340270057,2.6164555651  
 C,0,-1.3285643516,0.7450560069,-0.5555545179  
 H,0,-2.0552720062,-0.0927047033,1.3195251711  
 H,0,-1.7877856292,1.6367312192,1.3792727763  
 C,0,-0.5290477215,-0.4368434435,-1.1210719416  
 H,0,-2.3446792725,0.7518687794,-0.9664363125  
 H,0,-0.8527392544,1.6834186525,-0.8697032776  
 H,0,-1.0445367031,-1.3814643354,-0.8865215298  
 H,0,-0.4322134881,-0.3907928565,-2.2101014145

**Cyclohexenone – 6-31+G\*\* Gas Phase**

E(RB+HF-LYP) = -308.691053132

|                                              |                             |
|----------------------------------------------|-----------------------------|
| Zero-point correction=                       | 0.127172 (Hartree/Particle) |
| Thermal correction to Energy=                | 0.133281                    |
| Thermal correction to Enthalpy=              | 0.134225                    |
| Thermal correction to Gibbs Free Energy=     | 0.097244                    |
| Sum of electronic and zero-point Energies=   | -308.563881                 |
| Sum of electronic and thermal Energies=      | -308.557772                 |
| Sum of electronic and thermal Enthalpies=    | -308.556828                 |
| Sum of electronic and thermal Free Energies= | -308.593809                 |

|       | E (Thermal)<br>KCal/Mol | CV<br>Cal/Mol-Kelvin | S<br>Cal/Mol-Kelvin |
|-------|-------------------------|----------------------|---------------------|
| Total | 83.635                  | 23.290               | 77.833              |

C,0,0.868235807,-0.5298809526,-0.5177522614  
 C,0,1.01483359,-0.0753609898,0.8830726986  
 O,0,1.8137084455,-0.9988304991,-1.1407760611  
 C,0,-0.0095459014,0.4625554365,1.5716809331  
 H,0,1.9928973867,-0.2223423634,1.3330516872  
 C,0,-1.3717552965,0.7054866448,0.978909958  
 H,0,0.1378496644,0.7373224575,2.6154178884  
 C,0,-1.3301366163,0.7461552904,-0.5557364086  
 H,0,-2.05173598,-0.0912061497,1.321743631  
 H,0,-1.7866481758,1.6382948705,1.3800539316  
 C,0,-0.5268744671,-0.4328232947,-1.1235690551  
 H,0,-2.3462261653,0.7470191621,-0.96536197  
 H,0,-0.8598021729,1.686193953,-0.8722191044  
 H,0,-1.0390770816,-1.3800541646,-0.8947352825  
 H,0,-0.4254677332,-0.3813765806,-2.2113774799

**Cyclohexenone – 6-31G\* - PCM Dichloroethane**

E(RB+HF-LYP) = -308.674398820

|                                              |                             |
|----------------------------------------------|-----------------------------|
| Zero-point correction=                       | 0.127369 (Hartree/Particle) |
| Thermal correction to Energy=                | 0.133454                    |
| Thermal correction to Enthalpy=              | 0.134399                    |
| Thermal correction to Gibbs Free Energy=     | 0.097478                    |
| Sum of electronic and zero-point Energies=   | -308.547029                 |
| Sum of electronic and thermal Energies=      | -308.540944                 |
| Sum of electronic and thermal Enthalpies=    | -308.540000                 |
| Sum of electronic and thermal Free Energies= | -308.576921                 |

|       | E (Thermal)<br>KCal/Mol | CV<br>Cal/Mol-Kelvin | S<br>Cal/Mol-Kelvin |
|-------|-------------------------|----------------------|---------------------|
| Total | 83.744                  | 23.176               | 77.705              |

C,0,0.8674262741,-0.5267427725,-0.515352085  
 C,0,1.0143423955,-0.0751723776,0.8804868189  
 O,0,1.8149965079,-0.9981502295,-1.1412236964  
 C,0,-0.0109343567,0.459750182,1.5701165811  
 H,0,1.993227667,-0.2229341358,1.3349265448  
 C,0,-1.3710374722,0.7051518717,0.977749841  
 H,0,0.1347903473,0.7319182605,2.6170607355  
 C,0,-1.3297586335,0.7468403326,-0.5562512253  
 H,0,-2.0512028124,-0.0922199984,1.32172629  
 H,0,-1.7847533459,1.6383363885,1.3813420737  
 C,0,-0.5262692609,-0.4327774122,-1.1211987244  
 H,0,-2.3460671583,0.7445631686,-0.9663312309  
 H,0,-0.8589324774,1.687081044,-0.8733930961  
 H,0,-1.0406595377,-1.3792295771,-0.8878682748

H,0,-0.4289884241,-0.3846122576,-2.2109807083

### Cyclohexenone – 6-31+G\*\* - PCM Dichloroethane

E(RB+HF-LYP) = -308.701464004

|                                              |                             |
|----------------------------------------------|-----------------------------|
| Zero-point correction=                       | 0.126464 (Hartree/Particle) |
| Thermal correction to Energy=                | 0.132570                    |
| Thermal correction to Enthalpy=              | 0.133514                    |
| Thermal correction to Gibbs Free Energy=     | 0.096559                    |
| Sum of electronic and zero-point Energies=   | -308.575000                 |
| Sum of electronic and thermal Energies=      | -308.568894                 |
| Sum of electronic and thermal Enthalpies=    | -308.567950                 |
| Sum of electronic and thermal Free Energies= | -308.604905                 |

|       | E (Thermal)<br>KCal/Mol | CV<br>Cal/Mol-Kelvin | S<br>Cal/Mol-Kelvin |
|-------|-------------------------|----------------------|---------------------|
| Total | 83.189                  | 23.331               | 77.780              |

C,0,0.8636677704,-0.5273862026,-0.5121933653  
 C,0,1.0172569278,-0.0738445916,0.8795792693  
 O,0,1.8120635641,-1.0117463208,-1.1386250137  
 C,0,-0.0106786424,0.4640271769,1.56887479  
 H,0,1.9951351289,-0.221482417,1.3366230651  
 C,0,-1.3700602963,0.7082240283,0.9774071295  
 H,0,0.1373911019,0.73490935,2.6160745163  
 C,0,-1.3315747902,0.7483494988,-0.5565166171  
 H,0,-2.0464762114,-0.0905589538,1.3248701252  
 H,0,-1.7831469249,1.6402934119,1.3826349413  
 C,0,-0.5232632516,-0.4274279256,-1.1238389479  
 H,0,-2.3479315193,0.7378892127,-0.96507092  
 H,0,-0.8677405295,1.6908920775,-0.8765341978  
 H,0,-1.0344005611,-1.3770070801,-0.8970031808  
 H,0,-0.4214253033,-0.3726169393,-2.2124677904

### t-Butyl Hydroperoxide – 6-31G\* Gas Phase

E(RB+HF-LYP) = -308.802154705

|                                              |                             |
|----------------------------------------------|-----------------------------|
| Zero-point correction=                       | 0.139541 (Hartree/Particle) |
| Thermal correction to Energy=                | 0.147519                    |
| Thermal correction to Enthalpy=              | 0.148464                    |
| Thermal correction to Gibbs Free Energy=     | 0.108623                    |
| Sum of electronic and zero-point Energies=   | -308.662614                 |
| Sum of electronic and thermal Energies=      | -308.654635                 |
| Sum of electronic and thermal Enthalpies=    | -308.653691                 |
| Sum of electronic and thermal Free Energies= | -308.693531                 |

|       | E (Thermal)<br>KCal/Mol | CV<br>Cal/Mol-Kelvin | S<br>Cal/Mol-Kelvin |
|-------|-------------------------|----------------------|---------------------|
| Total | 92.570                  | 28.888               | 83.851              |

C,0,1.0054098095,-1.4491964527,0.4998789743  
 C,0,0.3564293,-0.1553038646,-0.0060246468  
 O,0,-1.0043670839,-0.306092839,0.4710581157  
 O,0,-1.7769892579,0.8720116109,0.0971905635  
 C,0,1.0030698891,1.0786874629,0.6315238378  
 C,0,0.3782940102,-0.0831582328,-1.537132013  
 H,0,2.065398675,-1.4671591457,0.225613265  
 H,0,0.9273801776,-1.5172220599,1.5894446744  
 H,0,0.5186745049,-2.3265737817,0.0616000974  
 H,0,2.0515090917,1.165730337,0.3244184116  
 H,0,0.4770576385,1.9879512293,0.3287606124

H,0,0.9653967387,1.0054671145,1.7233615003  
 H,0,1.4083808716,-0.0401380237,-1.9074661385  
 H,0,-0.1035445462,-0.9673701836,-1.9702311188  
 H,0,-0.1453899668,0.8106576841,-1.8887327165  
 H,0,-2.3732305036,0.4751331774,-0.5622349344

### t-Butyl Hydroperoxide – 6-31+G\*\* Gas Phase

E(RB+HF-LYP) = -308.834681482

|                                              |                             |
|----------------------------------------------|-----------------------------|
| Zero-point correction=                       | 0.138618 (Hartree/Particle) |
| Thermal correction to Energy=                | 0.146665                    |
| Thermal correction to Enthalpy=              | 0.147609                    |
| Thermal correction to Gibbs Free Energy=     | 0.107618                    |
| Sum of electronic and zero-point Energies=   | -308.696063                 |
| Sum of electronic and thermal Energies=      | -308.688017                 |
| Sum of electronic and thermal Enthalpies=    | -308.687073                 |
| Sum of electronic and thermal Free Energies= | -308.727064                 |

|       | E (Thermal)<br>KCal/Mol | CV<br>Cal/Mol-Kelvin | S<br>Cal/Mol-Kelvin |
|-------|-------------------------|----------------------|---------------------|
| Total | 92.033                  | 29.133               | 84.168              |

C,0,1.0031369474,-1.4501107255,0.5039101531  
 C,0,0.3598783529,-0.156265562,-0.0095138901  
 O,0,-1.0083646011,-0.3080614144,0.4595834763  
 O,0,-1.7780821509,0.8789136888,0.0933298143  
 C,0,0.9976739193,1.078846752,0.6349925469  
 C,0,0.3957718112,-0.0857648768,-1.540090363  
 H,0,2.0634764978,-1.4655183576,0.2331386343  
 H,0,0.9217825726,-1.5160980141,1.5926973372  
 H,0,0.5202878915,-2.327911859,0.0638667853  
 H,0,2.0501777641,1.1580905818,0.3424851343  
 H,0,0.4824068559,1.9894518293,0.3197383113  
 H,0,0.9437815146,1.0099859092,1.7257626  
 H,0,1.4315530144,-0.0582550816,-1.8944785008  
 H,0,-0.0921428589,-0.9637501777,-1.9768224775  
 H,0,-0.1087192716,0.8146792873,-1.9006928959  
 H,0,-2.4597961487,0.4722741618,-0.464791935

### t-Butyl Hydroperoxide – 6-31G\* - PCM Dichloroethane

E(RB+HF-LYP) = -308.811124661

|                                              |                             |
|----------------------------------------------|-----------------------------|
| Zero-point correction=                       | 0.138898 (Hartree/Particle) |
| Thermal correction to Energy=                | 0.146779                    |
| Thermal correction to Enthalpy=              | 0.147723                    |
| Thermal correction to Gibbs Free Energy=     | 0.108084                    |
| Sum of electronic and zero-point Energies=   | -308.672226                 |
| Sum of electronic and thermal Energies=      | -308.664346                 |
| Sum of electronic and thermal Enthalpies=    | -308.663402                 |
| Sum of electronic and thermal Free Energies= | -308.703041                 |

|       | E (Thermal)<br>KCal/Mol | CV<br>Cal/Mol-Kelvin | S<br>Cal/Mol-Kelvin |
|-------|-------------------------|----------------------|---------------------|
| Total | 92.105                  | 28.762               | 83.428              |

C,0,1.0063701324,-1.4494773337,0.5001966755  
 C,0,0.3574599045,-0.1561776424,-0.0071999026  
 O,0,-1.0077924349,-0.3052290424,0.4675710025  
 O,0,-1.7816926358,0.8741080714,0.0982604124  
 C,0,1.0044948474,1.076586917,0.6322109616  
 C,0,0.3854357501,-0.0830082086,-1.5369375116

H,0,2.0641474703,-1.4694561366,0.2178332421  
 H,0,0.93846629,-1.5143745267,1.5911584277  
 H,0,0.5162888766,-2.3277059548,0.0667069666  
 H,0,2.0559482339,1.1544538094,0.3337194566  
 H,0,0.4891102159,1.9888452528,0.3192326426  
 H,0,0.9589757309,1.0085257092,1.7246176851  
 H,0,1.417777223,-0.0331685906,-1.9001262247  
 H,0,-0.0895298825,-0.9695063853,-1.9726353937  
 H,0,-0.1443310755,0.8065374775,-1.890178207  
 H,0,-2.4135363233,0.4772747192,-0.5466012519

### t-Butyl Hydroperoxide – 6-31+G\*\* - PCM Dichloroethane

E(RB+HF-LYP) = -308.844828851

|                                              |                             |
|----------------------------------------------|-----------------------------|
| Zero-point correction=                       | 0.137794 (Hartree/Particle) |
| Thermal correction to Energy=                | 0.145733                    |
| Thermal correction to Enthalpy=              | 0.146677                    |
| Thermal correction to Gibbs Free Energy=     | 0.106937                    |
| Sum of electronic and zero-point Energies=   | -308.707034                 |
| Sum of electronic and thermal Energies=      | -308.699096                 |
| Sum of electronic and thermal Enthalpies=    | -308.698152                 |
| Sum of electronic and thermal Free Energies= | -308.737892                 |

|       | E (Thermal)<br>KCal/Mol | CV<br>Cal/Mol-Kelvin | S<br>Cal/Mol-Kelvin |
|-------|-------------------------|----------------------|---------------------|
| Total | 91.449                  | 29.031               | 83.641              |

C,0,1.0073197616,-1.4489379826,0.5009683424  
 C,0,0.3620815294,-0.1554638795,-0.0101134438  
 O,0,-1.0099576687,-0.3056331633,0.4645520825  
 O,0,-1.7904760284,0.8738727355,0.100751611  
 C,0,1.0044689718,1.0781572878,0.6315758026  
 C,0,0.3942104805,-0.0848285034,-1.5395410371  
 H,0,2.0689666534,-1.4567340671,0.2349754926  
 H,0,0.9240434313,-1.5206268371,1.5898272596  
 H,0,0.5328307694,-2.3275725531,0.052834591  
 H,0,2.0562122293,1.1511344856,0.3351293493  
 H,0,0.4943015896,1.9912315475,0.3140528458  
 H,0,0.9564581326,1.0118690031,1.7233244263  
 H,0,1.4302547718,-0.0587622801,-1.8930357872  
 H,0,-0.095563335,-0.9621234619,-1.9756197495  
 H,0,-0.1103980869,0.8156031361,-1.9004976346  
 H,0,-2.4621210383,0.4765029153,-0.5007583258

### t-butanol 6-31G\* Gas Phase

E(RB+HF-LYP) = -233.670971211

|                                              |                             |
|----------------------------------------------|-----------------------------|
| Zero-point correction=                       | 0.136280 (Hartree/Particle) |
| Thermal correction to Energy=                | 0.142965                    |
| Thermal correction to Enthalpy=              | 0.143909                    |
| Thermal correction to Gibbs Free Energy=     | 0.107336                    |
| Sum of electronic and zero-point Energies=   | -233.534691                 |
| Sum of electronic and thermal Energies=      | -233.528006                 |
| Sum of electronic and thermal Enthalpies=    | -233.527062                 |
| Sum of electronic and thermal Free Energies= | -233.563636                 |

|       | E (Thermal)<br>KCal/Mol | CV<br>Cal/Mol-Kelvin | S<br>Cal/Mol-Kelvin |
|-------|-------------------------|----------------------|---------------------|
| Total | 89.712                  | 24.726               | 76.975              |

C,0,-0.0072890735,-0.0126250502,0.0026330234

C,0,-0.0344720364,-0.0597077787,1.5320596908  
 C,0,1.4363503487,-0.0437731575,-0.5217646529  
 O,0,-0.6961039782,-1.2056876921,-0.4132563957  
 C,0,-0.7560842819,1.2220291951,-0.5217642872  
 H,0,-0.6998903675,-1.2122456323,-1.3840623287  
 H,0,-0.766181848,1.2340697076,-1.6198905338  
 H,0,-1.7937393545,1.2120752889,-0.1722356373  
 H,0,-0.2842184664,2.1526741649,-0.1853777061  
 H,0,1.4518262474,-0.0464974874,-1.6198909037  
 H,0,2.0063794888,0.8301972071,-0.1853780882  
 H,0,1.9465578665,-0.9473856847,-0.1722362612  
 H,0,-1.0684655881,-0.077551149,1.8917892493  
 H,0,0.4670722473,-0.9640940714,1.8917889932  
 H,0,0.4696265512,0.8134167197,1.9602668708

### **t-butanol 6-31+G\*\* Gas Phase**

E(RB+HF-LYP) = -233.701735701

|                                              |                             |
|----------------------------------------------|-----------------------------|
| Zero-point correction=                       | 0.135395 (Hartree/Particle) |
| Thermal correction to Energy=                | 0.142132                    |
| Thermal correction to Enthalpy=              | 0.143076                    |
| Thermal correction to Gibbs Free Energy=     | 0.106405                    |
| Sum of electronic and zero-point Energies=   | -233.566340                 |
| Sum of electronic and thermal Energies=      | -233.559604                 |
| Sum of electronic and thermal Enthalpies=    | -233.558660                 |
| Sum of electronic and thermal Free Energies= | -233.595331                 |

|       | E (Thermal) | CV             | S              |
|-------|-------------|----------------|----------------|
|       | KCal/Mol    | Cal/Mol-Kelvin | Cal/Mol-Kelvin |
| Total | 89.189      | 24.956         | 77.180         |

C,0,-0.0061612474,-0.0106715974,0.002531389  
 C,0,-0.0347622342,-0.0602104161,1.5317081305  
 C,0,1.4373481277,-0.0417679284,-0.5222267876  
 O,0,-0.6971158344,-1.207440278,-0.416855266  
 C,0,-0.7548465926,1.223895912,-0.522226422  
 H,0,-0.7123284076,-1.2337889563,-1.3834382483  
 H,0,-0.7636169962,1.2384086432,-1.6194039649  
 H,0,-1.7917096252,1.2161215542,-0.1721469571  
 H,0,-0.2792506769,2.1505867552,-0.1820784003  
 H,0,1.454301449,-0.0421067923,-1.6194043348  
 H,0,2.0020878442,0.8334557326,-0.1820787808  
 H,0,1.9490471695,-0.9436047543,-0.1721475811  
 H,0,-1.0682353246,-0.0772907108,1.8911466897  
 H,0,0.4671826615,-0.9637644381,1.8911464336  
 H,0,0.4694274415,0.8130718521,1.9581551296

### **t-butanol 6-31G\* - PCM Dichloroethane**

E(RB+HF-LYP) = -233.677778544

|                                              |                             |
|----------------------------------------------|-----------------------------|
| Zero-point correction=                       | 0.135675 (Hartree/Particle) |
| Thermal correction to Energy=                | 0.142328                    |
| Thermal correction to Enthalpy=              | 0.143272                    |
| Thermal correction to Gibbs Free Energy=     | 0.106764                    |
| Sum of electronic and zero-point Energies=   | -233.542104                 |
| Sum of electronic and thermal Energies=      | -233.535451                 |
| Sum of electronic and thermal Enthalpies=    | -233.534506                 |
| Sum of electronic and thermal Free Energies= | -233.571015                 |

| E (Thermal) | CV | S |
|-------------|----|---|
|-------------|----|---|

|                                               | KCal/Mol | Cal/Mol-Kelvin | Cal/Mol-Kelvin |
|-----------------------------------------------|----------|----------------|----------------|
| Total                                         | 89.312   | 24.694         | 76.838         |
| C,0,-0.0075548914,-0.0130854601,0.0015282374  |          |                |                |
| C,0,-0.0340388579,-0.0589574909,1.5313570009  |          |                |                |
| C,0,1.4365307052,-0.0418314307,-0.5209689151  |          |                |                |
| O,0,-0.6970087405,-1.2072547853,-0.4188190157 |          |                |                |
| C,0,-0.7544928755,1.2231562522,-0.5209685497  |          |                |                |
| H,0,-0.7062079124,-1.22318794,-1.3989476587   |          |                |                |
| H,0,-0.7665009197,1.233051654,-1.618631744    |          |                |                |
| H,0,-1.7917539048,1.2175282695,-0.1685049756  |          |                |                |
| H,0,-0.2783851894,2.1513535239,-0.1837090162  |          |                |                |
| H,0,1.4511041235,-0.0472828388,-1.6186321139  |          |                |                |
| H,0,2.0023191408,0.8345886514,-0.1837093966   |          |                |                |
| H,0,1.9502875612,-0.942939744,-0.1685055997   |          |                |                |
| H,0,-1.0676991815,-0.0740365707,1.894091225   |          |                |                |
| H,0,0.469732758,-0.9616730543,1.8940909685    |          |                |                |
| H,0,0.4705089662,0.8149451086,1.9573237955    |          |                |                |

### **t-butanol 6-31+G\*\* - PCM Dichloroethane**

E(RB+HF-LYP) = -233.709837511

|                                              |                             |
|----------------------------------------------|-----------------------------|
| Zero-point correction=                       | 0.134555 (Hartree/Particle) |
| Thermal correction to Energy=                | 0.141293                    |
| Thermal correction to Enthalpy=              | 0.142237                    |
| Thermal correction to Gibbs Free Energy=     | 0.105558                    |
| Sum of electronic and zero-point Energies=   | -233.575282                 |
| Sum of electronic and thermal Energies=      | -233.568545                 |
| Sum of electronic and thermal Enthalpies=    | -233.567601                 |
| Sum of electronic and thermal Free Energies= | -233.604279                 |

|       | E (Thermal) | CV             | S              |
|-------|-------------|----------------|----------------|
|       | KCal/Mol    | Cal/Mol-Kelvin | Cal/Mol-Kelvin |
| Total | 88.662      | 24.983         | 77.197         |
| 1     | 6           | 0              | 0.006792       |
| 2     | 6           | 0              | 1.500934       |
| 3     | 6           | 0              | -0.674273      |
| 4     | 8           | 0              | -0.061865      |
| 5     | 6           | 0              | -0.674268      |
| 6     | 1           | 0              | -0.998366      |
| 7     | 1           | 0              | -1.735902      |
| 8     | 1           | 0              | -0.197535      |
| 9     | 1           | 0              | -0.610939      |
| 10    | 1           | 0              | -1.735908      |
| 11    | 1           | 0              | -0.610945      |
| 12    | 1           | 0              | -0.197543      |
| 13    | 1           | 0              | 1.984438       |
| 14    | 1           | 0              | 1.984435       |
| 15    | 1           | 0              | 1.658079       |

### **Cyclohexenone oxide (8) – chair conformation –6-31G\* Gas Phase**

E(RB+HF-LYP) = -383.859478756

|                                            |                             |
|--------------------------------------------|-----------------------------|
| Zero-point correction=                     | 0.133075 (Hartree/Particle) |
| Thermal correction to Energy=              | 0.139741                    |
| Thermal correction to Enthalpy=            | 0.140685                    |
| Thermal correction to Gibbs Free Energy=   | 0.102147                    |
| Sum of electronic and zero-point Energies= | -383.726404                 |
| Sum of electronic and thermal Energies=    | -383.719738                 |
| Sum of electronic and thermal Enthalpies=  | -383.718794                 |

Sum of electronic and thermal Free Energies= -383.757332

|       | E (Thermal)<br>KCal/Mol | CV<br>Cal/Mol-Kelvin | S<br>Cal/Mol-Kelvin |
|-------|-------------------------|----------------------|---------------------|
| Total | 87.689                  | 25.550               | 81.110              |

C,0,-0.6045766941,-0.518910548,-1.2398618435  
 C,0,0.8412500082,-0.433703324,-0.7858382871  
 C,0,1.0268284283,-0.1330359383,0.6762269034  
 C,0,-0.0677546986,0.5616651699,1.4068962299  
 C,0,-1.3642378863,0.9621791914,0.7191646707  
 C,0,-1.346241832,0.7658253488,-0.8092617904  
 O,0,1.7994951422,-0.5352088227,-1.5289431598  
 H,0,2.0605905327,-0.0455938837,1.0085879313  
 H,0,0.2208494845,1.1439447293,2.2839893776  
 H,0,-2.1657861511,0.3631681093,1.1708608084  
 H,0,-1.5858668258,2.0101162159,0.9540437145  
 H,0,-2.3719415197,0.7492850431,-1.1947629817  
 H,0,-0.851681,1.6258053634,-1.2797840941  
 H,0,-1.0759746325,-1.3954690189,-0.7770648261  
 H,0,-0.618307848,-0.6460895806,-2.3256578132  
 O,0,0.1409908253,-0.8418551366,1.563550549

### Cyclohexenone oxide (8) – chair conformation –6-31+G\*\* Gas Phase

E(RB+HF-LYP) = -383.886499281

|                                              |                             |
|----------------------------------------------|-----------------------------|
| Zero-point correction=                       | 0.132263 (Hartree/Particle) |
| Thermal correction to Energy=                | 0.138965                    |
| Thermal correction to Enthalpy=              | 0.139909                    |
| Thermal correction to Gibbs Free Energy=     | 0.101292                    |
| Sum of electronic and zero-point Energies=   | -383.754237                 |
| Sum of electronic and thermal Energies=      | -383.747534                 |
| Sum of electronic and thermal Enthalpies=    | -383.746590                 |
| Sum of electronic and thermal Free Energies= | -383.785208                 |

|       | E (Thermal)<br>KCal/Mol | CV<br>Cal/Mol-Kelvin | S<br>Cal/Mol-Kelvin |
|-------|-------------------------|----------------------|---------------------|
| Total | 87.202                  | 25.743               | 81.278              |

C,0,-0.6045772909,-0.5157307556,-1.2443877773  
 C,0,0.8365557346,-0.4394771646,-0.7819168619  
 C,0,1.0282426321,-0.131037038,0.6775867094  
 C,0,-0.0670398077,0.5660750875,1.4071897237  
 C,0,-1.3653751867,0.9597820869,0.720024052  
 C,0,-1.347882313,0.7671607311,-0.8089066613  
 O,0,1.7980670532,-0.5538154687,-1.5238932034  
 H,0,2.062294642,-0.0429663712,1.0058947496  
 H,0,0.2226468187,1.1513644402,2.2809416287  
 H,0,-2.1637761844,0.3572469196,1.1718032214  
 H,0,-1.5890703062,2.0061263502,0.9573769332  
 H,0,-2.3732420686,0.7480544786,-1.1936590267  
 H,0,-0.8561614163,1.6289190382,-1.2780482559  
 H,0,-1.0788580313,-1.3951519957,-0.7906221213  
 H,0,-0.6112402176,-0.6356175591,-2.3304637254  
 O,0,0.1470512754,-0.8388098611,1.5732260041

### Cyclohexenone oxide (8) – chair conformation –6-31G\* - PCM Dichloroethane

E(RB+HF-LYP) = -383.868521401

|                               |                             |
|-------------------------------|-----------------------------|
| Zero-point correction=        | 0.132560 (Hartree/Particle) |
| Thermal correction to Energy= | 0.139245                    |

|                                              |             |
|----------------------------------------------|-------------|
| Thermal correction to Enthalpy=              | 0.140189    |
| Thermal correction to Gibbs Free Energy=     | 0.101601    |
| Sum of electronic and zero-point Energies=   | -383.735961 |
| Sum of electronic and thermal Energies=      | -383.729277 |
| Sum of electronic and thermal Enthalpies=    | -383.728333 |
| Sum of electronic and thermal Free Energies= | -383.766920 |

|       | E (Thermal)<br>KCal/Mol | CV<br>Cal/Mol-Kelvin | S<br>Cal/Mol-Kelvin |
|-------|-------------------------|----------------------|---------------------|
| Total | 87.377                  | 25.628               | 81.215              |

C,0,-0.6044732118,-0.5174500049,-1.2411186827  
 C,0,0.8355989136,-0.4357692707,-0.7821713307  
 C,0,1.0271924725,-0.1299329593,0.675361243  
 C,0,-0.0686982434,0.5633506437,1.4063929749  
 C,0,-1.365489616,0.9594923953,0.7189531316  
 C,0,-1.3455987137,0.7685128033,-0.8093029647  
 O,0,1.7987294252,-0.5451289218,-1.5263886468  
 H,0,2.0622847771,-0.0375279634,1.008627441  
 H,0,0.2250851391,1.1470288727,2.2821459734  
 H,0,-2.1671466868,0.3581112876,1.1683381934  
 H,0,-1.5868173459,2.0065781624,0.9571884692  
 H,0,-2.370200454,0.7491677574,-1.1973611828  
 H,0,-0.8493597695,1.6292670263,-1.2768437645  
 H,0,-1.0792651321,-1.3940511261,-0.7800518596  
 H,0,-0.6188916935,-0.6444038825,-2.3275977013  
 O,0,0.1446854723,-0.8451219017,1.5659740956

### Cyclohexenone oxide (8) – chair conformation –6-31+G\*\* - PCM Dichloroethane

E(RB+HF-LYP) = -383.897712197

|                                              |                             |
|----------------------------------------------|-----------------------------|
| Zero-point correction=                       | 0.131609 (Hartree/Particle) |
| Thermal correction to Energy=                | 0.138331                    |
| Thermal correction to Enthalpy=              | 0.139275                    |
| Thermal correction to Gibbs Free Energy=     | 0.100605                    |
| Sum of electronic and zero-point Energies=   | -383.766104                 |
| Sum of electronic and thermal Energies=      | -383.759381                 |
| Sum of electronic and thermal Enthalpies=    | -383.758437                 |
| Sum of electronic and thermal Free Energies= | -383.797107                 |

|       | E (Thermal)<br>KCal/Mol | CV<br>Cal/Mol-Kelvin | S<br>Cal/Mol-Kelvin |
|-------|-------------------------|----------------------|---------------------|
| Total | 86.804                  | 25.838               | 81.389              |

C,0,-0.604254733,-0.5124540763,-1.2467129726  
 C,0,0.8295304894,-0.4442959389,-0.7772441398  
 C,0,1.0286973296,-0.1256481226,0.6762904737  
 C,0,-0.0679148766,0.5696173091,1.4060045465  
 C,0,-1.3676149191,0.955420296,0.7202435591  
 C,0,-1.3467879734,0.7712654489,-0.8085559888  
 O,0,1.7973496559,-0.5753562859,-1.5191061524  
 H,0,2.064813779,-0.030327565,1.0047722164  
 H,0,0.2280113788,1.1572174853,2.2780368932  
 H,0,-2.1645592609,0.3472934762,1.1684771992  
 H,0,-1.5939229634,1.9999548903,0.9630826614  
 H,0,-2.3707049963,0.7490682948,-1.196907272  
 H,0,-0.8530687459,1.6347936693,-1.2728579869  
 H,0,-1.0837525029,-1.3924786828,-0.7968668764  
 H,0,-0.6116903529,-0.6305885604,-2.3338468077  
 O,0,0.1535040249,-0.8413587195,1.5773360363

**Cyclohexenone oxide (8) – boat conformation –6-31G\* Gas Phase**

E(RB+HF-LYP) = -383.860029883

|                                              |                             |
|----------------------------------------------|-----------------------------|
| Zero-point correction=                       | 0.132884 (Hartree/Particle) |
| Thermal correction to Energy=                | 0.139573                    |
| Thermal correction to Enthalpy=              | 0.140517                    |
| Thermal correction to Gibbs Free Energy=     | 0.101774                    |
| Sum of electronic and zero-point Energies=   | -383.727146                 |
| Sum of electronic and thermal Energies=      | -383.720457                 |
| Sum of electronic and thermal Enthalpies=    | -383.719513                 |
| Sum of electronic and thermal Free Energies= | -383.758256                 |

|       | E (Thermal)<br>KCal/Mol | CV<br>Cal/Mol-Kelvin | S<br>Cal/Mol-Kelvin |
|-------|-------------------------|----------------------|---------------------|
| Total | 87.583                  | 25.620               | 81.542              |

C,0,-1.4833690685,0.3221382798,0.8038813089  
 C,0,-0.259695231,-0.3185222486,1.4758800677  
 C,0,0.8847031554,-0.6976104798,0.5400877398  
 C,0,0.870826677,-0.1292903567,-0.8554481054  
 C,0,-0.1009545952,0.9314129573,-1.2069001179  
 C,0,-1.0849851611,1.4390855181,-0.1726511181  
 O,0,1.8270728247,-1.3708715985,0.9131983311  
 O,0,-0.3034726436,-0.4118542793,-1.648476059  
 H,0,1.8159440156,-0.2232868526,-1.3889810088  
 H,0,0.1849049831,1.624287811,-2.0005274141  
 H,0,-0.6275763767,2.2835240714,0.3629424393  
 H,0,-1.974794331,1.8327555997,-0.6801089763  
 H,0,-2.1546742724,0.7231168379,1.571444832  
 H,0,-2.0432621271,-0.4412661228,0.2547920891  
 H,0,0.1831314813,0.3861995672,2.1969122352  
 H,0,-0.5316294812,-1.20680591,2.0566489771

**Cyclohexenone oxide (8) – boat conformation –6-31+G\*\* Gas Phase**

E(RB+HF-LYP) = -383.887129778

|                                              |                             |
|----------------------------------------------|-----------------------------|
| Zero-point correction=                       | 0.132097 (Hartree/Particle) |
| Thermal correction to Energy=                | 0.138810                    |
| Thermal correction to Enthalpy=              | 0.139755                    |
| Thermal correction to Gibbs Free Energy=     | 0.100985                    |
| Sum of electronic and zero-point Energies=   | -383.755033                 |
| Sum of electronic and thermal Energies=      | -383.748319                 |
| Sum of electronic and thermal Enthalpies=    | -383.747375                 |
| Sum of electronic and thermal Free Energies= | -383.786145                 |

|       | E (Thermal)<br>KCal/Mol | CV<br>Cal/Mol-Kelvin | S<br>Cal/Mol-Kelvin |
|-------|-------------------------|----------------------|---------------------|
| Total | 87.105                  | 25.801               | 81.598              |

C,0,-1.4850057972,0.3245772284,0.8080395052  
 C,0,-0.2607084998,-0.3209293628,1.4756925492  
 C,0,0.8809512263,-0.6969683127,0.5401227762  
 C,0,0.8743554793,-0.1276261469,-0.8551294536  
 C,0,-0.099173911,0.9334751363,-1.2055079177  
 C,0,-1.0883234348,1.4369765523,-0.1747267095  
 O,0,1.82479462,-1.3729685117,0.9138472162  
 O,0,-0.2974828007,-0.4115115281,-1.6531680234  
 H,0,1.8207835177,-0.2197310207,-1.3850689454  
 H,0,0.186450749,1.6265437304,-1.9979224614  
 H,0,-0.6343801135,2.2854492137,0.3567380397  
 H,0,-1.9775327352,1.824498903,-0.6866527901  
 H,0,-2.1474053781,0.7322969868,1.5789901807

H,0,-2.0541693586,-0.4380409892,0.2679382324  
 H,0,0.1874854159,0.3789936871,2.1972439291  
 H,0,-0.5322970294,-1.211200761,2.0523557733

### Cyclohexenone oxide (8) – boat conformation –6-31G\* - PCM Dichloroethane

E(RB+HF-LYP) = -383.869229545

|                                              |                             |
|----------------------------------------------|-----------------------------|
| Zero-point correction=                       | 0.132280 (Hartree/Particle) |
| Thermal correction to Energy=                | 0.138979                    |
| Thermal correction to Enthalpy=              | 0.139923                    |
| Thermal correction to Gibbs Free Energy=     | 0.101186                    |
| Sum of electronic and zero-point Energies=   | -383.736949                 |
| Sum of electronic and thermal Energies=      | -383.730251                 |
| Sum of electronic and thermal Enthalpies=    | -383.729307                 |
| Sum of electronic and thermal Free Energies= | -383.768044                 |

|       | E (Thermal) | CV             | S              |
|-------|-------------|----------------|----------------|
|       | KCal/Mol    | Cal/Mol-Kelvin | Cal/Mol-Kelvin |
| Total | 87.210      | 25.712         | 81.528         |

C,0,-1.4825465328,0.3250441549,0.8084706789  
 C,0,-0.2548496168,-0.3107406701,1.4774173746  
 C,0,0.8753427018,-0.7015837234,0.5381398672  
 C,0,0.87950102,-0.115222218,-0.8485216422  
 C,0,-0.0957982666,0.941223126,-1.2004727253  
 C,0,-1.0895376032,1.4388651886,-0.173101611  
 O,0,1.8038089371,-1.4086049041,0.9003609064  
 O,0,-0.2890441282,-0.4068620576,-1.6532581015  
 H,0,1.8306196713,-0.1981389172,-1.3773196846  
 H,0,0.1957092207,1.6374652158,-1.9906743251  
 H,0,-0.6385231082,2.2884003904,0.3598197758  
 H,0,-1.979739013,1.8240645829,-0.6865878347  
 H,0,-2.1470675951,0.7292947897,1.5799829266  
 H,0,-2.0474262539,-0.4431866698,0.2699468827  
 H,0,0.1988349463,0.4084673053,2.1790124651  
 H,0,-0.5231965543,-1.1881461518,2.0774057007

### Cyclohexenone oxide (8) – boat conformation –6-31+G\*\* - PCM Dichloroethane

E(RB+HF-LYP) = -383.898528125

|                                              |                             |
|----------------------------------------------|-----------------------------|
| Zero-point correction=                       | 0.131371 (Hartree/Particle) |
| Thermal correction to Energy=                | 0.138090                    |
| Thermal correction to Enthalpy=              | 0.139034                    |
| Thermal correction to Gibbs Free Energy=     | 0.100301                    |
| Sum of electronic and zero-point Energies=   | -383.767157                 |
| Sum of electronic and thermal Energies=      | -383.760438                 |
| Sum of electronic and thermal Enthalpies=    | -383.759494                 |
| Sum of electronic and thermal Free Energies= | -383.798227                 |

|       | E (Thermal) | CV             | S              |
|-------|-------------|----------------|----------------|
|       | KCal/Mol    | Cal/Mol-Kelvin | Cal/Mol-Kelvin |
| Total | 86.653      | 25.902         | 81.520         |

C,0,-1.4834852256,0.3286576597,0.8147870477  
 C,0,-0.2536652101,-0.3096713837,1.4784879536  
 C,0,0.8680898055,-0.7035512948,0.5374365537  
 C,0,0.8858138122,-0.1082658123,-0.8453285009  
 C,0,-0.0916325126,0.9474184311,-1.1959085928  
 C,0,-1.0949860449,1.4367125077,-0.175264601  
 O,0,1.7915634874,-1.4267494812,0.894962537  
 O,0,-0.2766260071,-0.4032191749,-1.6606642133

H,0,1.8407808334,-0.1854982168,-1.3677560521  
 H,0,0.2014248288,1.6458464226,-1.9831540045  
 H,0,-0.6514593186,2.2931969968,0.3523773344  
 H,0,-1.984965337,1.8113228103,-0.6958646341  
 H,0,-2.1369977292,0.7407559794,1.5908696805  
 H,0,-2.0586223091,-0.4403457164,0.2887500821  
 H,0,0.2100961478,0.4106171886,2.1723405112  
 H,0,-0.520564706,-1.1839468612,2.0827913308

### DBU Model (9) – 6-31G\* Gas Phase

E(RB+HF-LYP) = -345.358944743

|                                              |                             |
|----------------------------------------------|-----------------------------|
| Zero-point correction=                       | 0.180313 (Hartree/Particle) |
| Thermal correction to Energy=                | 0.188577                    |
| Thermal correction to Enthalpy=              | 0.189521                    |
| Thermal correction to Gibbs Free Energy=     | 0.147807                    |
| Sum of electronic and zero-point Energies=   | -345.178632                 |
| Sum of electronic and thermal Energies=      | -345.170368                 |
| Sum of electronic and thermal Enthalpies=    | -345.169424                 |
| Sum of electronic and thermal Free Energies= | -345.211137                 |

|       | E (Thermal)<br>KCal/Mol | CV<br>Cal/Mol-Kelvin | S<br>Cal/Mol-Kelvin |
|-------|-------------------------|----------------------|---------------------|
| Total | 118.334                 | 30.794               | 87.793              |

N,0,-0.4424517558,-0.6671718896,0.3131946191  
 C,0,0.7165659404,-0.6936312107,1.2020009473  
 C,0,1.9521020171,-0.1841579595,0.4654126107  
 C,0,1.639717136,1.1841554197,-0.1472664573  
 N,0,0.3877131467,1.222936492,-0.8943173882  
 C,0,-0.5309160846,0.364418871,-0.6234046311  
 C,0,-1.8085374495,0.4493320224,-1.4312506773  
 C,0,-1.6201368695,-1.3408826835,0.8322718498  
 H,0,2.4479287991,1.4899082248,-0.8237948322  
 H,0,1.6028165527,1.9503463563,0.6431813864  
 H,0,-1.3311718993,-2.3316499894,1.2021413065  
 H,0,-2.0914416062,-0.7956824726,1.6679556611  
 H,0,-2.3679020681,-1.4837127868,0.0515181285  
 H,0,0.5308947731,-0.0833283748,2.1034427616  
 H,0,2.2125422524,-0.8934388349,-0.3299603626  
 H,0,2.8052483639,-0.1303862532,1.1521222102  
 H,0,0.8617975766,-1.7272698338,1.5416318027  
 H,0,-2.0232582509,-0.4907017836,-1.9541621792  
 H,0,-2.6775540913,0.6870445599,-0.8055285603  
 H,0,-1.6794982774,1.2431122153,-2.1672697913

### DBU Model (9) – 6-31+G\*\* Gas Phase

E(RB+HF-LYP) = -345.386270400

|                                              |                             |
|----------------------------------------------|-----------------------------|
| Zero-point correction=                       | 0.179010 (Hartree/Particle) |
| Thermal correction to Energy=                | 0.187330                    |
| Thermal correction to Enthalpy=              | 0.188274                    |
| Thermal correction to Gibbs Free Energy=     | 0.146446                    |
| Sum of electronic and zero-point Energies=   | -345.207260                 |
| Sum of electronic and thermal Energies=      | -345.198940                 |
| Sum of electronic and thermal Enthalpies=    | -345.197996                 |
| Sum of electronic and thermal Free Energies= | -345.239824                 |

|       | E (Thermal)<br>KCal/Mol | CV<br>Cal/Mol-Kelvin | S<br>Cal/Mol-Kelvin |
|-------|-------------------------|----------------------|---------------------|
| Total | 117.551                 | 31.054               | 88.035              |

N,0,-0.4413329394,-0.6710578998,0.3080831445  
 C,0,0.7186126556,-0.6967467463,1.1986810856  
 C,0,1.9538547608,-0.1849283024,0.4639847216  
 C,0,1.642281668,1.1857938114,-0.1430393445  
 N,0,0.3877997417,1.2257202113,-0.8888982944  
 C,0,-0.5334673274,0.3642718441,-0.624117201  
 C,0,-1.8105529586,0.4493117006,-1.4314359616  
 C,0,-1.6228174421,-1.3396314591,0.8326484002  
 H,0,2.4468964304,1.4940719742,-0.8210698888  
 H,0,1.6043051469,1.9495503598,0.6488053433  
 H,0,-1.332784154,-2.3227375654,1.2184088629  
 H,0,-2.0952786082,-0.7789800064,1.6567072158  
 H,0,-2.3669423134,-1.4965889207,0.0521228358  
 H,0,0.528874041,-0.0846569976,2.0979666585  
 H,0,2.2170523023,-0.8916763423,-0.3324398479  
 H,0,2.8055350166,-0.130295042,1.1518044021  
 H,0,0.8637928877,-1.7295988556,1.5378698301  
 H,0,-2.0227144991,-0.4897225748,-1.9555695819  
 H,0,-2.67773988,0.6850617748,-0.8037861214  
 H,0,-1.6837321234,1.2445109256,-2.1654438608

### DBU Model (9) – 6-31G\* - PCM Dichloroethane

E(RB+HF-LYP) = -345.364976362

|                                              |                             |
|----------------------------------------------|-----------------------------|
| Zero-point correction=                       | 0.180034 (Hartree/Particle) |
| Thermal correction to Energy=                | 0.188329                    |
| Thermal correction to Enthalpy=              | 0.189274                    |
| Thermal correction to Gibbs Free Energy=     | 0.147438                    |
| Sum of electronic and zero-point Energies=   | -345.184942                 |
| Sum of electronic and thermal Energies=      | -345.176647                 |
| Sum of electronic and thermal Enthalpies=    | -345.175703                 |
| Sum of electronic and thermal Free Energies= | -345.217539                 |

|       | E (Thermal) | CV             | S              |
|-------|-------------|----------------|----------------|
|       | KCal/Mol    | Cal/Mol-Kelvin | Cal/Mol-Kelvin |
| Total | 118.179     | 30.839         | 88.051         |

N,0,-0.4488270413,-0.6455927148,0.3237632957  
 C,0,0.7185481026,-0.6919958482,1.2048717047  
 C,0,1.9527257492,-0.1884106007,0.4637696135  
 C,0,1.6431421294,1.1809127099,-0.1444683592  
 N,0,0.395625988,1.2183946914,-0.9092641242  
 C,0,-0.5312101866,0.3641675807,-0.6242633699  
 C,0,-1.8113315641,0.4432827732,-1.4296975982  
 C,0,-1.6235724725,-1.3394091449,0.8309064693  
 H,0,2.459496034,1.4939024026,-0.8088668778  
 H,0,1.594685861,1.9400689834,0.6527079453  
 H,0,-1.3219948846,-2.3272601029,1.1967838789  
 H,0,-2.1020497622,-0.8020308671,1.6658021569  
 H,0,-2.3655974348,-1.4878286266,0.0459788885  
 H,0,0.5419686719,-0.0883688245,2.1113011054  
 H,0,2.2102320014,-0.8976676551,-0.3333135245  
 H,0,2.8073679539,-0.1357546682,1.1484865383  
 H,0,0.8553967723,-1.7302836403,1.5323693648  
 H,0,-2.030926683,-0.5020118079,-1.9403367249  
 H,0,-2.6761635169,0.6883421407,-0.8015111496  
 H,0,-1.6898181878,1.2279940102,-2.1776065618

### DBU Model (9) – 6-31+G\*\* - PCM Dichloroethane

E(RB+HF-LYP) = -345.393699812

|                                              |                             |
|----------------------------------------------|-----------------------------|
| Zero-point correction=                       | 0.178755 (Hartree/Particle) |
| Thermal correction to Energy=                | 0.187104                    |
| Thermal correction to Enthalpy=              | 0.188048                    |
| Thermal correction to Gibbs Free Energy=     | 0.146084                    |
| Sum of electronic and zero-point Energies=   | -345.214945                 |
| Sum of electronic and thermal Energies=      | -345.206596                 |
| Sum of electronic and thermal Enthalpies=    | -345.205652                 |
| Sum of electronic and thermal Free Energies= | -345.247616                 |

|       | E (Thermal)<br>KCal/Mol | CV<br>Cal/Mol-Kelvin | S<br>Cal/Mol-Kelvin |
|-------|-------------------------|----------------------|---------------------|
| Total | 117.409                 | 31.080               | 88.321              |

N,0,-0.4497629139,-0.6436122481,0.3219127112  
 C,0,0.719857511,-0.6921150291,1.203481563  
 C,0,1.954082416,-0.1899201448,0.4625885179  
 C,0,1.6479474434,1.1816429909,-0.1408739993  
 N,0,0.398133485,1.2195956769,-0.9063185814  
 C,0,-0.5351134622,0.3646995908,-0.6247594771  
 C,0,-1.814120679,0.4418990924,-1.4302962211  
 C,0,-1.6257460872,-1.3404791301,0.8297578806  
 H,0,2.4614120361,1.4957475005,-0.8061334339  
 H,0,1.5975551558,1.9380531209,0.6578610845  
 H,0,-1.3213161516,-2.3257007021,1.1971289564  
 H,0,-2.1016836338,-0.7988587239,1.6625025811  
 H,0,-2.3675417271,-1.4925178426,0.0464932528  
 H,0,0.5411639899,-0.0858640617,2.1074633975  
 H,0,2.2130241027,-0.8982166053,-0.3347409035  
 H,0,2.8073876232,-0.136870455,1.1483197214  
 H,0,0.8541770143,-1.7299150018,1.5307053819  
 H,0,-2.0333945683,-0.5051915305,-1.9359502592  
 H,0,-2.6760666608,0.6902114762,-0.800801183  
 H,0,-1.6947540294,1.2228746027,-2.1813970897

### Dbu model complex with HOOtBu 6-31G\* Gas Phase

E(RB+HF-LYP) = -654.181398974

|                                              |                             |
|----------------------------------------------|-----------------------------|
| Zero-point correction=                       | 0.322020 (Hartree/Particle) |
| Thermal correction to Energy=                | 0.339778                    |
| Thermal correction to Enthalpy=              | 0.340722                    |
| Thermal correction to Gibbs Free Energy=     | 0.274558                    |
| Sum of electronic and zero-point Energies=   | -653.859379                 |
| Sum of electronic and thermal Energies=      | -653.841621                 |
| Sum of electronic and thermal Enthalpies=    | -653.840677                 |
| Sum of electronic and thermal Free Energies= | -653.906841                 |

|       | E (Thermal)<br>KCal/Mol | CV<br>Cal/Mol-Kelvin | S<br>Cal/Mol-Kelvin |
|-------|-------------------------|----------------------|---------------------|
| Total | 213.214                 | 64.015               | 139.255             |

C,0,-3.5027746004,1.2722240777,0.889972451  
 C,0,-2.3994189,2.324753604,0.934000631  
 C,0,-1.4083667747,2.053185247,-0.1979249749  
 N,0,-0.9501773191,0.6668823699,-0.2333709861  
 C,0,-1.6972426838,-0.2692743072,0.2545645372  
 N,0,-2.9218704255,-0.0698914588,0.867909991  
 C,0,-1.1726620309,-1.6859776496,0.1831842384  
 C,0,-3.8682443572,-1.146950417,1.1094492914  
 O,0,1.3778904737,0.2644213503,-1.7392212725  
 O,0,1.935529294,-0.9322989605,-1.1269194239  
 C,0,3.1435129707,-0.5874370415,-0.4116506928

C,0,3.5860116417,-1.9426028065,0.1532826042  
 C,0,4.1835124769,-0.0308607464,-1.3916690196  
 C,0,2.8395317573,0.4102229134,0.7120188924  
 H,0,3.7415220174,0.6199027646,1.298465989  
 H,0,2.4708449454,1.3504204727,0.293950454  
 H,0,2.0737102356,0.0080830059,1.3843220274  
 H,0,5.1229281263,0.1968221214,-0.8741532142  
 H,0,4.3893758685,-0.7611086364,-2.1816139637  
 H,0,3.8094997342,0.8836666745,-1.858684925  
 H,0,4.5311683058,-1.8366484879,0.6967314107  
 H,0,2.8341342832,-2.3415132533,0.842803458  
 H,0,3.7306993286,-2.6657227274,-0.6560297513  
 H,0,0.5568822279,0.3794799234,-1.1797578789  
 H,0,-0.5263623924,2.6969404622,-0.0999544918  
 H,0,-1.864287558,2.3034346517,-1.1681838727  
 H,0,-4.4504929318,-0.920066631,2.0101809482  
 H,0,-4.5753446986,-1.2740919221,0.2739351253  
 H,0,-3.3553166698,-2.093943257,1.2719603668  
 H,0,-4.1462328894,1.4264270881,0.0076197646  
 H,0,-1.8817918493,2.2666999623,1.8992164731  
 H,0,-2.8331783149,3.3276303583,0.8507047082  
 H,0,-4.1489373361,1.3464424271,1.7736348582  
 H,0,-1.1595399143,-2.1569483637,1.1732070397  
 H,0,-1.7904969885,-2.3104398594,-0.4733687722  
 H,0,-0.154964456,-1.6650795124,-0.2090009664

### Dbu model complex with HOOtBu 6-31+G\*\* Gas Phase

E(RB+HF-LYP) = -654.237108355

|                                              |                             |
|----------------------------------------------|-----------------------------|
| Zero-point correction=                       | 0.319533 (Hartree/Particle) |
| Thermal correction to Energy=                | 0.337504                    |
| Thermal correction to Enthalpy=              | 0.338448                    |
| Thermal correction to Gibbs Free Energy=     | 0.270655                    |
| Sum of electronic and zero-point Energies=   | -653.917576                 |
| Sum of electronic and thermal Energies=      | -653.899604                 |
| Sum of electronic and thermal Enthalpies=    | -653.898660                 |
| Sum of electronic and thermal Free Energies= | -653.966453                 |

|       | E (Thermal)<br>KCal/Mol | CV<br>Cal/Mol-Kelvin | S<br>Cal/Mol-Kelvin |
|-------|-------------------------|----------------------|---------------------|
| Total | 211.787                 | 64.380               | 142.682             |

C,0,-3.324463523,0.7616961321,1.6224688223  
 C,0,-2.1938428749,0.2871502151,2.5303070437  
 C,0,-0.8653350282,0.4147514032,1.7849630824  
 N,0,-0.9032637345,-0.1870076321,0.4522987112  
 C,0,-2.0295112628,-0.3023513703,-0.1739448882  
 N,0,-3.2624404359,0.071990377,0.3318795529  
 C,0,-2.0009862651,-0.9330372497,-1.5480128189  
 C,0,-4.4402999051,0.2333193385,-0.5090806541  
 O,0,1.5184749843,-1.2865559511,-0.2515011101  
 O,0,2.4355213764,-0.2861434892,0.2857942853  
 C,0,3.3313031356,0.1553985301,-0.7597855775  
 C,0,4.2292043082,1.1527920549,-0.0170807062  
 C,0,4.1457360586,-1.0324724816,-1.2886365126  
 C,0,2.5507519504,0.8475759582,-1.8843486071  
 H,0,3.2377624531,1.238710836,-2.6430138074  
 H,0,1.8694308709,0.1419795821,-2.3661973436  
 H,0,1.9632223228,1.6808010391,-1.4846214828  
 H,0,4.8691153109,-0.6977510062,-2.040670088  
 H,0,4.6908345796,-1.5132428196,-0.4700649972  
 H,0,3.4858052947,-1.774587326,-1.7443102886

H,0,4.9800557798,1.5602569031,-0.7018728398  
 H,0,3.6385435225,1.9824544103,0.384024142  
 H,0,4.7458279167,0.6611737719,0.8128538178  
 H,0,0.6373014059,-0.8602315228,-0.0315232495  
 H,0,-0.0560408098,-0.0653201549,2.3446425136  
 H,0,-0.582760407,1.4729223752,1.684937578  
 H,0,-5.3360464847,0.0607056524,0.0963544955  
 H,0,-4.5101542689,1.2456626331,-0.9378417266  
 H,0,-4.4474947677,-0.4884457807,-1.3247693357  
 H,0,-3.2664345505,1.8530145857,1.47485853  
 H,0,-2.3650225452,-0.7604511179,2.8054815827  
 H,0,-2.185002833,0.8742655658,3.4550581626  
 H,0,-4.3018215284,0.5485848929,2.0710913503  
 H,0,-2.6443159316,-1.8182729887,-1.5976768002  
 H,0,-2.3331754202,-0.2321098499,-2.3217558004  
 H,0,-0.9770111645,-1.2323385545,-1.7696727656

### Dbu model complex with HOOtBu 6-31G\* - PCM Dichloroethane

E(RB+HF-LYP) = -654.189415415

|                                              |                             |
|----------------------------------------------|-----------------------------|
| Zero-point correction=                       | 0.320935 (Hartree/Particle) |
| Thermal correction to Energy=                | 0.337944                    |
| Thermal correction to Enthalpy=              | 0.338889                    |
| Thermal correction to Gibbs Free Energy=     | 0.274644                    |
| Sum of electronic and zero-point Energies=   | -653.868481                 |
| Sum of electronic and thermal Energies=      | -653.851471                 |
| Sum of electronic and thermal Enthalpies=    | -653.850527                 |
| Sum of electronic and thermal Free Energies= | -653.914771                 |

|       | E (Thermal) | CV             | S              |
|-------|-------------|----------------|----------------|
|       | KCal/Mol    | Cal/Mol-Kelvin | Cal/Mol-Kelvin |
| Total | 212.063     | 62.153         | 135.214        |

C,0,3.4236333543,1.0122284472,0.5296635944  
 C,0,2.6680301725,1.9996320876,-0.3545850047  
 C,0,1.1732078182,1.687880046,-0.2895070686  
 N,0,0.8781779659,0.276652807,-0.5343840074  
 C,0,1.7758362288,-0.6215129338,-0.2711534047  
 N,0,3.0448118745,-0.3629472465,0.1926459001  
 C,0,1.4026083075,-2.065364973,-0.5271390774  
 C,0,3.9167035778,-1.3977493311,0.7319855758  
 O,0,-1.6313900196,-0.2988373999,-1.4729924112  
 O,0,-2.4344472565,0.6634175261,-0.7302226218  
 C,0,-3.1615368145,-0.0035613829,0.3298522773  
 C,0,-3.9420327987,1.1561672065,0.9608914556  
 C,0,-4.1122662015,-1.0520508543,-0.259100094  
 C,0,-2.1942973488,-0.6285412821,1.3411434292  
 H,0,-2.7465012449,-1.0581782029,2.184936441  
 H,0,-1.6085411231,-1.423408087,0.8724166459  
 H,0,-1.5024006618,0.1278706111,1.7266047437  
 H,0,-4.7031461897,-1.5271658937,0.5325125494  
 H,0,-4.8010516568,-0.5850892159,-0.9720388176  
 H,0,-3.5448706874,-1.8265429666,-0.7820361996  
 H,0,-4.5616925228,0.7890072679,1.7860059715  
 H,0,-3.2572585212,1.9155712398,1.353580992  
 H,0,-4.5968743402,1.6287944055,0.2209204749  
 H,0,-0.7102281871,-0.0879776718,-1.1150585994  
 H,0,0.6215432991,2.2813185836,-1.0283153024  
 H,0,0.7701887362,1.9698224522,0.6951591991  
 H,0,4.958972577,-1.1041331486,0.5676906261  
 H,0,3.7704187694,-1.5404857898,1.8137633475  
 H,0,3.7564850977,-2.352482004,0.2312445731

H,0,3.2208133482,1.2122890701,1.5941741966  
H,0,3.0205863021,1.9044161814,-1.3893260474  
H,0,2.8721662692,3.0254658958,-0.0275792133  
H,0,4.506255478,1.1085582973,0.3835036819  
H,0,2.0799735314,-2.5355053618,-1.2495065169  
H,0,1.4335332869,-2.6603615158,0.3929216057  
H,0,0.3880799914,-2.0971262603,-0.9259974341

### Dbu model complex with HOOtBu 6-31+G\*\* - PCM Dichloroethane

E(RB+HF-LYP) = -654.247510760

|                                              |                             |
|----------------------------------------------|-----------------------------|
| Zero-point correction=                       | 0.318764 (Hartree/Particle) |
| Thermal correction to Energy=                | 0.336621                    |
| Thermal correction to Enthalpy=              | 0.337565                    |
| Thermal correction to Gibbs Free Energy=     | 0.270910                    |
| Sum of electronic and zero-point Energies=   | -653.928747                 |
| Sum of electronic and thermal Energies=      | -653.910890                 |
| Sum of electronic and thermal Enthalpies=    | -653.909946                 |
| Sum of electronic and thermal Free Energies= | -653.976601                 |

|       | E (Thermal) | CV             | S              |
|-------|-------------|----------------|----------------|
|       | KCal/Mol    | Cal/Mol-Kelvin | Cal/Mol-Kelvin |
| Total | 211.233     | 64.268         | 140.287        |

N,0,3.025753471,-0.3611033532,0.3257832003  
C,0,3.5233209625,1.0175924102,0.455963292  
C,0,2.7047177998,1.9790762696,-0.3993250914  
C,0,1.2181970457,1.6895832361,-0.1929331533  
N,0,0.8929074854,0.2900803939,-0.4676207538  
C,0,1.7852330067,-0.6184573895,-0.1959233335  
C,0,1.4185173279,-2.0602407871,-0.4652941182  
C,0,4.003957734,-1.3944448606,0.6458790243  
O,0,-1.5840460104,-0.1150856891,-1.4343931908  
O,0,-2.4024279345,0.7534958416,-0.5971451985  
C,0,-3.2340880421,-0.0391997932,0.2941065411  
C,0,-2.3665382464,-0.8706191973,1.245353042  
C,0,-4.0074087411,1.0421032197,1.0586563515  
C,0,-4.1830944077,-0.9245928772,-0.5213613505  
H,0,-2.9986834445,-1.397043144,1.9688804542  
H,0,-1.7869314985,-1.6134939762,0.6917979552  
H,0,-1.6715319226,-0.2264950582,1.793322871  
H,0,-4.8454587386,-1.4884120174,0.1446043225  
H,0,-4.8006540274,-0.312583818,-1.1871718284  
H,0,-3.615939098,-1.6345823915,-1.1288527477  
H,0,-4.6984603066,0.5727345069,1.7660237785  
H,0,-3.3233113817,1.6870440315,1.6192770409  
H,0,-4.5884771128,1.6637696235,0.3699578771  
H,0,-0.6546971069,0.0200371471,-1.0354019456  
H,0,0.602942917,2.3168736983,-0.8467771331  
H,0,0.9294880561,1.9354386025,0.8412221792  
H,0,4.7459069148,-1.5128876835,-0.1570458339  
H,0,4.5349775821,-1.1096757904,1.5607571894  
H,0,3.5263384438,-2.3560136288,0.8263996437  
H,0,3.4952262247,1.3147377071,1.5145194798  
H,0,2.9580646151,1.842520184,-1.4582338775  
H,0,2.9492188072,3.012423264,-0.1303183972  
H,0,4.5751461519,1.0275219462,0.1435738924  
H,0,2.1426445306,-2.5455019448,-1.1281839843  
H,0,1.3723971496,-2.6422552651,0.4621109276  
H,0,0.4360714742,-2.0890778825,-0.9360190908

### Ts 1 from axial attack with DBU model, orientation A (10) – 6-31G\* - Gas Phase

E(RB+HF-LYP) = -962.824032082

|                                              |                             |
|----------------------------------------------|-----------------------------|
| Zero-point correction=                       | 0.452643 (Hartree/Particle) |
| Thermal correction to Energy=                | 0.476337                    |
| Thermal correction to Enthalpy=              | 0.477281                    |
| Thermal correction to Gibbs Free Energy=     | 0.399425                    |
| Sum of electronic and zero-point Energies=   | -962.371390                 |
| Sum of electronic and thermal Energies=      | -962.347695                 |
| Sum of electronic and thermal Enthalpies=    | -962.346751                 |
| Sum of electronic and thermal Free Energies= | -962.424607                 |

|       | E (Thermal)<br>KCal/Mol | CV<br>Cal/Mol-Kelvin | S<br>Cal/Mol-Kelvin |
|-------|-------------------------|----------------------|---------------------|
| Total | 298.906                 | 89.385               | 163.862             |

C,0,-1.4629132232,2.4728145391,0.8560201038  
 C,0,-0.1961960162,2.2595488381,1.6911625679  
 C,0,1.0580927611,2.7709771263,0.9701820124  
 C,0,1.1634130339,2.3122849699,-0.4931864917  
 C,0,-0.0499894486,2.1277344789,-1.2064038299  
 C,0,-1.2968166282,1.9763832407,-0.5617491825  
 O,0,2.3090097033,2.1730758071,-0.9915796256  
 O,0,-1.4350298739,0.1772618508,-0.4242454119  
 O,0,-2.3574642084,-0.4194265415,0.5572764899  
 C,0,-3.451433967,-1.0813106787,-0.1117877171  
 C,0,-4.2568224011,-0.0813998389,-0.9499058593  
 C,0,-2.921004792,-2.2276166493,-0.9832076809  
 C,0,-4.2884425508,-1.6178558557,1.0567265595  
 H,0,0.0188407183,1.9522085751,-2.2778479135  
 H,0,-2.18757031,2.0983259469,-1.1758112785  
 H,0,-1.7008904926,3.5466503885,0.8028019306  
 H,0,-2.3183097887,1.9755054957,1.3251252042  
 H,0,-0.3021610777,2.7422121568,2.6720726605  
 H,0,-0.0949430089,1.184798366,1.8818677933  
 H,0,1.0620436156,3.8718900889,0.964444933  
 H,0,1.9746045915,2.4649254293,1.489351663  
 H,0,-3.7421327384,-2.7606607291,-1.4764949011  
 H,0,-2.2521230795,-1.8310950249,-1.7518486499  
 H,0,-2.3634699809,-2.9471286934,-0.3719538264  
 H,0,-5.1237177365,-0.5692090399,-1.4110624211  
 H,0,-4.6182025538,0.7405846083,-0.3221768142  
 H,0,-3.6311773757,0.335167449,-1.7434189386  
 H,0,-5.1659723819,-2.157560235,0.6835982966  
 H,0,-3.6974688727,-2.3046871803,1.6725055582  
 H,0,-4.631600177,-0.7950406279,1.6926366944  
 H,0,-0.0046136263,-0.6327829355,-0.5639748955  
 N,0,0.9952083098,-0.9859450311,-0.6142258788  
 C,0,1.7174075868,-0.733768598,-1.8679166275  
 C,0,3.1171903567,-1.3327912292,-1.7951916389  
 H,0,1.1277645548,-1.173354566,-2.6785096053  
 H,0,1.7887766332,0.3505182529,-2.009200717  
 C,0,1.5725665389,-1.2703807158,0.5330639641  
 N,0,2.9097189865,-1.357042485,0.6479024158  
 C,0,3.589523248,-1.6040093125,1.9136207647  
 C,0,3.7534969029,-0.9024206096,-0.4756883902  
 H,0,4.4429086389,-2.2668472472,1.7383264112  
 H,0,3.9615837396,-0.6676076655,2.3496916202  
 H,0,2.9251316196,-2.0858628889,2.6294183161  
 H,0,3.8351269888,0.1918131669,-0.4377337949  
 C,0,0.6748487157,-1.5298257983,1.7143064994  
 H,0,3.0893692739,-2.4279075488,-1.8554055663  
 H,0,3.7178963792,-0.9646979619,-2.6323568935

H,0,4.7443616451,-1.3462693898,-0.3432677762  
H,0,0.7723408682,-2.5718927906,2.0412410293  
H,0,0.9367077738,-0.8844873624,2.5578728782  
H,0,-0.3672405827,-1.3440677964,1.4424913024

### Ts 1 from axial attack with DBU model, orientation A (10) – 6-31+G\*\* - Gas Phase

E(RB+HF-LYP) = -962.900689997

|                                              |                             |
|----------------------------------------------|-----------------------------|
| Zero-point correction=                       | 0.448927 (Hartree/Particle) |
| Thermal correction to Energy=                | 0.473034                    |
| Thermal correction to Enthalpy=              | 0.473978                    |
| Thermal correction to Gibbs Free Energy=     | 0.393922                    |
| Sum of electronic and zero-point Energies=   | -962.451763                 |
| Sum of electronic and thermal Energies=      | -962.427656                 |
| Sum of electronic and thermal Enthalpies=    | -962.426712                 |
| Sum of electronic and thermal Free Energies= | -962.506767                 |

|       | E (Thermal) | CV             | S              |
|-------|-------------|----------------|----------------|
|       | KCal/Mol    | Cal/Mol-Kelvin | Cal/Mol-Kelvin |
| Total | 296.833     | 90.274         | 168.492        |

C,0,-1.5374614185,2.5082830006,0.8697517688  
C,0,-0.2634731615,2.3533851593,1.7070895065  
C,0,0.9730082099,2.8912241497,0.97325309  
C,0,1.0879171489,2.4248353405,-0.4852036433  
C,0,-0.1145117683,2.1587984715,-1.1891193163  
C,0,-1.3599310585,1.976121805,-0.5344218056  
O,0,2.2394972333,2.3441140345,-0.9921550876  
O,0,-1.4143885993,0.2060986549,-0.3662111584  
O,0,-2.3685706112,-0.4225801869,0.5728102078  
C,0,-3.4249255219,-1.1105093193,-0.1375786552  
C,0,-4.2190431113,-0.1335699603,-1.0132933506  
C,0,-2.8426305103,-2.2553508785,-0.9780393775  
C,0,-4.296739567,-1.6553139526,1.0019889165  
H,0,-0.0428319691,1.9680453627,-2.2571336651  
H,0,-2.2512628711,2.0652793176,-1.1529875528  
H,0,-1.8035390392,3.572595704,0.7829898175  
H,0,-2.379989689,2.0038867912,1.3541559749  
H,0,-0.3840090692,2.8558858749,2.675681584  
H,0,-0.1269104684,1.287513335,1.9236777977  
H,0,0.9472249596,3.9909510748,0.95049641  
H,0,1.8994269866,2.6178387796,1.491462446  
H,0,-3.6401845354,-2.809195953,-1.4857691541  
H,0,-2.1619057254,-1.8588880776,-1.7358867428  
H,0,-2.2906970059,-2.9556915592,-0.3413558078  
H,0,-5.0667508375,-0.6432415477,-1.4847833974  
H,0,-4.6060450721,0.6936448298,-0.4096203576  
H,0,-3.5827037625,0.2758337481,-1.8016091713  
H,0,-5.1420137467,-2.219669118,0.5938924345  
H,0,-3.716924211,-2.3217692298,1.6487213955  
H,0,-4.6884712499,-0.8360351771,1.6127125356  
H,0,0.0421249211,-0.5513633567,-0.4879270544  
N,0,1.0349312304,-0.9160069218,-0.561581113  
C,0,1.7376739838,-0.6696403163,-1.8270443717  
C,0,3.0655968786,-1.4179947367,-1.8355171641  
H,0,1.080831708,-1.0030107392,-2.635252684  
H,0,1.9022740486,0.4112190151,-1.921752702  
C,0,1.6259256772,-1.2727272563,0.5572311264  
N,0,2.9560036614,-1.4784623678,0.6225039481  
C,0,3.6590361282,-1.7588677602,1.8711147737  
C,0,3.8053211598,-1.1264135559,-0.5325992983  
H,0,4.4486628449,-2.4911086914,1.6790197102

H,0,4.1197097511,-0.8478725944,2.2742171422  
H,0,2.986061472,-2.1735118,2.6189192738  
H,0,4.0692030571,-0.0625343056,-0.4726431123  
C,0,0.7541615932,-1.4711237679,1.7682271053  
H,0,2.9099277742,-2.4988533668,-1.9382875981  
H,0,3.6716338314,-1.0846372226,-2.6827007651  
H,0,4.7215419358,-1.7188866071,-0.4570392855  
H,0,0.7999152532,-2.5124453954,2.1045436307  
H,0,1.0790348615,-0.8318403943,2.5939093135  
H,0,-0.2817305511,-1.2287322208,1.5233022172

### Ts 1 from axial attack with DBU model, orientation A (10) – 6-31G\* - PCM Dichloroethane

E(RB+HF-LYP) = -962.843277653

|                                              |                             |
|----------------------------------------------|-----------------------------|
| Zero-point correction=                       | 0.450769 (Hartree/Particle) |
| Thermal correction to Energy=                | 0.474956                    |
| Thermal correction to Enthalpy=              | 0.475900                    |
| Thermal correction to Gibbs Free Energy=     | 0.395556                    |
| Sum of electronic and zero-point Energies=   | -962.392509                 |
| Sum of electronic and thermal Energies=      | -962.368322                 |
| Sum of electronic and thermal Enthalpies=    | -962.367378                 |
| Sum of electronic and thermal Free Energies= | -962.447722                 |

|       |   | E (Thermal) |           | CV             | S              |
|-------|---|-------------|-----------|----------------|----------------|
|       |   | KCal/Mol    |           | Cal/Mol-Kelvin | Cal/Mol-Kelvin |
| Total |   | 298.039     |           | 89.885         | 169.098        |
| 1     | 6 | 0           | -1.930779 | 2.084752       | 1.237219       |
| 2     | 6 | 0           | -0.548327 | 2.178429       | 1.890486       |
| 3     | 6 | 0           | 0.308142  | 3.264999       | 1.230129       |
| 4     | 6 | 0           | 0.333647  | 3.186130       | -0.303105      |
| 5     | 6 | 0           | -0.793518 | 2.601913       | -0.951520      |
| 6     | 6 | 0           | -1.824046 | 1.961152       | -0.260835      |
| 7     | 8 | 0           | 1.304989  | 3.695716       | -0.911129      |
| 8     | 8 | 0           | -1.390728 | 0.060578       | -0.434560      |
| 9     | 8 | 0           | -2.070568 | -0.880062      | 0.454478       |
| 10    | 6 | 0           | -2.952250 | -1.740336      | -0.300983      |
| 11    | 6 | 0           | -4.022478 | -0.911007      | -1.020558      |
| 12    | 6 | 0           | -2.141061 | -2.577354      | -1.298897      |
| 13    | 6 | 0           | -3.582007 | -2.626185      | 0.780851       |
| 14    | 1 | 0           | -0.804217 | 2.628563       | -2.040688      |
| 15    | 1 | 0           | -2.764734 | 1.803300       | -0.781987      |
| 16    | 1 | 0           | -2.515378 | 2.991711       | 1.464629       |
| 17    | 1 | 0           | -2.491663 | 1.231773       | 1.632011       |
| 18    | 1 | 0           | -0.644058 | 2.365220       | 2.968156       |
| 19    | 1 | 0           | -0.050436 | 1.207937       | 1.777291       |
| 20    | 1 | 0           | -0.082096 | 4.261008       | 1.495490       |
| 21    | 1 | 0           | 1.344431  | 3.237310       | 1.588181       |
| 22    | 1 | 0           | -2.794738 | -3.229743      | -1.889432      |
| 23    | 1 | 0           | -1.597959 | -1.914527      | -1.977703      |
| 24    | 1 | 0           | -1.414423 | -3.207048      | -0.772065      |
| 25    | 1 | 0           | -4.725734 | -1.562377      | -1.552782      |
| 26    | 1 | 0           | -4.587561 | -0.309213      | -0.299692      |
| 27    | 1 | 0           | -3.552792 | -0.239218      | -1.743349      |
| 28    | 1 | 0           | -4.277351 | -3.343520      | 0.330928       |
| 29    | 1 | 0           | -2.810251 | -3.187525      | 1.319189       |
| 30    | 1 | 0           | -4.133623 | -2.016862      | 1.505073       |
| 31    | 1 | 0           | 0.160919  | -0.274457      | -0.348149      |
| 32    | 7 | 0           | 1.215426  | -0.462579      | -0.416311      |
| 33    | 6 | 0           | 1.920533  | 0.175609       | -1.530531      |
| 34    | 6 | 0           | 3.167059  | -0.631390      | -1.876096      |
| 35    | 1 | 0           | 1.221204  | 0.217945       | -2.370489      |

|    |   |   |           |           |           |
|----|---|---|-----------|-----------|-----------|
| 36 | 1 | 0 | 2.166556  | 1.210472  | -1.263794 |
| 37 | 6 | 0 | 1.807249  | -1.216427 | 0.486676  |
| 38 | 7 | 0 | 3.129086  | -1.445355 | 0.461003  |
| 39 | 6 | 0 | 3.840139  | -2.223883 | 1.473326  |
| 40 | 6 | 0 | 3.978699  | -0.889985 | -0.610146 |
| 41 | 1 | 0 | 4.184467  | -3.175794 | 1.051454  |
| 42 | 1 | 0 | 4.713402  | -1.654901 | 1.810207  |
| 43 | 1 | 0 | 3.208909  | -2.424157 | 2.336708  |
| 44 | 1 | 0 | 4.449478  | 0.032914  | -0.244748 |
| 45 | 6 | 0 | 0.942774  | -1.819260 | 1.562175  |
| 46 | 1 | 0 | 2.879400  | -1.587260 | -2.330405 |
| 47 | 1 | 0 | 3.783833  | -0.089866 | -2.600158 |
| 48 | 1 | 0 | 4.776093  | -1.615335 | -0.803195 |
| 49 | 1 | 0 | 1.088073  | -2.903164 | 1.614323  |
| 50 | 1 | 0 | 1.196010  | -1.397768 | 2.541759  |
| 51 | 1 | 0 | -0.109532 | -1.612685 | 1.350939  |

### Ts 1 from axial attack with DBU model, orientation A (10) – 6-31+G\*\* - PCM Dichloroethane

E(RB+HF-LYP) = -962.924990533

|                                              |                             |
|----------------------------------------------|-----------------------------|
| Zero-point correction=                       | 0.447370 (Hartree/Particle) |
| Thermal correction to Energy=                | 0.470821                    |
| Thermal correction to Enthalpy=              | 0.471765                    |
| Thermal correction to Gibbs Free Energy=     | 0.393708                    |
| Sum of electronic and zero-point Energies=   | -962.477620                 |
| Sum of electronic and thermal Energies=      | -962.454169                 |
| Sum of electronic and thermal Enthalpies=    | -962.453225                 |
| Sum of electronic and thermal Free Energies= | -962.531282                 |

|       | E (Thermal) |   | CV             |           | S              |
|-------|-------------|---|----------------|-----------|----------------|
|       | KCal/Mol    |   | Cal/Mol-Kelvin |           | Cal/Mol-Kelvin |
| Total | 295.445     |   | 88.485         |           | 164.285        |
| 1     | 6           | 0 | -2.196604      | 1.589361  | 1.442786       |
| 2     | 6           | 0 | -0.843478      | 2.157675  | 1.882118       |
| 3     | 6           | 0 | -0.516227      | 3.457348  | 1.136337       |
| 4     | 6           | 0 | -0.733717      | 3.379641  | -0.376712      |
| 5     | 6           | 0 | -1.643262      | 2.407452  | -0.876904      |
| 6     | 6           | 0 | -2.286117      | 1.474689  | -0.056139      |
| 7     | 8           | 0 | -0.152554      | 4.230613  | -1.106479      |
| 8     | 8           | 0 | -1.306285      | -0.215609 | -0.352986      |
| 9     | 8           | 0 | -1.748319      | -1.335862 | 0.474307       |
| 10    | 6           | 0 | -2.394729      | -2.356342 | -0.328097      |
| 11    | 6           | 0 | -3.623314      | -1.784943 | -1.046118      |
| 12    | 6           | 0 | -1.398309      | -2.950789 | -1.332431      |
| 13    | 6           | 0 | -2.809956      | -3.400019 | 0.716789       |
| 14    | 1           | 0 | -1.832341      | 2.406458  | -1.949529      |
| 15    | 1           | 0 | -3.182745      | 0.996108  | -0.436604      |
| 16    | 1           | 0 | -3.009409      | 2.254360  | 1.778448       |
| 17    | 1           | 0 | -2.380767      | 0.608946  | 1.892704       |
| 18    | 1           | 0 | -0.832722      | 2.328477  | 2.965865       |
| 19    | 1           | 0 | -0.068374      | 1.412492  | 1.667997       |
| 20    | 1           | 0 | -1.156309      | 4.274699  | 1.504300       |
| 21    | 1           | 0 | 0.517984       | 3.774050  | 1.315480       |
| 22    | 1           | 0 | -1.871314      | -3.744320 | -1.921593      |
| 23    | 1           | 0 | -1.043639      | -2.173823 | -2.014507      |
| 24    | 1           | 0 | -0.535642      | -3.378375 | -0.810099      |
| 25    | 1           | 0 | -4.142073      | -2.574337 | -1.601394      |
| 26    | 1           | 0 | -4.324960      | -1.354530 | -0.323713      |
| 27    | 1           | 0 | -3.322617      | -1.006041 | -1.751321      |
| 28    | 1           | 0 | -3.309043      | -4.244000 | 0.229015       |
| 29    | 1           | 0 | -1.935569      | -3.781964 | 1.253944       |

|    |   |   |           |           |           |
|----|---|---|-----------|-----------|-----------|
| 30 | 1 | 0 | -3.501192 | -2.964158 | 1.445484  |
| 31 | 1 | 0 | 0.262622  | -0.229771 | -0.286772 |
| 32 | 7 | 0 | 1.335784  | -0.206811 | -0.368401 |
| 33 | 6 | 0 | 1.893917  | 0.554340  | -1.487806 |
| 34 | 6 | 0 | 3.225068  | -0.057695 | -1.910321 |
| 35 | 1 | 0 | 1.160755  | 0.532130  | -2.298192 |
| 36 | 1 | 0 | 2.022435  | 1.602584  | -1.189418 |
| 37 | 6 | 0 | 2.083764  | -0.851711 | 0.505897  |
| 38 | 7 | 0 | 3.423358  | -0.853636 | 0.426947  |
| 39 | 6 | 0 | 4.292858  | -1.494057 | 1.415052  |
| 40 | 6 | 0 | 4.130706  | -0.195718 | -0.690994 |
| 41 | 1 | 0 | 4.736921  | -2.406991 | 1.000778  |
| 42 | 1 | 0 | 5.098329  | -0.800862 | 1.676866  |
| 43 | 1 | 0 | 3.749038  | -1.742005 | 2.323654  |
| 44 | 1 | 0 | 4.489809  | 0.784944  | -0.350688 |
| 45 | 6 | 0 | 1.380582  | -1.591757 | 1.610894  |
| 46 | 1 | 0 | 3.054898  | -1.042246 | -2.361602 |
| 47 | 1 | 0 | 3.715107  | 0.572808  | -2.658494 |
| 48 | 1 | 0 | 5.007345  | -0.807664 | -0.927468 |
| 49 | 1 | 0 | 1.724240  | -2.629062 | 1.664294  |
| 50 | 1 | 0 | 1.581267  | -1.118518 | 2.578243  |
| 51 | 1 | 0 | 0.304149  | -1.584253 | 1.429658  |

### Intermediate from axial attack with DBU model, orientation A (11) – 6-31G\* Gas Phase

E(RB+HF-LYP) = -962.827702437

|                                              |                             |
|----------------------------------------------|-----------------------------|
| Zero-point correction=                       | 0.454296 (Hartree/Particle) |
| Thermal correction to Energy=                | 0.478235                    |
| Thermal correction to Enthalpy=              | 0.479179                    |
| Thermal correction to Gibbs Free Energy=     | 0.400711                    |
| Sum of electronic and zero-point Energies=   | -962.373406                 |
| Sum of electronic and thermal Energies=      | -962.349467                 |
| Sum of electronic and thermal Enthalpies=    | -962.348523                 |
| Sum of electronic and thermal Free Energies= | -962.426991                 |

|       | E (Thermal) | CV             | S              |
|-------|-------------|----------------|----------------|
|       | KCal/Mol    | Cal/Mol-Kelvin | Cal/Mol-Kelvin |
| Total | 300.097     | 90.765         | 165.151        |

C,0,-1.4206363323,2.4546982925,1.1473376434  
 C,0,-0.1227263744,2.2183812991,1.9253824503  
 C,0,1.1125726508,2.5952318564,1.0956916452  
 C,0,1.0884391421,2.1112076017,-0.3659298622  
 C,0,-0.154798348,1.8637645068,-0.9577603902  
 C,0,-1.4080938875,1.7377020934,-0.2006262174  
 O,0,2.2102109366,2.015469041,-0.9575486919  
 O,0,-1.5068216326,0.2449635562,0.0050508937  
 O,0,-2.7881115725,-0.1440113165,0.6985761463  
 C,0,-3.5850726499,-0.9746341532,-0.1645078802  
 C,0,-3.947991866,-0.249521605,-1.4661423143  
 C,0,-2.860933017,-2.2983535173,-0.4529145707  
 C,0,-4.8364489885,-1.2209406912,0.6916294782  
 H,0,-0.1830635543,1.6515774448,-2.025058952  
 H,0,-2.3014071251,2.0000476588,-0.77979941  
 H,0,-1.5459406389,3.5281172861,0.946789862  
 H,0,-2.2894605061,2.1281180453,1.7298582057  
 H,0,-0.1389389331,2.7798415542,2.8695637422  
 H,0,-0.0761509575,1.1570907642,2.1998421344  
 H,0,1.2185758808,3.6903628688,1.0637479573  
 H,0,2.034998381,2.2230397333,1.5614921136  
 H,0,-3.5002327971,-2.9769681387,-1.0295768432  
 H,0,-1.9477137972,-2.1236432626,-1.0298718369  
 H,0,-2.5903663896,-2.7948942868,0.4857544245

H,0,-4.6034898593,-0.8730781984,-2.0855138157  
H,0,-4.4695262413,0.6887369911,-1.2497992241  
H,0,-3.0469794491,-0.0197946526,-2.0417141522  
H,0,-5.5413965696,-1.8683727542,0.1581239326  
H,0,-4.567505383,-1.7044535562,1.6365278764  
H,0,-5.3368705181,-0.2744688218,0.9194335905  
H,0,0.1173214904,-0.6754868366,-0.6459951309  
N,0,1.0794474142,-1.0288274897,-0.7485720637  
C,0,1.7377642992,-0.7202387207,-2.0269589645  
C,0,3.1613303641,-1.262797555,-2.0148250854  
H,0,1.1358042342,-1.165644741,-2.8248939178  
H,0,1.7668662481,0.3742588883,-2.1211518919  
C,0,1.7205066168,-1.255065291,0.3851881955  
N,0,3.0587904854,-1.3031641073,0.4343695162  
C,0,3.7918466902,-1.5056718541,1.679593428  
C,0,3.8345234094,-0.8071519404,-0.7225192335  
H,0,4.7190997136,-2.0412879715,1.4575620898  
H,0,4.0469016064,-0.5470964855,2.149896682  
H,0,3.2137291549,-2.1050501705,2.3825356437  
H,0,3.8522137681,0.2900504709,-0.6770592616  
C,0,0.8870974484,-1.4952476306,1.6139519691  
H,0,3.1793261397,-2.357792817,-2.0823381562  
H,0,3.7083479379,-0.8637997893,-2.8744143176  
H,0,4.8487183701,-1.2058178015,-0.6336605895  
H,0,0.9354025543,-2.5505448485,1.9075775135  
H,0,1.2393514289,-0.8894102556,2.4526729355  
H,0,-0.1517762823,-1.2292415319,1.4107180951

### Intermediate from axial attack with DBU model, orientation A (11) – 6-31+G\*\* Gas Phase

E(RB+HF-LYP) = -962.903855215

|                                              |                             |
|----------------------------------------------|-----------------------------|
| Zero-point correction=                       | 0.450992 (Hartree/Particle) |
| Thermal correction to Energy=                | 0.475214                    |
| Thermal correction to Enthalpy=              | 0.476159                    |
| Thermal correction to Gibbs Free Energy=     | 0.396692                    |
| Sum of electronic and zero-point Energies=   | -962.452864                 |
| Sum of electronic and thermal Energies=      | -962.428641                 |
| Sum of electronic and thermal Enthalpies=    | -962.427697                 |
| Sum of electronic and thermal Free Energies= | -962.507163                 |

|       | E (Thermal) | CV             | S              |
|-------|-------------|----------------|----------------|
|       | KCal/Mol    | Cal/Mol-Kelvin | Cal/Mol-Kelvin |
| Total | 298.202     | 91.600         | 167.251        |

C,0,-1.4582449036,2.4567701651,1.144188616  
C,0,-0.1940555279,2.2001517827,1.9701795662  
C,0,1.0820338396,2.5489416419,1.189051888  
C,0,1.1011869844,2.0860728707,-0.2775048721  
C,0,-0.1215522588,1.8719131649,-0.9216642196  
C,0,-1.4019423315,1.7487319552,-0.2073481077  
O,0,2.2464978037,1.9688847742,-0.8286752888  
O,0,-1.5177639768,0.2487289513,-0.0158225888  
O,0,-2.8130152534,-0.1351844247,0.649374237  
C,0,-3.6137132952,-0.9474717739,-0.2356858915  
C,0,-3.9725746036,-0.1887535338,-1.5197511431  
C,0,-2.8934927969,-2.2659298481,-0.5560136309  
C,0,-4.8671876108,-1.2108806222,0.6121226402  
H,0,-0.1142986061,1.669901427,-1.9904669454  
H,0,-2.2705164409,2.0187483474,-0.8181681186  
H,0,-1.5638202321,3.5316553992,0.9426622822  
H,0,-2.3513699517,2.1374992125,1.6920873943  
H,0,-0.2344460978,2.7678415345,2.9092148801  
H,0,-0.180235288,1.1403635406,2.2513714247

H,0,1.221991022,3.639769506,1.1677902038  
 H,0,1.9748678972,2.1459617216,1.6845039638  
 H,0,-3.5417655423,-2.9270607029,-1.1418092837  
 H,0,-1.9863111865,-2.08216237,-1.1383126245  
 H,0,-2.6185671884,-2.7842575093,0.3687194077  
 H,0,-4.6263990737,-0.7989368738,-2.1528874247  
 H,0,-4.4950566946,0.7432102733,-1.2826583898  
 H,0,-3.0718427512,0.053089214,-2.0899907715  
 H,0,-5.5701900427,-1.8409227469,0.0567939959  
 H,0,-4.603131523,-1.7216383154,1.5432504403  
 H,0,-5.3662423267,-0.2701458154,0.8627228287  
 H,0,0.1040109096,-0.7648035386,-0.5399136296  
 N,0,1.0718404662,-1.0845375857,-0.6760402151  
 C,0,1.6573224871,-0.8201778821,-1.997717022  
 C,0,3.0814747063,-1.3589469955,-2.045158221  
 H,0,1.0164674269,-1.2961096324,-2.7454168751  
 H,0,1.6655281432,0.2661754485,-2.1400321581  
 C,0,1.779269095,-1.244871127,0.4308939211  
 N,0,3.1175501111,-1.2765296596,0.4098883346  
 C,0,3.919380343,-1.3656249532,1.6282903143  
 C,0,3.8323925701,-0.856335814,-0.8153237949  
 H,0,4.8415052073,-1.9062638936,1.4011666468  
 H,0,4.1803871281,-0.3661507489,1.9975810404  
 H,0,3.3908417595,-1.9103319204,2.4090053867  
 H,0,3.8779609781,0.2407610996,-0.8213609679  
 C,0,1.017858089,-1.4301475019,1.7139493699  
 H,0,3.0932699774,-2.4554773143,-2.0731879216  
 H,0,3.5771514743,-0.9944788104,-2.9493681208  
 H,0,4.8405489828,-1.275592098,-0.7651121293  
 H,0,1.1344824126,-2.45522988,2.0820590016  
 H,0,1.3762830327,-0.7442235576,2.4847598485  
 H,0,-0.0415147526,-1.2338038609,1.5439924266

### Intermediate from axial attack with DBU model, orientation A (11) – 6-31G\* – PCM Dichloroethane

E(RB+HF-LYP) = -962.849221182

|                                              |                             |
|----------------------------------------------|-----------------------------|
| Zero-point correction=                       | 0.453209 (Hartree/Particle) |
| Thermal correction to Energy=                | 0.477490                    |
| Thermal correction to Enthalpy=              | 0.478434                    |
| Thermal correction to Gibbs Free Energy=     | 0.397738                    |
| Sum of electronic and zero-point Energies=   | -962.396013                 |
| Sum of electronic and thermal Energies=      | -962.371731                 |
| Sum of electronic and thermal Enthalpies=    | -962.370787                 |
| Sum of electronic and thermal Free Energies= | -962.451483                 |

|       | E (Thermal) | CV             | S              |
|-------|-------------|----------------|----------------|
|       | KCal/Mol    | Cal/Mol-Kelvin | Cal/Mol-Kelvin |
| Total | 299.630     | 90.957         | 169.840        |

C,0,-1.7487249329,2.277775,1.1812809146  
 C,0,-0.3723269329,2.284246,1.8506309146  
 C,0,0.6539310671,3.036556,0.9964679146  
 C,0,0.6357970671,2.67255,-0.5000670854  
 C,0,-0.5338649329,2.126398,-1.0325430854  
 C,0,-1.6852469329,1.682136,-0.2240540854  
 O,0,1.6880570671,2.945929,-1.1658130854  
 O,0,-1.4821769329,0.195797,-0.1503290854  
 O,0,-2.5643729329,-0.495811,0.6225569146  
 C,0,-3.2893679329,-1.397773,-0.2440600854  
 C,0,-3.9747729329,-0.638692,-1.3858430854  
 C,0,-2.3548009329,-2.486558,-0.7876250854  
 C,0,-4.3275089329,-2.000043,0.7138559146

H,0,-0.5601479329,1.925133,-2.1037610854  
 H,0,-2.6513519329,1.806819,-0.7303190854  
 H,0,-2.1253569329,3.307155,1.0912269146  
 H,0,-2.4760109329,1.718654,1.7803149146  
 H,0,-0.4371329329,2.722677,2.8558949146  
 H,0,-0.0453319329,1.245229,1.9853169146  
 H,0,0.4775420671,4.121743,1.0740659146  
 H,0,1.6745030671,2.872278,1.3657899146  
 H,0,-2.9148479329,-3.211071,-1.3896870854  
 H,0,-1.5780649329,-2.046698,-1.4199050854  
 H,0,-1.8725599329,-3.025284,0.0358009146  
 H,0,-4.5803519329,-1.323474,-1.9908120854  
 H,0,-4.6317919329,0.142498,-0.9885310854  
 H,0,-3.2318459329,-0.171189,-2.0381970854  
 H,0,-4.9470929329,-2.732008,0.1841599146  
 H,0,-3.8338219329,-2.505638,1.5505689146  
 H,0,-4.9809339329,-1.219172,1.1166759146  
 H,0,0.2439190671,-0.378083,-0.4094470854  
 N,0,1.2268910671,-0.667037,-0.5231220854  
 C,0,1.8896850671,-0.252399,-1.7671870854  
 C,0,3.2346140671,-0.960515,-1.8850690854  
 H,0,1.2291610671,-0.537232,-2.5928470854  
 H,0,1.9774990671,0.843321,-1.7690530854  
 C,0,1.8326740671,-1.188247,0.5285689146  
 N,0,3.1571660671,-1.371327,0.5487569146  
 C,0,3.8851750671,-1.932226,1.6856429146  
 C,0,3.9904410671,-0.87011,-0.5622730854  
 H,0,4.5099390671,-2.763056,1.3413149146  
 H,0,4.5324910671,-1.166722,2.1297429146  
 H,0,3.2043520671,-2.302473,2.4494439146  
 H,0,4.2812950671,0.166466,-0.3446700854  
 C,0,0.9710440671,-1.578795,1.7004449146  
 H,0,3.0897590671,-2.015683,-2.1468280854  
 H,0,3.8306260671,-0.499128,-2.6786480854  
 H,0,4.9000000671,-1.477316,-0.5886190854  
 H,0,1.0279550671,-2.658963,1.8746889146  
 H,0,1.2959760671,-1.069579,2.6132339146  
 H,0,-0.0693139329,-1.313794,1.5032999146

### Intermediate from axial attack with DBU model, orientation A (11) – 6-31+G\*\* - PCM Dichloroethane

E(RB+HF-LYP) = -962.932821155

|                                              |                             |
|----------------------------------------------|-----------------------------|
| Zero-point correction=                       | 0.450061 (Hartree/Particle) |
| Thermal correction to Energy=                | 0.474516                    |
| Thermal correction to Enthalpy=              | 0.475460                    |
| Thermal correction to Gibbs Free Energy=     | 0.394258                    |
| Sum of electronic and zero-point Energies=   | -962.482760                 |
| Sum of electronic and thermal Energies=      | -962.458305                 |
| Sum of electronic and thermal Enthalpies=    | -962.457361                 |
| Sum of electronic and thermal Free Energies= | -962.538563                 |

|       | E (Thermal) | CV             | S              |
|-------|-------------|----------------|----------------|
|       | KCal/Mol    | Cal/Mol-Kelvin | Cal/Mol-Kelvin |
| Total | 297.763     | 91.577         | 170.904        |

C,0,-1.7285224066,2.2514444949,1.2362915408  
 C,0,-0.3060877187,2.334185592,1.7964241962  
 C,0,0.5993325053,3.170632243,0.8837861176  
 C,0,0.4621671227,2.8639884112,-0.6135980609  
 C,0,-0.6736870996,2.2005676627,-1.0646743775  
 C,0,-1.7407826471,1.6778156158,-0.1807554687  
 O,0,1.4097341533,3.2924638835,-1.3727976158

O,0,-1.4777461051,0.2020372387,-0.149067645  
O,0,-2.5373797149,-0.5215252184,0.6099304879  
C,0,-3.2319523715,-1.4487411299,-0.2662917077  
C,0,-3.9254190641,-0.7083300973,-1.4153587427  
C,0,-2.260541874,-2.5112302213,-0.7967425273  
C,0,-4.2612402529,-2.0767641016,0.6832105216  
H,0,-0.7710389425,2.0192318785,-2.1349727487  
H,0,-2.7424148922,1.771282707,-0.6178873949  
H,0,-2.170839739,3.2569256264,1.1928090922  
H,0,-2.372671772,1.6437689051,1.8810358849  
H,0,-0.3187493389,2.7516646355,2.8116322041  
H,0,0.0980392037,1.3177613467,1.8833598423  
H,0,0.3775699662,4.2411639212,1.0160525757  
H,0,1.6554212243,3.047560026,1.1559296897  
H,0,-2.7987801915,-3.255806507,-1.3931424239  
H,0,-1.4965021898,-2.0555462484,-1.4323624279  
H,0,-1.7673067666,-3.0289367361,0.0326799739  
H,0,-4.4943394531,-1.4154041588,-2.029008321  
H,0,-4.6179559082,0.0456057831,-1.027811174  
H,0,-3.1904008888,-0.214303354,-2.0563712345  
H,0,-4.8551865731,-2.8227300743,0.1447526398  
H,0,-3.7642750374,-2.5722017397,1.5233335051  
H,0,-4.9398343766,-1.3146217662,1.0789729531  
H,0,0.2906997399,-0.3582911094,-0.327359847  
N,0,1.2803641477,-0.6183850742,-0.4279150846  
C,0,1.9694658929,-0.1762066098,-1.6472664216  
C,0,3.2446886622,-0.9917893523,-1.8265660999  
H,0,1.2813023711,-0.3281939011,-2.4835921043  
H,0,2.1619473046,0.9011043089,-1.5781764892  
C,0,1.8621813917,-1.2249784923,0.594097683  
N,0,3.1738550304,-1.4793212018,0.597088524  
C,0,3.879029033,-2.1119888367,1.7135237989  
C,0,4.0306558048,-1.0279766316,-0.5196616508  
H,0,4.4059693995,-3.0012408855,1.3532680681  
H,0,4.6119948667,-1.4114057515,2.1286973859  
H,0,3.1922485531,-2.4082580031,2.502550681  
H,0,4.4387791039,-0.0387109014,-0.2724831904  
C,0,0.9858070405,-1.6218597915,1.7507605146  
H,0,2.998463997,-2.0154947978,-2.1328966478  
H,0,3.8643786047,-0.5487175253,-2.6117652929  
H,0,4.8685877206,-1.7274748351,-0.590048748  
H,0,1.0075984194,-2.706707013,1.895360331  
H,0,1.3239257592,-1.1475566042,2.6770632735  
H,0,-0.0435951878,-1.3169430562,1.5585681596

## Ts 2 from axial attack with DBU model, orientation A (12) – 6-31G\* - Gas Phase

E(RB+HF-LYP) = -962.822771071

|                                              |                             |
|----------------------------------------------|-----------------------------|
| Zero-point correction=                       | 0.452274 (Hartree/Particle) |
| Thermal correction to Energy=                | 0.476067                    |
| Thermal correction to Enthalpy=              | 0.477011                    |
| Thermal correction to Gibbs Free Energy=     | 0.398497                    |
| Sum of electronic and zero-point Energies=   | -962.370497                 |
| Sum of electronic and thermal Energies=      | -962.346704                 |
| Sum of electronic and thermal Enthalpies=    | -962.345760                 |
| Sum of electronic and thermal Free Energies= | -962.424274                 |

|       | E (Thermal)<br>KCal/Mol | CV<br>Cal/Mol-Kelvin | S<br>Cal/Mol-Kelvin |
|-------|-------------------------|----------------------|---------------------|
| Total | 298.736                 | 89.428               | 165.246             |

C,0,-1.8042348647,2.3699884006,1.138601134

C,0,-0.3839926168,2.4379513141,1.7093511269  
 C,0,0.5507990684,3.2514924264,0.8043689148  
 C,0,0.4890272201,2.8713725298,-0.6831441008  
 C,0,-0.7458124322,2.3516325274,-1.1833257506  
 C,0,-1.813609273,1.8554570056,-0.2974398267  
 O,0,1.4873549036,3.0894371541,-1.401406958  
 O,0,-1.3060027221,0.5219837402,-0.4286528848  
 O,0,-2.1942635608,-0.7277042016,0.6197156565  
 C,0,-2.9483633404,-1.5875473961,-0.1960477023  
 C,0,-4.0363173742,-0.8159476809,-0.9673811679  
 C,0,-2.0523376633,-2.3604273809,-1.1853832709  
 C,0,-3.6167735755,-2.5772277932,0.7869288228  
 H,0,-0.8403789777,2.2070855856,-2.2546094101  
 H,0,-2.8233447397,1.9036974418,-0.7227299212  
 H,0,-2.2609330733,3.3703521047,1.1448706768  
 H,0,-2.434729336,1.7104792295,1.7442940329  
 H,0,-0.4005229215,2.8625505033,2.7215963068  
 H,0,0.001030035,1.4155423869,1.8075201008  
 H,0,0.2891363771,4.3191759604,0.8673201371  
 H,0,1.596238391,3.1766841936,1.1261453107  
 H,0,-2.6325570002,-3.0573907212,-1.8033227543  
 H,0,-1.5406804754,-1.6552979189,-1.8480448076  
 H,0,-1.2945698523,-2.9397223257,-0.6428567102  
 H,0,-4.6932913718,-1.4928027836,-1.5284308409  
 H,0,-4.6509135997,-0.2372738442,-0.2688509295  
 H,0,-3.5738310209,-0.121409487,-1.675509213  
 H,0,-4.244342575,-3.3022758436,0.2527574654  
 H,0,-2.8560426122,-3.1284987923,1.3511168129  
 H,0,-4.242967386,-2.0328310535,1.5014032794  
 H,0,0.2276384867,-0.0767626797,-0.3332745609  
 N,0,1.2082877106,-0.4479843183,-0.3808162472  
 C,0,1.9967846538,-0.0564030846,-1.5543248889  
 C,0,3.1661462614,-1.0186914222,-1.721953934  
 H,0,1.32186257,-0.0878600016,-2.4136315774  
 H,0,2.3134529515,0.9873715355,-1.4437363322  
 C,0,1.6629116965,-1.1499823642,0.6331500347  
 N,0,2.949079077,-1.5489558181,0.6821669575  
 C,0,3.5427102834,-2.232628502,1.8258247284  
 C,0,3.8919283033,-1.1827402623,-0.3889414841  
 H,0,3.9311091758,-3.2121470861,1.5222387773  
 H,0,4.3749523469,-1.6372164189,2.2204709793  
 H,0,2.8149452148,-2.3738723441,2.6215683927  
 H,0,4.4109068336,-0.2558887111,-0.1084058539  
 C,0,0.6935367639,-1.4983046835,1.7296832044  
 H,0,2.8075780634,-1.9971019858,-2.063388684  
 H,0,3.8632195904,-0.6389010906,-2.4747523082  
 H,0,4.6428803822,-1.9775332802,-0.4487097412  
 H,0,0.740247809,-2.5680777814,1.957484341  
 H,0,0.9345548443,-0.945462205,2.6450345173  
 H,0,-0.3333432729,-1.2537269779,1.4199359952

## Ts 2 from axial attack with DBU model, orientation A (12) – 6-31+G\*\* - Gas Phase

E(RB+HF-LYP) = -962.899796469

|                                              |                             |
|----------------------------------------------|-----------------------------|
| Zero-point correction=                       | 0.448861 (Hartree/Particle) |
| Thermal correction to Energy=                | 0.472906                    |
| Thermal correction to Enthalpy=              | 0.473851                    |
| Thermal correction to Gibbs Free Energy=     | 0.394685                    |
| Sum of electronic and zero-point Energies=   | -962.450936                 |
| Sum of electronic and thermal Energies=      | -962.426890                 |
| Sum of electronic and thermal Enthalpies=    | -962.425946                 |
| Sum of electronic and thermal Free Energies= | -962.505111                 |

|       | E (Thermal) | CV             | S              |
|-------|-------------|----------------|----------------|
|       | KCal/Mol    | Cal/Mol-Kelvin | Cal/Mol-Kelvin |
| Total | 296.753     | 90.250         | 166.617        |

C,0,-1.8219827801,2.3823585275,1.1462088355  
 C,0,-0.4156148268,2.4411258503,1.7518379648  
 C,0,0.5554356974,3.2309034465,0.8627129178  
 C,0,0.5151794587,2.8506501478,-0.621612318  
 C,0,-0.7105713871,2.3392113272,-1.1500931434  
 C,0,-1.8017717058,1.8545671761,-0.2849642409  
 O,0,1.5315802475,3.0614109454,-1.324670067  
 O,0,-1.2986139381,0.5102917624,-0.393956698  
 O,0,-2.2189012045,-0.7479856594,0.614420005  
 C,0,-2.9888493337,-1.5840769457,-0.2188377536  
 C,0,-4.0574918617,-0.784168955,-0.9886287205  
 C,0,-2.1013114923,-2.3649753096,-1.2103288916  
 C,0,-3.6822130683,-2.5727895219,0.7485617675  
 H,0,-0.7844200871,2.1942786156,-2.2227607118  
 H,0,-2.7990936572,1.9060790641,-0.7364103457  
 H,0,-2.2673869635,3.3872117146,1.1263834775  
 H,0,-2.4749814032,1.739527889,1.7454569875  
 H,0,-0.4535587394,2.8825543322,2.7556215971  
 H,0,-0.0479560805,1.4159291889,1.8761823727  
 H,0,0.3164101837,4.3040024772,0.9111439803  
 H,0,1.5914916942,3.1352604448,1.2065002073  
 H,0,-2.6943918386,-3.0478822972,-1.8307260026  
 H,0,-1.5776544551,-1.6667644039,-1.8703243217  
 H,0,-1.3560039244,-2.9584616106,-0.6677959596  
 H,0,-4.7159313508,-1.4464973481,-1.5637728681  
 H,0,-4.671665326,-0.2075511399,-0.2889878523  
 H,0,-3.5793812377,-0.0886016749,-1.6843716455  
 H,0,-4.3145406859,-3.2785315298,0.1954065035  
 H,0,-2.9359047259,-3.1429064119,1.3116873595  
 H,0,-4.3072617777,-2.0272093908,1.4620314967  
 H,0,0.2230765291,-0.1228763956,-0.3694814517  
 N,0,1.2043917438,-0.4910396697,-0.4232255109  
 C,0,1.973806336,-0.136033782,-1.6215586093  
 C,0,3.1701871636,-1.0710249585,-1.7551124294  
 H,0,1.2972771389,-0.2265693112,-2.4751168868  
 H,0,2.2674246682,0.9186540382,-1.5591708398  
 C,0,1.684762426,-1.1390647452,0.6157976327  
 N,0,2.9785688206,-1.5143441198,0.6668379083  
 C,0,3.5962498696,-2.138078906,1.8338663627  
 C,0,3.9063210791,-1.15403764,-0.4206971312  
 H,0,4.0620114257,-3.0872081152,1.5468070695  
 H,0,4.3718813432,-1.4792757002,2.2423053772  
 H,0,2.8633961928,-2.3308705297,2.6130693723  
 H,0,4.3877450513,-0.1964933515,-0.1799171636  
 C,0,0.7355242184,-1.4560918284,1.7382087182  
 H,0,2.8407046148,-2.0736376473,-2.0521315875  
 H,0,3.850476152,-0.7020248989,-2.52766326  
 H,0,4.6866295079,-1.9206922282,-0.4517060626  
 H,0,0.7650740752,-2.5243860436,1.9735224742  
 H,0,1.0076372518,-0.9009510248,2.6421618275  
 H,0,-0.2903071248,-1.1969998708,1.4482583879

## Ts 2 from axial attack with DBU model, orientation A (12) – 6-31G\* - PCM Dichloroethane

E(RB+HF-LYP) = -962.843032970

Zero-point correction=

0.451265 (Hartree/Particle)

Thermal correction to Energy=

0.475487

|                                              |             |
|----------------------------------------------|-------------|
| Thermal correction to Enthalpy=              | 0.476431    |
| Thermal correction to Gibbs Free Energy=     | 0.395373    |
| Sum of electronic and zero-point Energies=   | -962.391768 |
| Sum of electronic and thermal Energies=      | -962.367546 |
| Sum of electronic and thermal Enthalpies=    | -962.366602 |
| Sum of electronic and thermal Free Energies= | -962.447660 |

|       | E (Thermal) | CV             | S              |
|-------|-------------|----------------|----------------|
|       | KCal/Mol    | Cal/Mol-Kelvin | Cal/Mol-Kelvin |
| Total | 298.373     | 89.913         | 170.601        |

C,0,-2.287932946,1.5537454503,1.5906728803  
 C,0,-0.8974947579,2.0912444435,1.9465919829  
 C,0,-0.50643307,3.2851330347,1.0648385358  
 C,0,-0.7731215932,3.1075300184,-0.4350697994  
 C,0,-1.7944834285,2.192213975,-0.8318389411  
 C,0,-2.4066979846,1.2271658215,0.1058826463  
 O,0,-0.1539008576,3.8342335051,-1.2459352112  
 O,0,-1.4705831786,0.2745803894,-0.3621627465  
 O,0,-1.6927366278,-1.4018379147,0.5478164015  
 C,0,-2.1648355868,-2.3618536822,-0.3579673103  
 C,0,-3.5500500419,-1.9712981275,-0.9135096779  
 C,0,-1.179866986,-2.5767242595,-1.5266737334  
 C,0,-2.2928062424,-3.6728421648,0.4549449948  
 H,0,-2.0570603292,2.142280787,-1.8848031198  
 H,0,-3.4297805753,0.9240151179,-0.1510580791  
 H,0,-3.0579011607,2.2990125823,1.8397243563  
 H,0,-2.5087829849,0.6443767366,2.1603420942  
 H,0,-0.8613431993,2.378899615,3.0051540558  
 H,0,-0.1639678312,1.2871774089,1.8186168069  
 H,0,-1.0786257124,4.1748411859,1.3735903598  
 H,0,0.5505480288,3.5491895804,1.1922137754  
 H,0,-1.5337396059,-3.3471095637,-2.2242043614  
 H,0,-1.0542449255,-1.6404329195,-2.0797175736  
 H,0,-0.198727535,-2.8871340622,-1.1472341441  
 H,0,-3.972490244,-2.75944173,-1.5502859904  
 H,0,-4.2455164235,-1.7850656379,-0.0868110167  
 H,0,-3.4696650284,-1.0554927165,-1.5077151987  
 H,0,-2.6780294824,-4.4916157751,-0.1668768472  
 H,0,-1.3167360532,-3.9725851359,0.8531703156  
 H,0,-2.9758643016,-3.5277879408,1.2994532739  
 H,0,0.2453714166,-0.0550444125,-0.1400182137  
 N,0,1.2716765013,-0.0556100629,-0.2760975734  
 C,0,1.7836662241,0.758279171,-1.3821809419  
 C,0,3.1131872857,0.1815756683,-1.8541639638  
 H,0,1.0287259886,0.7419736334,-2.1719054144  
 H,0,1.888742714,1.79981205,-1.0561021909  
 C,0,2.0299013564,-0.7727179928,0.5356691549  
 N,0,3.361779523,-0.7777395891,0.4153094701  
 C,0,4.2524776107,-1.4932445719,1.3291241458  
 C,0,4.0391223812,-0.0241420872,-0.6592534024  
 H,0,4.6849874462,-2.3704371011,0.8336066747  
 H,0,5.06492432,-0.8215770505,1.6252776005  
 H,0,3.726197616,-1.810280605,2.2272388978  
 H,0,4.3819770172,0.9362008376,-0.2512631787  
 C,0,1.3347895408,-1.5775440245,1.5976049076  
 H,0,2.9445202543,-0.7766333042,-2.3599242077  
 H,0,3.5878328893,0.8589768756,-2.5706722332  
 H,0,4.9248828556,-0.5979481496,-0.9505999897  
 H,0,1.709936885,-2.6054899258,1.6103009485  
 H,0,1.5146290519,-1.1398647197,2.5869178032  
 H,0,0.2562414817,-1.5942999683,1.3933251

**Ts 2 from axial attack with DBU model, orientation A (12) – 6-31+G\*\* - PCM Dichloroethane**

E(RB+HF-LYP) = -962.926859787

|                                              |                             |
|----------------------------------------------|-----------------------------|
| Zero-point correction=                       | 0.447998 (Hartree/Particle) |
| Thermal correction to Energy=                | 0.471364                    |
| Thermal correction to Enthalpy=              | 0.472309                    |
| Thermal correction to Gibbs Free Energy=     | 0.394614                    |
| Sum of electronic and zero-point Energies=   | -962.478862                 |
| Sum of electronic and thermal Energies=      | -962.455495                 |
| Sum of electronic and thermal Enthalpies=    | -962.454551                 |
| Sum of electronic and thermal Free Energies= | -962.532246                 |

| Total | E (Thermal) |   | CV             |           | S              |
|-------|-------------|---|----------------|-----------|----------------|
|       | KCal/Mol    |   | Cal/Mol-Kelvin |           | Cal/Mol-Kelvin |
|       | 295.786     |   | 88.451         |           | 163.522        |
| 1     | 6           | 0 | -1.914808      | -0.851066 | -1.831361      |
| 2     | 6           | 0 | -1.205791      | -2.102165 | -1.301821      |
| 3     | 6           | 0 | -2.172461      | -3.009988 | -0.530102      |
| 4     | 6           | 0 | -3.096183      | -2.284679 | 0.451876       |
| 5     | 6           | 0 | -3.315865      | -0.902658 | 0.287172       |
| 6     | 6           | 0 | -2.587240      | -0.072403 | -0.701145      |
| 7     | 8           | 0 | -3.697958      | -2.990243 | 1.323002       |
| 8     | 8           | 0 | -1.662145      | 0.420350  | 0.275339       |
| 9     | 8           | 0 | -0.600596      | 1.633380  | -0.424276      |
| 10    | 6           | 0 | -0.848899      | 2.899332  | 0.192083       |
| 11    | 6           | 0 | -2.287545      | 3.361080  | -0.087351      |
| 12    | 6           | 0 | -0.587522      | 2.837489  | 1.706676       |
| 13    | 6           | 0 | 0.150949       | 3.862337  | -0.481079      |
| 14    | 1           | 0 | -4.007582      | -0.406146 | 0.963933       |
| 15    | 1           | 0 | -3.181701      | 0.760111  | -1.101108      |
| 16    | 1           | 0 | -2.689812      | -1.132957 | -2.558851      |
| 17    | 1           | 0 | -1.209793      | -0.189681 | -2.347594      |
| 18    | 1           | 0 | -0.744456      | -2.659106 | -2.127361      |
| 19    | 1           | 0 | -0.394431      | -1.787702 | -0.636070      |
| 20    | 1           | 0 | -2.828513      | -3.544901 | -1.234501      |
| 21    | 1           | 0 | -1.630878      | -3.785189 | 0.025564       |
| 22    | 1           | 0 | -0.772366      | 3.810525  | 2.175604       |
| 23    | 1           | 0 | -1.243473      | 2.096222  | 2.170913       |
| 24    | 1           | 0 | 0.453498       | 2.559718  | 1.907881       |
| 25    | 1           | 0 | -2.455918      | 4.367707  | 0.312124       |
| 26    | 1           | 0 | -2.478303      | 3.380899  | -1.165517      |
| 27    | 1           | 0 | -3.003606      | 2.680856  | 0.381380       |
| 28    | 1           | 0 | 0.029644       | 4.874989  | -0.078831      |
| 29    | 1           | 0 | 1.182922       | 3.545052  | -0.297493      |
| 30    | 1           | 0 | -0.017034      | 3.897345  | -1.562302      |
| 31    | 1           | 0 | 0.691683       | 0.662319  | 0.067320       |
| 32    | 7           | 0 | 1.497985       | 0.050138  | 0.338733       |
| 33    | 6           | 0 | 1.475155       | -0.582713 | 1.659175       |
| 34    | 6           | 0 | 2.905706       | -0.782539 | 2.147817       |
| 35    | 1           | 0 | 0.902869       | 0.063017  | 2.328202       |
| 36    | 1           | 0 | 0.943615       | -1.540081 | 1.594505       |
| 37    | 6           | 0 | 2.488356       | -0.099340 | -0.524543      |
| 38    | 7           | 0 | 3.558963       | -0.849448 | -0.242887      |
| 39    | 6           | 0 | 4.658397       | -1.078931 | -1.183236      |
| 40    | 6           | 0 | 3.717225       | -1.501478 | 1.075203       |
| 41    | 1           | 0 | 5.545740       | -0.514264 | -0.875411      |
| 42    | 1           | 0 | 4.902598       | -2.145555 | -1.183160      |
| 43    | 1           | 0 | 4.384306       | -0.790912 | -2.195569      |
| 44    | 1           | 0 | 3.413401       | -2.552703 | 0.982982       |
| 45    | 6           | 0 | 2.362661       | 0.603024  | -1.848817      |
| 46    | 1           | 0 | 3.362028       | 0.189292  | 2.370679       |
| 47    | 1           | 0 | 2.913956       | -1.374768 | 3.067649       |

|    |   |   |          |           |           |
|----|---|---|----------|-----------|-----------|
| 48 | 1 | 0 | 4.783746 | -1.482954 | 1.320668  |
| 49 | 1 | 0 | 3.216745 | 1.264180  | -2.023220 |
| 50 | 1 | 0 | 2.319915 | -0.121902 | -2.668121 |
| 51 | 1 | 0 | 1.445346 | 1.192051  | -1.861023 |

### Ts 1 from axial attack with DBU model, orientation B – 6-31G\* - Gas Phase

E(RB+HF-LYP) = -962.823755913

|                                              |                             |
|----------------------------------------------|-----------------------------|
| Zero-point correction=                       | 0.452744 (Hartree/Particle) |
| Thermal correction to Energy=                | 0.476284                    |
| Thermal correction to Enthalpy=              | 0.477228                    |
| Thermal correction to Gibbs Free Energy=     | 0.399923                    |
| Sum of electronic and zero-point Energies=   | -962.371012                 |
| Sum of electronic and thermal Energies=      | -962.347472                 |
| Sum of electronic and thermal Enthalpies=    | -962.346528                 |
| Sum of electronic and thermal Free Energies= | -962.423833                 |

|       | E (Thermal) | CV             | S              |
|-------|-------------|----------------|----------------|
|       | KCal/Mol    | Cal/Mol-Kelvin | Cal/Mol-Kelvin |
| Total | 298.872     | 89.230         | 162.701        |

C,0,-1.2350469784,2.4225336598,0.9535541259  
 C,0,0.0343260457,2.1033952631,1.7492164827  
 C,0,1.2991704223,2.5681560694,1.0149309189  
 C,0,1.3469636233,2.1557922271,-0.4661334813  
 C,0,0.1092105197,2.0502135863,-1.1482259083  
 C,0,-1.134602872,1.9574935224,-0.4816774422  
 O,0,2.4756453271,1.9905262608,-0.9981388014  
 O,0,-1.4259160182,0.1839751023,-0.4019463337  
 O,0,-2.4543674129,-0.2967103373,0.5345546901  
 C,0,-3.5744664325,-0.8530618264,-0.1837910918  
 C,0,-4.2230684805,0.2008762198,-1.0890036361  
 C,0,-3.1248554164,-2.075261327,-0.9958842346  
 C,0,-4.5254055897,-1.2644108466,0.948200782  
 H,0,0.1413978847,1.9129269865,-2.2262480693  
 H,0,-2.023967518,2.173864425,-1.0715597498  
 H,0,-1.3999940165,3.5110252818,0.9345612144  
 H,0,-2.1118871927,1.9710866751,1.4287246137  
 H,0,-0.0199554757,2.5537066484,2.7494667528  
 H,0,0.0745816543,1.0172270864,1.8987521865  
 H,0,1.3634736285,3.6667371555,1.0462213416  
 H,0,2.2107495573,2.1986675594,1.5016788636  
 H,0,-3.9735674871,-2.5412174629,-1.5100670352  
 H,0,-2.3870628674,-1.775535983,-1.7452199874  
 H,0,-2.6679835907,-2.8237769602,-0.3380362468  
 H,0,-5.1160837199,-0.2043919176,-1.5794393255  
 H,0,-4.5202235426,1.0772987642,-0.5026776487  
 H,0,-3.519738208,0.5214278116,-1.8619472687  
 H,0,-5.430521491,-1.7277917638,0.5401003325  
 H,0,-4.0398073883,-1.9838764191,1.6163010724  
 H,0,-4.8193672767,-0.3908564918,1.5394582178  
 H,0,-0.1643856493,-0.8254250259,-0.2174972522  
 N,0,0.7237334473,-1.3472910854,0.0533098507  
 C,0,0.8218397645,-1.7721837944,1.4477603755  
 C,0,2.1363057511,-1.2824899987,2.0498377465  
 H,0,-0.0487864969,-1.3680175481,1.9690410997  
 H,0,0.7584526082,-2.8677052044,1.4959668364  
 C,0,1.7841034895,-1.1544911675,-0.7132422238  
 N,0,3.0307164782,-1.3693270107,-0.2699807244  
 C,0,4.1888401923,-0.9616583581,-1.0760456003  
 C,0,3.2978526654,-1.6895101957,1.1459964178  
 H,0,4.285513571,0.1299938066,-1.0550791255

H,0,5.081658821,-1.432580136,-0.6597088111  
 H,0,4.081597759,-1.2957040665,-2.1089514309  
 H,0,3.5047549932,-2.7649500428,1.2303490602  
 C,0,1.5618374654,-0.7173229488,-2.1300193533  
 H,0,2.1098181173,-0.1924326648,2.1439863677  
 H,0,2.2868059353,-1.7037640713,3.0488816607  
 H,0,4.206166308,-1.1551324043,1.4386346539  
 H,0,2.028561694,0.2652912465,-2.2753174694  
 H,0,1.9944762056,-1.4493166316,-2.8213576141  
 H,0,0.4932535204,-0.631200695,-2.3209208291

### Ts 1 from axial attack with DBU model, orientation B – 6-31+G\*\* - Gas Phase

E(RB+HF-LYP) = -962.900565519

|                                              |                             |
|----------------------------------------------|-----------------------------|
| Zero-point correction=                       | 0.449017 (Hartree/Particle) |
| Thermal correction to Energy=                | 0.472991                    |
| Thermal correction to Enthalpy=              | 0.473936                    |
| Thermal correction to Gibbs Free Energy=     | 0.395050                    |
| Sum of electronic and zero-point Energies=   | -962.451548                 |
| Sum of electronic and thermal Energies=      | -962.427574                 |
| Sum of electronic and thermal Enthalpies=    | -962.426630                 |
| Sum of electronic and thermal Free Energies= | -962.505515                 |

|       | E (Thermal)<br>KCal/Mol | CV<br>Cal/Mol-Kelvin | S<br>Cal/Mol-Kelvin |
|-------|-------------------------|----------------------|---------------------|
| Total | 296.807                 | 90.216               | 166.028             |

C,0,-1.2821683242,2.4586358971,1.0046404393  
 C,0,-0.0255535369,2.1515352691,1.8262298902  
 C,0,1.2533372487,2.6002155145,1.1049068617  
 C,0,1.3237373468,2.1719955113,-0.3689097871  
 C,0,0.0998825183,2.0645583954,-1.0742168644  
 C,0,-1.1586700919,1.9765505126,-0.423333971  
 O,0,2.4632811664,1.9896282859,-0.8807577027  
 O,0,-1.4186798123,0.2182236543,-0.3373623056  
 O,0,-2.5063657303,-0.2845626934,0.5236506515  
 C,0,-3.5821988637,-0.8412703966,-0.2672679799  
 C,0,-4.2030866121,0.2272576726,-1.1760925359  
 C,0,-3.0777182552,-2.0365655703,-1.0871729437  
 C,0,-4.5827883372,-1.2955151578,0.8044568939  
 H,0,0.1485483996,1.9159863111,-2.1494013046  
 H,0,-2.0357505632,2.1907499411,-1.0315991666  
 H,0,-1.4479625491,3.5458927729,0.9665294601  
 H,0,-2.1672064926,2.0132434242,1.4702481778  
 H,0,-0.0945117221,2.6236081242,2.8148497613  
 H,0,0.0114294528,1.0693487918,2.0004699912  
 H,0,1.3235270781,3.6981538535,1.1165694517  
 H,0,2.1537499064,2.2345155477,1.6123900945  
 H,0,-3.9010211156,-2.502847771,-1.6397524461  
 H,0,-2.3212507726,-1.7098752484,-1.8054038998  
 H,0,-2.6334870216,-2.7912475278,-0.4291620269  
 H,0,-5.0691313044,-0.1793268621,-1.7104400442  
 H,0,-4.5354641935,1.0865766562,-0.5847972889  
 H,0,-3.4751838731,0.5711984112,-1.9151313076  
 H,0,-5.4593368377,-1.7531858754,0.3336970373  
 H,0,-4.1250725583,-2.0316849689,1.4729418002  
 H,0,-4.9170902384,-0.4444213141,1.405755524  
 H,0,-0.1399398818,-0.7744922029,-0.1368332921  
 N,0,0.7510559734,-1.2993871062,0.1118918967  
 C,0,0.9096782107,-1.7024472831,1.5079533966  
 C,0,2.2599823538,-1.2210075828,2.0327129835  
 H,0,0.0757334359,-1.2750806512,2.0681707729

H,0,0.8324275942,-2.7956022616,1.5798267436  
 C,0,1.7795557853,-1.1812990971,-0.7120069417  
 N,0,3.0339359986,-1.4500860108,-0.3205791457  
 C,0,4.177182884,-1.2084878605,-1.2080970777  
 C,0,3.3698225619,-1.6922239895,1.0974978187  
 H,0,4.4338016067,-0.1429715211,-1.2138577482  
 H,0,5.0244771596,-1.7928209071,-0.8433171787  
 H,0,3.9583032781,-1.5310596753,-2.2254095104  
 H,0,3.5733488805,-2.7630670467,1.2305463598  
 C,0,1.5136570346,-0.7638713741,-2.1265876072  
 H,0,2.2608288624,-0.1281911352,2.0829419519  
 H,0,2.4443524541,-1.6056942988,3.040248207  
 H,0,4.29547561,-1.1493476981,1.3101989031  
 H,0,2.0255132823,0.1852784632,-2.3198833167  
 H,0,1.8676652097,-1.5317446761,-2.8220356339  
 H,0,0.4444865814,-0.6202555765,-2.2700699268

### Ts 1 from axial attack with DBU model, orientation B – 6-31G\* - PCM Dichloroethane

E(RB+HF-LYP) = -962.841832029

|                                              |                             |
|----------------------------------------------|-----------------------------|
| Zero-point correction=                       | 0.450623 (Hartree/Particle) |
| Thermal correction to Energy=                | 0.474920                    |
| Thermal correction to Enthalpy=              | 0.475864                    |
| Thermal correction to Gibbs Free Energy=     | 0.394191                    |
| Sum of electronic and zero-point Energies=   | -962.391209                 |
| Sum of electronic and thermal Energies=      | -962.366912                 |
| Sum of electronic and thermal Enthalpies=    | -962.365968                 |
| Sum of electronic and thermal Free Energies= | -962.447641                 |

| Total | E (Thermal) |   | CV             |           | S              |
|-------|-------------|---|----------------|-----------|----------------|
|       | KCal/Mol    |   | Cal/Mol-Kelvin |           | Cal/Mol-Kelvin |
|       | 298.017     |   | 89.877         |           | 171.895        |
| 1     | 6           | 0 | -1.651611      | 2.180524  | 1.296383       |
| 2     | 6           | 0 | -0.233811      | 2.169250  | 1.876477       |
| 3     | 6           | 0 | 0.674278       | 3.175063  | 1.158877       |
| 4     | 6           | 0 | 0.611155       | 3.084845  | -0.372729      |
| 5     | 6           | 0 | -0.596124      | 2.600279  | -0.952715      |
| 6     | 6           | 0 | -1.635904      | 2.041550  | -0.204556      |
| 7     | 8           | 0 | 1.589685       | 3.503119  | -1.036850      |
| 8     | 8           | 0 | -1.379345      | 0.125426  | -0.393911      |
| 9     | 8           | 0 | -2.190952      | -0.734726 | 0.468925       |
| 10    | 6           | 0 | -3.140666      | -1.485049 | -0.316895      |
| 11    | 6           | 0 | -4.080506      | -0.541944 | -1.078166      |
| 12    | 6           | 0 | -2.401061      | -2.421134 | -1.282284      |
| 13    | 6           | 0 | -3.907942      | -2.283819 | 0.744116       |
| 14    | 1           | 0 | -0.664044      | 2.624025  | -2.039910      |
| 15    | 1           | 0 | -2.614819      | 1.967407  | -0.670849      |
| 16    | 1           | 0 | -2.150450      | 3.132000  | 1.545093       |
| 17    | 1           | 0 | -2.258440      | 1.377861  | 1.727473       |
| 18    | 1           | 0 | -0.258306      | 2.373350  | 2.954964       |
| 19    | 1           | 0 | 0.179347       | 1.160905  | 1.752092       |
| 20    | 1           | 0 | 0.385220       | 4.202353  | 1.434054       |
| 21    | 1           | 0 | 1.722037       | 3.060924  | 1.462600       |
| 22    | 1           | 0 | -3.107119      | -3.013247 | -1.876241      |
| 23    | 1           | 0 | -1.776670      | -1.834908 | -1.961772      |
| 24    | 1           | 0 | -1.755616      | -3.111374 | -0.726402      |
| 25    | 1           | 0 | -4.842388      | -1.108999 | -1.625993      |
| 26    | 1           | 0 | -4.588554      | 0.133958  | -0.380975      |
| 27    | 1           | 0 | -3.512337      | 0.058677  | -1.793324      |
| 28    | 1           | 0 | -4.661205      | -2.923776 | 0.271464       |
| 29    | 1           | 0 | -3.223770      | -2.919986 | 1.316307       |

|    |   |   |           |           |           |
|----|---|---|-----------|-----------|-----------|
| 30 | 1 | 0 | -4.415786 | -1.608791 | 1.441653  |
| 31 | 1 | 0 | 0.016149  | -0.534442 | -0.117051 |
| 32 | 7 | 0 | 0.940221  | -1.033020 | 0.115980  |
| 33 | 6 | 0 | 0.989689  | -1.833480 | 1.339517  |
| 34 | 6 | 0 | 2.394652  | -1.786199 | 1.930525  |
| 35 | 1 | 0 | 0.240768  | -1.430942 | 2.025577  |
| 36 | 1 | 0 | 0.699685  | -2.866626 | 1.106146  |
| 37 | 6 | 0 | 1.987304  | -0.806772 | -0.652112 |
| 38 | 7 | 0 | 3.199600  | -1.301560 | -0.359982 |
| 39 | 6 | 0 | 4.378848  | -1.121080 | -1.204405 |
| 40 | 6 | 0 | 3.414336  | -2.123901 | 0.846167  |
| 41 | 1 | 0 | 5.170889  | -0.630265 | -0.628078 |
| 42 | 1 | 0 | 4.745789  | -2.097366 | -1.542751 |
| 43 | 1 | 0 | 4.153742  | -0.509776 | -2.075374 |
| 44 | 1 | 0 | 3.358371  | -3.184927 | 0.566635  |
| 45 | 6 | 0 | 1.765480  | 0.038142  | -1.877704 |
| 46 | 1 | 0 | 2.598141  | -0.785186 | 2.328961  |
| 47 | 1 | 0 | 2.489262  | -2.499569 | 2.755236  |
| 48 | 1 | 0 | 4.432007  | -1.927572 | 1.198758  |
| 49 | 1 | 0 | 2.269997  | 1.006591  | -1.787395 |
| 50 | 1 | 0 | 2.127081  | -0.470928 | -2.776092 |
| 51 | 1 | 0 | 0.698461  | 0.234492  | -1.985082 |

### Ts 1 from axial attack with DBU model, orientation B – 6-31+G\*\* - PCM Dichloroethane

E(RB+HF-LYP) = -962.924560565

|                                              |                             |
|----------------------------------------------|-----------------------------|
| Zero-point correction=                       | 0.447056 (Hartree/Particle) |
| Thermal correction to Energy=                | 0.470654                    |
| Thermal correction to Enthalpy=              | 0.471598                    |
| Thermal correction to Gibbs Free Energy=     | 0.392933                    |
| Sum of electronic and zero-point Energies=   | -962.477505                 |
| Sum of electronic and thermal Energies=      | -962.453907                 |
| Sum of electronic and thermal Enthalpies=    | -962.452962                 |
| Sum of electronic and thermal Free Energies= | -962.531628                 |

|       | E (Thermal) |         | CV             |           | S              |
|-------|-------------|---------|----------------|-----------|----------------|
|       | KCal/Mol    |         | Cal/Mol-Kelvin |           | Cal/Mol-Kelvin |
| Total |             | 295.340 |                | 88.625    | 165.566        |
| 1     | 6           | 0       | -2.027501      | 1.705476  | 1.484703       |
| 2     | 6           | 0       | -0.648821      | 2.298507  | 1.793033       |
| 3     | 6           | 0       | -0.381843      | 3.551824  | 0.950066       |
| 4     | 6           | 0       | -0.704786      | 3.383481  | -0.536172      |
| 5     | 6           | 0       | -1.636073      | 2.377138  | -0.912325      |
| 6     | 6           | 0       | -2.221282      | 1.497745  | 0.005138       |
| 7     | 8           | 0       | -0.186512      | 4.195142  | -1.352873      |
| 8     | 8           | 0       | -1.286661      | -0.222501 | -0.252303      |
| 9     | 8           | 0       | -1.838954      | -1.312785 | 0.549192       |
| 10    | 6           | 0       | -2.472997      | -2.307066 | -0.293104      |
| 11    | 6           | 0       | -3.638380      | -1.692261 | -1.078532      |
| 12    | 6           | 0       | -1.444407      | -2.936936 | -1.242466      |
| 13    | 6           | 0       | -2.981958      | -3.338384 | 0.722039       |
| 14    | 1           | 0       | -1.896444      | 2.309003  | -1.967740      |
| 15    | 1           | 0       | -3.143863      | 1.002445  | -0.279580      |
| 16    | 1           | 0       | -2.816169      | 2.392191  | 1.834210       |
| 17    | 1           | 0       | -2.179619      | 0.756376  | 2.007902       |
| 18    | 1           | 0       | -0.561963      | 2.532992  | 2.861293       |
| 19    | 1           | 0       | 0.113645       | 1.543144  | 1.568217       |
| 20    | 1           | 0       | -0.999176      | 4.388445  | 1.313371       |
| 21    | 1           | 0       | 0.660575       | 3.880194  | 1.036752       |
| 22    | 1           | 0       | -1.907961      | -3.729472 | -1.840437      |
| 23    | 1           | 0       | -1.042065      | -2.179914 | -1.920386      |

|    |   |   |           |           |           |
|----|---|---|-----------|-----------|-----------|
| 24 | 1 | 0 | -0.615907 | -3.372912 | -0.673972 |
| 25 | 1 | 0 | -4.141177 | -2.458413 | -1.679431 |
| 26 | 1 | 0 | -4.374138 | -1.253788 | -0.395734 |
| 27 | 1 | 0 | -3.272842 | -0.910961 | -1.749824 |
| 28 | 1 | 0 | -3.485508 | -4.161162 | 0.203609  |
| 29 | 1 | 0 | -2.150875 | -3.752612 | 1.302116  |
| 30 | 1 | 0 | -3.694455 | -2.879375 | 1.415155  |
| 31 | 1 | 0 | 0.215773  | -0.470688 | 0.049059  |
| 32 | 7 | 0 | 1.245799  | -0.709125 | 0.264896  |
| 33 | 6 | 0 | 1.562527  | -1.328209 | 1.552338  |
| 34 | 6 | 0 | 2.971159  | -0.929845 | 1.980906  |
| 35 | 1 | 0 | 0.809713  | -1.000061 | 2.273008  |
| 36 | 1 | 0 | 1.477433  | -2.419180 | 1.461515  |
| 37 | 6 | 0 | 2.163305  | -0.419532 | -0.637388 |
| 38 | 7 | 0 | 3.465684  | -0.668420 | -0.432594 |
| 39 | 6 | 0 | 4.508150  | -0.415001 | -1.428295 |
| 40 | 6 | 0 | 3.949707  | -1.223152 | 0.848076  |
| 41 | 1 | 0 | 5.122891  | 0.441234  | -1.127561 |
| 42 | 1 | 0 | 5.149600  | -1.299141 | -1.500524 |
| 43 | 1 | 0 | 4.082956  | -0.220569 | -2.410156 |
| 44 | 1 | 0 | 4.104063  | -2.303992 | 0.727222  |
| 45 | 6 | 0 | 1.694587  | 0.204004  | -1.923754 |
| 46 | 1 | 0 | 2.997497  | 0.138114  | 2.227396  |
| 47 | 1 | 0 | 3.271016  | -1.485583 | 2.874545  |
| 48 | 1 | 0 | 4.924388  | -0.768599 | 1.052819  |
| 49 | 1 | 0 | 2.205837  | 1.153222  | -2.108458 |
| 50 | 1 | 0 | 1.893521  | -0.461968 | -2.769938 |
| 51 | 1 | 0 | 0.621567  | 0.388260  | -1.868265 |

### Intermediate from axial attack with DBU model, orientation B – 6-31G\* Gas Phase

E(RB+HF-LYP) = -962.826959810

|                                              |                             |
|----------------------------------------------|-----------------------------|
| Zero-point correction=                       | 0.454082 (Hartree/Particle) |
| Thermal correction to Energy=                | 0.477971                    |
| Thermal correction to Enthalpy=              | 0.478915                    |
| Thermal correction to Gibbs Free Energy=     | 0.400278                    |
| Sum of electronic and zero-point Energies=   | -962.372878                 |
| Sum of electronic and thermal Energies=      | -962.348989                 |
| Sum of electronic and thermal Enthalpies=    | -962.348044                 |
| Sum of electronic and thermal Free Energies= | -962.426682                 |

|       | E (Thermal) | CV             | S              |
|-------|-------------|----------------|----------------|
|       | KCal/Mol    | Cal/Mol-Kelvin | Cal/Mol-Kelvin |
| Total | 299.932     | 90.708         | 165.507        |

C,0,-1.2067163348,2.431667423,1.1759262679  
 C,0,0.1051717461,2.1348452451,1.9078141346  
 C,0,1.3194110069,2.4973336256,1.0432149439  
 C,0,1.2394586156,2.0116624067,-0.4153035152  
 C,0,-0.0252489134,1.7852805507,-0.9632974225  
 C,0,-1.268460059,1.7317257703,-0.1796618544  
 O,0,2.3452101904,1.9012684967,-1.0404310551  
 O,0,-1.4831496916,0.2494140858,0.0139533037  
 O,0,-2.7738958304,-0.0278955009,0.7281728434  
 C,0,-3.656581105,-0.7891131164,-0.1155230659  
 C,0,-3.9913425533,-0.0339738898,-1.4075630559  
 C,0,-3.0511061386,-2.1671593573,-0.4220168528  
 C,0,-4.901703815,-0.9345382964,0.7721123587  
 H,0,-0.0944969375,1.5819980488,-2.0296873881  
 H,0,-2.1520716112,2.0668195181,-0.7364209399  
 H,0,-1.2919897453,3.5122817285,0.9931213409  
 H,0,-2.0700657648,2.1350353364,1.7815988568

H,0,0.1375478415,2.6725726007,2.8653225607  
 H,0,0.1282128116,1.0647424501,2.1550176397  
 H,0,1.4361025919,3.5913934839,1.0095644743  
 H,0,2.2534218561,2.117337644,1.4789320108  
 H,0,-3.7672560933,-2.7970153004,-0.9625275333  
 H,0,-2.1546256655,-2.069849649,-1.0419725692  
 H,0,-2.7780309667,-2.6767148263,0.50880688  
 H,0,-4.7060709901,-0.6032641266,-2.0135584295  
 H,0,-4.4341951992,0.9409599187,-1.1785268304  
 H,0,-3.0879118387,0.1275186719,-2.002210467  
 H,0,-5.6740047055,-1.5127928129,0.2527102528  
 H,0,-4.6514323522,-1.4489269151,1.7057550999  
 H,0,-5.3115699641,0.0495516431,1.020434016  
 H,0,-0.0192906747,-0.9449555272,-0.5083194642  
 N,0,0.8422030746,-1.4244315088,-0.2173850928  
 C,0,0.8787909071,-1.7923298652,1.2000944001  
 C,0,2.1715984222,-1.2891401506,1.8329599357  
 H,0,-0.0039835847,-1.345666465,1.6621216356  
 H,0,0.7980872552,-2.8833248004,1.2893693614  
 C,0,1.9244192631,-1.1514639598,-0.9404394659  
 N,0,3.1548638815,-1.316549686,-0.4463474227  
 C,0,4.311117073,-0.7536180498,-1.1617608352  
 C,0,3.359712071,-1.6965528327,0.9660467986  
 H,0,4.251635778,0.3407346424,-1.1236574648  
 H,0,5.2219932531,-1.1118370367,-0.6796490079  
 H,0,4.3267785761,-1.0849197928,-2.2013812913  
 H,0,3.5340283478,-2.779609651,1.0179706449  
 C,0,1.7346210618,-0.6607636165,-2.3398749572  
 H,0,2.1389945663,-0.1988504911,1.9154472764  
 H,0,2.2922399906,-1.7036423242,2.8387365751  
 H,0,4.2681620751,-1.1979502715,1.3119431995  
 H,0,2.0185734999,0.4082170465,-2.3394219942  
 H,0,2.3571607716,-1.2276533942,-3.0384162392  
 H,0,0.6904233531,-0.7607889584,-2.6349022198

### Intermediate from axial attack with DBU model, orientation B – 6-31+G\*\* Gas Phase

E(RB+HF-LYP) = -962.904888505

|                                              |                             |
|----------------------------------------------|-----------------------------|
| Zero-point correction=                       | 0.450385 (Hartree/Particle) |
| Thermal correction to Energy=                | 0.474665                    |
| Thermal correction to Enthalpy=              | 0.475609                    |
| Thermal correction to Gibbs Free Energy=     | 0.395391                    |
| Sum of electronic and zero-point Energies=   | -962.454503                 |
| Sum of electronic and thermal Energies=      | -962.430224                 |
| Sum of electronic and thermal Enthalpies=    | -962.429280                 |
| Sum of electronic and thermal Free Energies= | -962.509498                 |

|       | E (Thermal) | CV             | S              |
|-------|-------------|----------------|----------------|
|       | KCal/Mol    | Cal/Mol-Kelvin | Cal/Mol-Kelvin |
| Total | 297.857     | 91.476         | 168.833        |

C,0,-1.465333962,2.5287081345,1.2127140984  
 C,0,-0.2531954839,2.2338754834,2.1013200111  
 C,0,1.0561269527,2.4671232819,1.3366413103  
 C,0,1.0935265512,1.8581256007,-0.0717309016  
 C,0,-0.1209466131,1.5568596676,-0.70298902  
 C,0,-1.4530625209,1.6665130378,-0.0517887737  
 O,0,2.2422038391,1.6628471966,-0.5913398712  
 O,0,-1.7961013778,0.2625087707,0.2784477647  
 O,0,-3.2014723363,0.2123964737,0.7658194772  
 C,0,-3.9408896104,-0.7556238036,-0.0088785677  
 C,0,-3.9992612691,-0.3495150231,-1.4875338072

C,0,-3.327892952,-2.1532973433,0.1616505359  
 C,0,-5.3338373954,-0.6905426399,0.6331133831  
 H,0,-0.1031446541,1.3383099832,-1.7698754925  
 H,0,-2.2328765263,2.0060700659,-0.7454679896  
 H,0,-1.448739574,3.5822856211,0.9000091604  
 H,0,-2.4020662317,2.3635704138,1.7549594663  
 H,0,-0.2831605,2.8548522176,3.0059630155  
 H,0,-0.3102471075,1.189601868,2.4357788055  
 H,0,1.2273527412,3.5468026275,1.2102133589  
 H,0,1.9230115026,2.0944439299,1.8960891513  
 H,0,-3.9358833823,-2.9059380915,-0.3528290424  
 H,0,-2.3180921272,-2.1823916389,-0.2555695752  
 H,0,-3.2741725078,-2.4159385705,1.223166194  
 H,0,-4.6027666053,-1.0653332523,-2.0568169527  
 H,0,-4.4483963205,0.6428142619,-1.5959803399  
 H,0,-2.9949340381,-0.3263022565,-1.9182661473  
 H,0,-6.0083840877,-1.3970844335,0.1379578186  
 H,0,-5.2809721538,-0.9465887158,1.6956997385  
 H,0,-5.754899792,0.3151912849,0.5398943507  
 H,0,0.4794206757,-0.4617039758,-0.820288744  
 N,0,1.2117664249,-1.1679685427,-0.6072036041  
 C,0,1.1486683168,-1.6913952308,0.7606199465  
 C,0,2.4018689988,-1.2802618628,1.52913807  
 H,0,0.2384077384,-1.289991843,1.2109642812  
 H,0,1.0585668346,-2.784468965,0.7179904972  
 C,0,2.3723500861,-0.9608262156,-1.2275183685  
 N,0,3.5302687182,-1.3583835555,-0.6836987715  
 C,0,4.8090566902,-1.1822360847,-1.3707047436  
 C,0,3.6362613099,-1.7142937366,0.7469036799  
 H,0,5.227762998,-0.1904701404,-1.1618175486  
 H,0,5.5026637265,-1.9469348184,-1.0114864728  
 H,0,4.6979733533,-1.3053157235,-2.4469201955  
 H,0,3.7984656464,-2.7978574755,0.823858118  
 C,0,2.3396673299,-0.4207444288,-2.6264740878  
 H,0,2.4103826857,-0.1942334083,1.651893565  
 H,0,2.4179426757,-1.741581586,2.5212294349  
 H,0,4.5284829088,-1.2153192246,1.1391247253  
 H,0,3.0104316557,0.4328693729,-2.7225094955  
 H,0,2.6161812896,-1.2077633771,-3.3393197367  
 H,0,1.3317636021,-0.0839620119,-2.8616428741

### Intermediate from axial attack with DBU model, orientation B – 6-31G\* – PCM Dichloroethane

E(RB+HF-LYP) = -962.848186241

|                                              |                             |
|----------------------------------------------|-----------------------------|
| Zero-point correction=                       | 0.452581 (Hartree/Particle) |
| Thermal correction to Energy=                | 0.476230                    |
| Thermal correction to Enthalpy=              | 0.477174                    |
| Thermal correction to Gibbs Free Energy=     | 0.393389                    |
| Sum of electronic and zero-point Energies=   | -962.395605                 |
| Sum of electronic and thermal Energies=      | -962.371956                 |
| Sum of electronic and thermal Enthalpies=    | -962.371012                 |
| Sum of electronic and thermal Free Energies= | -962.454798                 |

|       | E (Thermal) | CV             | S              |
|-------|-------------|----------------|----------------|
|       | KCal/Mol    | Cal/Mol-Kelvin | Cal/Mol-Kelvin |
| Total | 298.839     | 88.961         | 176.342        |

C,0,-1.5330261807,2.6225550746,0.568744156  
 C,0,-0.1526766138,2.666603433,1.2291589434  
 C,0,0.9272858089,3.0855628333,0.2246995255  
 C,0,0.8484698801,2.3742417054,-1.1378544077  
 C,0,-0.3626091488,1.7988954132,-1.5159586656

C,0,-1.5460025521,1.6873584873,-0.6408969193  
 O,0,1.9051708086,2.4008003745,-1.856207202  
 O,0,-1.5127491339,0.2607458612,-0.1926985085  
 O,0,-2.7243057822,-0.073752388,0.6148172858  
 C,0,-3.4614606428,-1.1315324358,-0.0376772711  
 C,0,-3.9237298657,-0.708312372,-1.436706199  
 C,0,-2.6150195335,-2.4105463017,-0.0971715466  
 C,0,-4.6604713847,-1.3170457198,0.902740239  
 H,0,-0.4251267028,1.3494605377,-2.5069640259  
 H,0,-2.4975085601,1.7857413989,-1.1802364355  
 H,0,-1.8095464768,3.6282386801,0.2195358085  
 H,0,-2.3031209993,2.3058694768,1.2812403497  
 H,0,-0.1625364807,3.343687272,2.0941513154  
 H,0,0.0805807439,1.6669782477,1.6193946221  
 H,0,0.8617936371,4.1696125131,0.0372542239  
 H,0,1.9329812853,2.9140580606,0.6306775704  
 H,0,-3.2004980279,-3.2450638394,-0.499757965  
 H,0,-1.7413022002,-2.2659446518,-0.7389872612  
 H,0,-2.2700753309,-2.6844207286,0.9063305309  
 H,0,-4.5312873634,-1.4976429319,-1.8943906911  
 H,0,-4.5281727728,0.2035491964,-1.3835774341  
 H,0,-3.0625109023,-0.5195169586,-2.0837005758  
 H,0,-5.314856888,-2.1111065212,0.5268881528  
 H,0,-4.3253642843,-1.5923147376,1.908493343  
 H,0,-5.2426950373,-0.3920848894,0.9727669559  
 H,0,0.1775945384,-0.5477245296,-0.0237979222  
 N,0,1.0191972965,-0.9981517209,0.3611709348  
 C,0,1.0135786091,-1.2986171156,1.7928498166  
 C,0,2.3952658723,-1.002985904,2.3651279825  
 H,0,0.2353715502,-0.6863450958,2.2542616198  
 H,0,0.7464134404,-2.3528075083,1.9443473627  
 C,0,2.0917726467,-1.1114259029,-0.4119399513  
 N,0,3.2591810643,-1.5233001179,0.0913126797  
 C,0,4.4408509437,-1.7439121497,-0.7525773867  
 C,0,3.4513692986,-1.7354361623,1.54432933  
 H,0,4.8777816177,-0.7952827937,-1.08307371  
 H,0,5.1805885306,-2.2843894358,-0.1599264428  
 H,0,4.1971986791,-2.3547911895,-1.6241432481  
 H,0,3.429953763,-2.8148014023,1.7435476613  
 C,0,1.9537714649,-0.7382335745,-1.85513663  
 H,0,2.5826560693,0.0766905137,2.3389554326  
 H,0,2.4582955634,-1.3295357674,3.4077880795  
 H,0,4.4506766736,-1.3678605227,1.7975559353  
 H,0,2.1880369212,0.3353705784,-1.9866931703  
 H,0,2.5999168651,-1.338039816,-2.4972139783  
 H,0,0.91697487,-0.8747869162,-2.1657901012

### Intermediate from axial attack with DBU model, orientation B – 6-31+G\*\* - PCM Dichloroethane

E(RB+HF-LYP) = -962.931089719

|                                              |                             |
|----------------------------------------------|-----------------------------|
| Zero-point correction=                       | 0.449743 (Hartree/Particle) |
| Thermal correction to Energy=                | 0.473420                    |
| Thermal correction to Enthalpy=              | 0.474365                    |
| Thermal correction to Gibbs Free Energy=     | 0.394307                    |
| Sum of electronic and zero-point Energies=   | -962.481347                 |
| Sum of electronic and thermal Energies=      | -962.457669                 |
| Sum of electronic and thermal Enthalpies=    | -962.456725                 |
| Sum of electronic and thermal Free Energies= | -962.536783                 |

|       | E (Thermal) | CV             | S              |
|-------|-------------|----------------|----------------|
|       | KCal/Mol    | Cal/Mol-Kelvin | Cal/Mol-Kelvin |
| Total | 297.076     | 89.538         | 168.496        |

C,0,-1.741169548,2.2290685591,1.250781529  
 C,0,-0.3280909787,2.2753478861,1.8392151158  
 C,0,0.6278562758,3.0631328082,0.9334341713  
 C,0,0.5140927528,2.7319056343,-0.5603410619  
 C,0,-0.6487852163,2.1329626651,-1.0295749561  
 C,0,-1.7441823064,1.6449526065,-0.161744119  
 O,0,1.5094179811,3.0769204893,-1.3049766911  
 O,0,-1.5209488781,0.1614895177,-0.1175954231  
 O,0,-2.6327238517,-0.5200652983,0.605185073  
 C,0,-3.3076604954,-1.4447690586,-0.2878162667  
 C,0,-3.9182111454,-0.7103435863,-1.4870967509  
 C,0,-2.3405522813,-2.5460223661,-0.7419452467  
 C,0,-4.4047862342,-2.022515475,0.6166346912  
 H,0,-0.7302887866,1.9397949571,-2.0988712748  
 H,0,-2.7358134957,1.7597685249,-0.6158672303  
 H,0,-2.1525842956,3.246795331,1.1902201181  
 H,0,-2.4151961785,1.6463577792,1.8880139124  
 H,0,-0.3484546573,2.711521664,2.8464562356  
 H,0,0.0399507872,1.2478820573,1.9533446816  
 H,0,0.4393057811,4.1429282234,1.0403873333  
 H,0,1.6717842472,2.9091306664,1.2343252533  
 H,0,-2.8694907253,-3.2965155533,-1.3392675507  
 H,0,-1.5380178131,-2.127967474,-1.3555575181  
 H,0,-1.8962205179,-3.0457672651,0.1251428725  
 H,0,-4.4657616162,-1.4159768238,-2.121497683  
 H,0,-4.6166118922,0.0633205504,-1.1521653746  
 H,0,-3.1377422516,-0.2413831461,-2.091765724  
 H,0,-4.995217383,-2.7575089257,0.0597254652  
 H,0,-3.968027274,-2.5198117639,1.4885909863  
 H,0,-5.0762996867,-1.2316219896,0.9649534276  
 H,0,0.2195666583,-0.5342456268,-0.0144913211  
 N,0,1.1301095981,-0.9562930468,0.2123338489  
 C,0,1.28103157,-1.5713895248,1.5337410231  
 C,0,2.7004161334,-1.3333251401,2.0375637266  
 H,0,0.5354125747,-1.1267969233,2.1967667141  
 H,0,1.0678632633,-2.6458212807,1.4614969094  
 C,0,2.1306860139,-0.7927466536,-0.643905482  
 N,0,3.369864175,-1.1931198143,-0.3480253829  
 C,0,4.4669183093,-1.0840167522,-1.3223814823  
 C,0,3.7032331163,-1.7693815689,0.9746973456  
 H,0,4.6891051693,-0.0380317687,-1.5538855917  
 H,0,5.3537691199,-1.5399710742,-0.8823715397  
 H,0,4.2326831608,-1.6200362319,-2.2457237614  
 H,0,3.7336318371,-2.8630979111,0.8826777026  
 C,0,1.8344464098,-0.125758832,-1.952239398  
 H,0,2.8404987028,-0.271131587,2.267926576  
 H,0,2.8781132166,-1.9007994432,2.9558633668  
 H,0,4.7075096784,-1.4259783056,1.2375593099  
 H,0,2.0523280374,0.9524100043,-1.8828258702  
 H,0,2.4143129054,-0.5621901869,-2.7662351989  
 H,0,0.7726587583,-0.218731329,-2.178125193

## Ts 2 from axial attack with DBU model, orientation B – 6-31G\* - PCM Dichloroethane

E(RB+HF-LYP) = -962.844439077

|                                            |                             |
|--------------------------------------------|-----------------------------|
| Zero-point correction=                     | 0.451581 (Hartree/Particle) |
| Thermal correction to Energy=              | 0.475623                    |
| Thermal correction to Enthalpy=            | 0.476567                    |
| Thermal correction to Gibbs Free Energy=   | 0.396212                    |
| Sum of electronic and zero-point Energies= | -962.392858                 |
| Sum of electronic and thermal Energies=    | -962.368816                 |

Sum of electronic and thermal Enthalpies= -962.367872  
 Sum of electronic and thermal Free Energies= -962.448227

|       | E (Thermal) | CV             | S              |
|-------|-------------|----------------|----------------|
|       | KCal/Mol    | Cal/Mol-Kelvin | Cal/Mol-Kelvin |
| Total | 298.458     | 89.686         | 169.122        |

C,0,2.039487441,-0.6931479636,1.8521617771  
 C,0,1.201896507,-1.94504621,1.5750614153  
 C,0,2.0140720171,-2.9998926408,0.814451181  
 C,0,2.8388319764,-2.4623709214,-0.3678612317  
 C,0,3.1408974777,-1.0870942321,-0.3970565066  
 C,0,2.6049627494,-0.1009531126,0.561847614  
 O,0,3.276045842,-3.3043924532,-1.2010202205  
 O,0,1.5713593505,0.4109171655,-0.3092109076  
 O,0,0.7392966785,1.6946194494,0.4019375419  
 C,0,0.9753842086,2.8901839747,-0.3489318163  
 C,0,2.4647922293,3.2614427388,-0.3116927732  
 C,0,0.4930721351,2.7387836269,-1.800062276  
 C,0,0.1452721878,3.9587890169,0.3873563563  
 H,0,3.7598061847,-0.7208193207,-1.2138944859  
 H,0,3.2999243876,0.7190261508,0.791402272  
 H,0,2.8835636929,-0.9442840386,2.511468584  
 H,0,1.4440213776,0.0723908265,2.3638090018  
 H,0,0.8157773665,-2.3631568791,2.5146460656  
 H,0,0.3274935486,-1.6557211532,0.9798144996  
 H,0,2.724124737,-3.4883882929,1.5010723293  
 H,0,1.3681471784,-3.8022434553,0.4348551483  
 H,0,0.6530384248,3.6650693856,-2.3644044907  
 H,0,1.0403342109,1.9312652143,-2.2941849905  
 H,0,-0.5779744417,2.505554005,-1.8316463622  
 H,0,2.6387436638,4.2246419277,-0.8058036767  
 H,0,2.8124999159,3.3375852231,0.7244431707  
 H,0,3.0594058994,2.4994861157,-0.8231847302  
 H,0,0.2738855061,4.937680659,-0.0898196152  
 H,0,-0.9217185565,3.7093751171,0.3672835204  
 H,0,0.4624210954,4.0387554605,1.4325177949  
 H,0,-0.7632824565,0.8425335605,0.1980727706  
 N,0,-1.7256896676,0.4448422454,0.2488932003  
 C,0,-2.5973518805,0.9758340544,1.2987598422  
 C,0,-3.6030507496,-0.0956311077,1.7054293112  
 H,0,-1.9592505497,1.2732236474,2.1352339673  
 H,0,-3.1116480636,1.8735229071,0.9302896706  
 C,0,-2.1039501423,-0.4810327472,-0.6181889434  
 N,0,-3.3363738999,-0.9966763264,-0.5889307651  
 C,0,-3.8255651534,-1.9655281613,-1.5721371786  
 C,0,-4.3076040341,-0.6298019354,0.4628426987  
 H,0,-3.8249942007,-2.9777642664,-1.1507731363  
 H,0,-4.8519127703,-1.6966768214,-1.8398529338  
 H,0,-3.2220857143,-1.9501530817,-2.4778101095  
 H,0,-5.0054101187,0.1108329189,0.0500997149  
 C,0,-1.1017125102,-0.9338766173,-1.6427076094  
 H,0,-3.0851109416,-0.9127679973,2.2212141552  
 H,0,-4.3451797273,0.3187613346,2.3946058029  
 H,0,-4.8816167419,-1.5309042851,0.7029514071  
 H,0,-1.0806983158,-2.0253488929,-1.7092227153  
 H,0,-1.3649799138,-0.5393386889,-2.6314682775  
 H,0,-0.1031014286,-0.5823985798,-1.3707338722

**Ts 2 from axial attack with DBU model, orientation B – 6-31+G\*\* - PCM Dichloroethane**

E(RB+HF-LYP) = -962.927256281

|                                              |                             |
|----------------------------------------------|-----------------------------|
| Zero-point correction=                       | 0.447886 (Hartree/Particle) |
| Thermal correction to Energy=                | 0.471236                    |
| Thermal correction to Enthalpy=              | 0.472181                    |
| Thermal correction to Gibbs Free Energy=     | 0.394609                    |
| Sum of electronic and zero-point Energies=   | -962.479371                 |
| Sum of electronic and thermal Energies=      | -962.456020                 |
| Sum of electronic and thermal Enthalpies=    | -962.455076                 |
| Sum of electronic and thermal Free Energies= | -962.532648                 |

|       | E (Thermal) | CV             | S              |
|-------|-------------|----------------|----------------|
|       | KCal/Mol    | Cal/Mol-Kelvin | Cal/Mol-Kelvin |
| Total | 295.705     | 88.382         | 163.264        |

C,0,2.0039412257,-0.7283985773,1.8757071373  
 C,0,1.2446342329,-1.9976574284,1.475662681  
 C,0,2.1419735833,-2.9710732759,0.6996219235  
 C,0,3.0158085989,-2.3292418357,-0.3808079178  
 C,0,3.2701175724,-0.9430334693,-0.3188462293  
 C,0,2.6216580622,-0.0391173033,0.6601515966  
 O,0,3.5525708436,-3.0992540231,-1.2379111521  
 O,0,1.6542506974,0.4020976017,-0.2957269375  
 O,0,0.6323576524,1.6830018092,0.3840019137  
 C,0,0.861131191,2.9008287008,-0.3243487875  
 C,0,2.3164268827,3.3620597378,-0.1448344899  
 C,0,0.5260685083,2.7475214233,-1.8184961968  
 C,0,-0.0938716542,3.9206380399,0.3314969904  
 H,0,3.9285878904,-0.5048632737,-1.0651640981  
 H,0,3.2534508477,0.804519738,0.9686836107  
 H,0,2.8154250348,-0.9761766691,2.5753184492  
 H,0,1.3397129218,-0.0202848533,2.3838409005  
 H,0,0.8350441401,-2.4929616057,2.3650777707  
 H,0,0.3900236886,-1.7129626915,0.8520904349  
 H,0,2.8321303208,-3.4776804145,1.3921414987  
 H,0,1.5515701205,-3.7659113252,0.2279914988  
 H,0,0.6848535614,3.6908548811,-2.3535515442  
 H,0,1.1609866423,1.9801988877,-2.2695093397  
 H,0,-0.5219178034,2.456278984,-1.9526919901  
 H,0,2.4763447301,4.3381346254,-0.6172243994  
 H,0,2.558095898,3.4499092316,0.9196885729  
 H,0,3.0027464078,2.6430657944,-0.6000366363  
 H,0,0.0229665005,4.9052416982,-0.1366538401  
 H,0,-1.1376421957,3.610461838,0.2143394798  
 H,0,0.1228005546,4.0168130801,1.4001944091  
 H,0,-0.8299632593,0.8571980326,0.2362685533  
 N,0,-1.7806879564,0.412188964,0.2847405193  
 C,0,-2.6606959276,0.8332881578,1.3780176602  
 C,0,-3.6144770399,-0.3040124904,1.7277284444  
 H,0,-2.0274212728,1.104479132,2.2269681993  
 H,0,-3.2196381923,1.7283271447,1.07540394  
 C,0,-2.1329150998,-0.4756229227,-0.6312367565  
 N,0,-3.3387980677,-1.0546566365,-0.617525758  
 C,0,-3.7935194798,-1.9940411518,-1.6460681516  
 C,0,-4.3130163285,-0.7909756914,0.4627599186  
 H,0,-3.7589403155,-3.0227697291,-1.2696473403  
 H,0,-4.8275272673,-1.7492364975,-1.9061045941  
 H,0,-3.1895105621,-1.9196327633,-2.5477022413  
 H,0,-5.0437457757,-0.0554923808,0.1024010017  
 C,0,-1.1275517688,-0.8158163403,-1.6950656553  
 H,0,-3.0563335142,-1.1291649417,2.1866384809  
 H,0,-4.3627649329,0.0347918863,2.4500107091  
 H,0,-4.8473151,-1.7273510078,0.6540064415  
 H,0,-1.0150514793,-1.8989724929,-1.7922129312  
 H,0,-1.4505224036,-0.4208968715,-2.6650167985  
 H,0,-0.1577519175,-0.3874802703,-1.4376151236

### Ts 1 from equatorial attack with DBU model, orientation A – 6-31G\* - Gas Phase

E(RB+HF-LYP) = -962.820709099

|                                              |                             |
|----------------------------------------------|-----------------------------|
| Zero-point correction=                       | 0.452570 (Hartree/Particle) |
| Thermal correction to Energy=                | 0.476330                    |
| Thermal correction to Enthalpy=              | 0.477274                    |
| Thermal correction to Gibbs Free Energy=     | 0.398056                    |
| Sum of electronic and zero-point Energies=   | -962.368139                 |
| Sum of electronic and thermal Energies=      | -962.344379                 |
| Sum of electronic and thermal Enthalpies=    | -962.343435                 |
| Sum of electronic and thermal Free Energies= | -962.422653                 |

|       | E (Thermal) | CV             | S              |
|-------|-------------|----------------|----------------|
|       | KCal/Mol    | Cal/Mol-Kelvin | Cal/Mol-Kelvin |
| Total | 298.902     | 89.330         | 166.729        |

C,0,-1.4373411217,2.3628372674,0.9399629472  
 C,0,-0.2410353699,3.21439458,1.384217235  
 C,0,1.0712287712,2.4949883366,1.0630461008  
 C,0,1.1901356482,2.1345983485,-0.4274928379  
 C,0,-0.0246296462,2.0311123281,-1.1458312282  
 C,0,-1.2760441752,1.8571416803,-0.4941155955  
 O,0,2.3424063332,1.9607236225,-0.9064389352  
 O,0,-1.4293439545,0.1061393746,-0.4137237844  
 O,0,-2.383620142,-0.4506970103,0.5631586891  
 C,0,-3.4954639433,-1.0747517432,-0.1108444594  
 C,0,-4.254920478,-0.0585328985,-0.9719469541  
 C,0,-3.0018601157,-2.2559176104,-0.9570720672  
 C,0,-4.3635264857,-1.5594870396,1.0582289312  
 H,0,0.0306070178,1.8918025285,-2.222759844  
 H,0,-2.1567496079,2.0111674506,-1.1147447165  
 H,0,-2.3646698502,2.9444962563,1.0182405978  
 H,0,-1.5659459988,1.5061978586,1.611304637  
 H,0,-0.2576425541,4.1745360874,0.8529265094  
 H,0,-0.3159324401,3.4401213742,2.4567669532  
 H,0,1.9493858599,3.0960633017,1.3267029282  
 H,0,1.131743769,1.5726278828,1.6628459733  
 H,0,-3.8400191428,-2.7745118316,-1.4370552745  
 H,0,-2.321680305,-1.9000003812,-1.7356428607  
 H,0,-2.4649717106,-2.9766307817,-0.3293996494  
 H,0,-5.1436172371,-0.5170242689,-1.4216401268  
 H,0,-4.5774825989,0.7926082295,-0.3624398667  
 H,0,-3.6139460857,0.3122041708,-1.776239526  
 H,0,-5.2552003458,-2.0753731154,0.6850458805  
 H,0,-3.8024618544,-2.2539127514,1.6928122685  
 H,0,-4.6845754003,-0.7131224019,1.6743171812  
 H,0,-0.0813389599,-0.7866799189,-0.1677532991  
 N,0,0.8296067383,-1.2562935043,0.1102240664  
 C,0,0.9784220104,-1.5928171598,1.524711753  
 C,0,2.3572484501,-1.1685361236,2.0230026441  
 H,0,0.1731827254,-1.0863163344,2.0624347244  
 H,0,0.8332454293,-2.6734747485,1.6559995973  
 C,0,1.850809559,-1.1170773404,-0.7160164805  
 N,0,3.1135922923,-1.3586572447,-0.3329299615  
 C,0,4.2395305872,-0.9670791049,-1.1888979939  
 C,0,3.4314871843,-1.6864274421,1.0699100028  
 H,0,5.1397704812,-1.4686451423,-0.8281014804  
 H,0,4.0716632265,-1.2768593897,-2.2209421171

H,0,4.3710263392,0.1204448086,-1.1550880125  
H,0,3.5493658051,-2.7747615449,1.1610897596  
C,0,1.5648144754,-0.7074377108,-2.1296554836  
H,0,2.4129771898,-0.0764597813,2.0662625527  
H,0,2.5396470996,-1.5581477019,3.0294720072  
H,0,4.395834301,-1.2290229188,1.306543421  
H,0,2.0001726544,0.2872080899,-2.2898630865  
H,0,1.9882210077,-1.4325340042,-2.8326126064  
H,0,0.4883279776,-0.6427238807,-2.2807480978

### Ts 1 from equatorial attack with DBU model, orientation A – 6-31+G\*\* - Gas Phase

E(RB+HF-LYP) = -962.898243086

|                                              |                             |
|----------------------------------------------|-----------------------------|
| Zero-point correction=                       | 0.448904 (Hartree/Particle) |
| Thermal correction to Energy=                | 0.473024                    |
| Thermal correction to Enthalpy=              | 0.473968                    |
| Thermal correction to Gibbs Free Energy=     | 0.394255                    |
| Sum of electronic and zero-point Energies=   | -962.449339                 |
| Sum of electronic and thermal Energies=      | -962.425219                 |
| Sum of electronic and thermal Enthalpies=    | -962.424275                 |
| Sum of electronic and thermal Free Energies= | -962.503988                 |

|       | E (Thermal) | CV             | S              |
|-------|-------------|----------------|----------------|
|       | KCal/Mol    | Cal/Mol-Kelvin | Cal/Mol-Kelvin |
| Total | 296.827     | 90.264         | 167.770        |

C,0,-1.4758490062,2.389675029,1.0221446007  
C,0,-0.2839536887,3.256657393,1.450907499  
C,0,1.0378370924,2.5698633039,1.0942808824  
C,0,1.1294721529,2.2040712554,-0.3949058314  
C,0,-0.0944891334,2.0745652612,-1.093275224  
C,0,-1.3338910205,1.8858503151,-0.4146503237  
O,0,2.2760119313,2.042656935,-0.8987415671  
O,0,-1.4263695276,0.145025733,-0.3315244681  
O,0,-2.4312617572,-0.4583157369,0.572771268  
C,0,-3.4824483749,-1.1084431341,-0.1787641895  
C,0,-4.2263853921,-0.1019159717,-1.0653080201  
C,0,-2.9046123923,-2.2589888553,-1.0143032725  
C,0,-4.4015017889,-1.6431953426,0.9283660307  
H,0,-0.055794441,1.9321558324,-2.1699587546  
H,0,-2.2272891188,2.0239341005,-1.0201367719  
H,0,-2.4094140588,2.9572776059,1.1170495257  
H,0,-1.5802704122,1.5292697732,1.6931667172  
H,0,-0.3293863857,4.2243158712,0.9359674444  
H,0,-0.339213487,3.4643308235,2.5277973086  
H,0,1.9042637762,3.1984984852,1.3284019308  
H,0,1.1470523998,1.6520045244,1.6927968413  
H,0,-3.7022309297,-2.7957928839,-1.5397615265  
H,0,-2.2016839393,-1.8722206616,-1.7567108467  
H,0,-2.3763846624,-2.9701888578,-0.3700546986  
H,0,-5.0719457585,-0.5855643371,-1.5671880628  
H,0,-4.6114077734,0.7271131775,-0.4629719831  
H,0,-3.5589295508,0.3018458102,-1.8307169509  
H,0,-5.2502496663,-2.1774714905,0.4884541778  
H,0,-3.8587437988,-2.3338031803,1.5815416915  
H,0,-4.7874716687,-0.8212157395,1.5390326748  
H,0,-0.0491757598,-0.6902997058,-0.0785233973  
N,0,0.8673119862,-1.1619613999,0.177965068  
C,0,1.0715234746,-1.4808205525,1.5901500931  
C,0,2.4859514247,-1.0920246443,2.0116161199  
H,0,0.3123522145,-0.9397503842,2.1592972419  
H,0,0.898819799,-2.5536432772,1.7482618674

C,0,1.8515192078,-1.1220744308,-0.7026061433  
 N,0,3.1128865134,-1.4362481432,-0.3660228282  
 C,0,4.2284520495,-1.2791120263,-1.3026459757  
 C,0,3.4949491815,-1.6911973013,1.0366984752  
 H,0,5.0153110938,-1.9848030198,-1.0253818753  
 H,0,3.9201182453,-1.5001421634,-2.3227457612  
 H,0,4.6210045969,-0.2565156166,-1.2627260905  
 H,0,3.5943503272,-2.7752040975,1.1835084183  
 C,0,1.5227830944,-0.7377518204,-2.1136946504  
 H,0,2.5830214898,-0.0022534026,2.0109993731  
 H,0,2.6976813823,-1.4497858144,3.0236493873  
 H,0,4.4809065831,-1.2442318399,1.193762172  
 H,0,2.0194560506,0.2117926606,-2.3431134742  
 H,0,1.8423036666,-1.5166148535,-2.8125414142  
 H,0,0.4483738322,-0.5914568559,-2.2088531276

### Ts 1 from equatorial attack with DBU model, orientation A – 6-31G\* - PCM Dichloroethane

E(RB+HF-LYP) = -962.838772209

|                                              |                             |
|----------------------------------------------|-----------------------------|
| Zero-point correction=                       | 0.450679 (Hartree/Particle) |
| Thermal correction to Energy=                | 0.475045                    |
| Thermal correction to Enthalpy=              | 0.475989                    |
| Thermal correction to Gibbs Free Energy=     | 0.394101                    |
| Sum of electronic and zero-point Energies=   | -962.388093                 |
| Sum of electronic and thermal Energies=      | -962.363727                 |
| Sum of electronic and thermal Enthalpies=    | -962.362783                 |
| Sum of electronic and thermal Free Energies= | -962.444671                 |

|       | E (Thermal) | CV             | S              |
|-------|-------------|----------------|----------------|
|       | KCal/Mol    | Cal/Mol-Kelvin | Cal/Mol-Kelvin |
| Total | 298.095     | 89.958         | 172.348        |

C,0,-1.7839749634,2.1510149268,1.1817669634  
 C,0,-0.7188189634,3.1315279268,1.6949509634  
 C,0,0.6472910366,2.8467889268,1.0615289634  
 C,0,0.5839340366,2.8854589268,-0.4709660366  
 C,0,-0.6481889634,2.4939849268,-1.0623510366  
 C,0,-1.6966559634,1.9278439268,-0.3205380366  
 O,0,1.5990060366,3.2511979268,-1.1135130366  
 O,0,-1.3795449634,0.0592049268,-0.4681560366  
 O,0,-2.1195529634,-0.8070540732,0.4530669634  
 C,0,-3.0761099634,-1.6131440732,-0.2673380366  
 C,0,-4.0842419634,-0.7275470732,-1.0095630366  
 C,0,-2.3454149634,-2.5496810732,-1.2387950366  
 C,0,-3.7636219634,-2.4067060732,0.8508799634  
 H,0,-0.7080029634,2.5158519268,-2.1499990366  
 H,0,-2.6548159634,1.8289109268,-0.8228270366  
 H,0,-2.7854609634,2.5284599268,1.4292469634  
 H,0,-1.6989569634,1.1831439268,1.6880889634  
 H,0,-1.0155489634,4.1577369268,1.4381439634  
 H,0,-0.6603539634,3.0853919268,2.7905629634  
 H,0,1.4063010366,3.5680239268,1.3873159634  
 H,0,1.0025970366,1.8514229268,1.3717239634  
 H,0,-3.0549969634,-3.1784610732,-1.7893670366  
 H,0,-1.7681079634,-1.9608700732,-1.9566440366  
 H,0,-1.6562869634,-3.2049080732,-0.6931400366  
 H,0,-4.8561839634,-1.3386960732,-1.4919130366  
 H,0,-4.5747279634,-0.0406360732,-0.3107350366  
 H,0,-3.5761419634,-0.1388380732,-1.7778060366  
 H,0,-4.5085289634,-3.0927220732,0.4325619634  
 H,0,-3.0293689634,-2.9951160732,1.4120069634

H,0,-4.2692529634,-1.7301830732,1.5485469634  
H,0,0.0577630366,-0.5230850732,-0.1252630366  
N,0,0.9918270366,-0.9535840732,0.1682389634  
C,0,1.0527160366,-1.6253820732,1.4660879634  
C,0,2.4597530366,-1.5088380732,2.0419319634  
H,0,0.3050320366,-1.1602690732,2.1128389634  
H,0,0.7677790366,-2.6783780732,1.3403359634  
C,0,2.0340060366,-0.7853840732,-0.6219760366  
N,0,3.2547910366,-1.2263580732,-0.2845570366  
C,0,4.4322110366,-1.0991000732,-1.1413130366  
C,0,3.4791620366,-1.9363170732,0.9892969634  
H,0,4.8004100366,-2.0934360732,-1.4208520366  
H,0,4.2051880366,-0.5396270732,-2.0458980366  
H,0,5.2238020366,-0.5732090732,-0.5962840366  
H,0,3.4295130366,-3.0185100732,0.8063989634  
C,0,1.7957850366,-0.0642120732,-1.9207200366  
H,0,2.6557710366,-0.4732640732,2.3442729634  
H,0,2.5641320366,-2.1407060732,2.9295409634  
H,0,4.4962200366,-1.7023010732,1.3194749634  
H,0,2.2561070366,0.9302159268,-1.9018480366  
H,0,2.1906820366,-0.6327010732,-2.7675070366  
H,0,0.7228640366,0.0777169268,-2.0552350366

### Ts 1 from equatorial attack with DBU model, orientation A – 6-31+G\*\* - PCM Dichloroethane

E(RB+HF-LYP) = -962.921368923

|                                              |                             |
|----------------------------------------------|-----------------------------|
| Zero-point correction=                       | 0.447221 (Hartree/Particle) |
| Thermal correction to Energy=                | 0.470874                    |
| Thermal correction to Enthalpy=              | 0.471819                    |
| Thermal correction to Gibbs Free Energy=     | 0.392549                    |
| Sum of electronic and zero-point Energies=   | -962.474148                 |
| Sum of electronic and thermal Energies=      | -962.450494                 |
| Sum of electronic and thermal Enthalpies=    | -962.449550                 |
| Sum of electronic and thermal Free Energies= | -962.528820                 |

|       | E (Thermal) | CV             | S              |
|-------|-------------|----------------|----------------|
|       | KCal/Mol    | Cal/Mol-Kelvin | Cal/Mol-Kelvin |
| Total | 295.478     | 88.645         | 166.837        |

C,0,-1.9634489146,1.9762200061,1.2606550183  
C,0,-1.0430899146,3.1450370061,1.6465300183  
C,0,0.2676170854,3.1128600061,0.8499200183  
C,0,0.0121730854,3.1037220061,-0.6577559817  
C,0,-1.1591369146,2.4379180061,-1.1063609817  
C,0,-1.9990329146,1.7230890061,-0.2372889817  
O,0,0.8347810854,3.6828860061,-1.4217259817  
O,0,-1.3461939146,-0.0860459939,-0.3819049817  
O,0,-1.9667909146,-1.0578009939,0.5214930183  
C,0,-2.7634099146,-2.0168249939,-0.2150059817  
C,0,-3.9033549146,-1.3148289939,-0.9635759817  
C,0,-1.8767439146,-2.8131469939,-1.1819539817  
C,0,-3.3150459146,-2.9237149939,0.8923630183  
H,0,-1.3433509146,2.4076600061,-2.1793739817  
H,0,-2.9606989146,1.4109570061,-0.6312859817  
H,0,-2.9844629146,2.1746320061,1.6113680183  
H,0,-1.6510609146,1.0544180061,1.7634500183  
H,0,-1.5529089146,4.0954210061,1.4392740183  
H,0,-0.8405909146,3.1239770061,2.7248600183  
H,0,0.9039270854,3.9733890061,1.0848480183  
H,0,0.8422040854,2.2100960061,1.1068990183  
H,0,-2.4634259146,-3.5789389939,-1.7016949817  
H,0,-1.4368789146,-2.1461599939,-1.9277829817

H,0,-1.0668399146,-3.3092529939,-0.6362309817  
 H,0,-4.5405699146,-2.0501129939,-1.4677269817  
 H,0,-4.5235349146,-0.7417769939,-0.2660279817  
 H,0,-3.5011209146,-0.6328079939,-1.7170329817  
 H,0,-3.9410269146,-3.7104349939,0.4580100183  
 H,0,-2.4979399146,-3.3984199939,1.4454410183  
 H,0,-3.9231689146,-2.3475589939,1.5973030183  
 H,0,0.1493050854,-0.4284749939,-0.0081459817  
 N,0,1.1327180854,-0.7386539939,0.2857890183  
 C,0,1.3292960854,-1.1892499939,1.6641230183  
 C,0,2.7625100854,-0.9008449939,2.0991470183  
 H,0,0.6013400854,-0.6691129939,2.2911040183  
 H,0,1.1105210854,-2.2630419939,1.7292830183  
 C,0,2.1057980854,-0.6901759939,-0.6039449817  
 N,0,3.3624830854,-1.0459069939,-0.2998329817  
 C,0,4.4605340854,-1.0639239939,-1.2672879817  
 C,0,3.7308920854,-1.4691709939,1.0665650183  
 H,0,4.9548530854,-2.0403249939,-1.2281779817  
 H,0,4.1018270854,-0.9006249939,-2.2805789817  
 H,0,5.1939290854,-0.2884359939,-1.0192149817  
 H,0,3.7488050854,-2.5669059939,1.1018410183  
 C,0,1.7512480854,-0.2190789939,-1.9878919817  
 H,0,2.9137720854,0.1809750061,2.1941070183  
 H,0,2.9640400854,-1.3523469939,3.0752860183  
 H,0,4.7489260854,-1.1134369939,1.2547730183  
 H,0,2.3545750854,0.6471310061,-2.2741299817  
 H,0,1.9183670854,-1.0145389939,-2.7213009817  
 H,0,0.6995770854,0.0663570061,-2.0131479817

### Intermediate from equatorial attack with DBU model, orientation A – 6-31G\* Gas Phase

E(RB+HF-LYP) = -962.825708289

|                                              |                             |
|----------------------------------------------|-----------------------------|
| Zero-point correction=                       | 0.453871 (Hartree/Particle) |
| Thermal correction to Energy=                | 0.477904                    |
| Thermal correction to Enthalpy=              | 0.478848                    |
| Thermal correction to Gibbs Free Energy=     | 0.398726                    |
| Sum of electronic and zero-point Energies=   | -962.371837                 |
| Sum of electronic and thermal Energies=      | -962.347804                 |
| Sum of electronic and thermal Enthalpies=    | -962.346860                 |
| Sum of electronic and thermal Free Energies= | -962.426982                 |

|       | E (Thermal) | CV             | S              |
|-------|-------------|----------------|----------------|
|       | KCal/Mol    | Cal/Mol-Kelvin | Cal/Mol-Kelvin |
| Total | 299.889     | 90.570         | 168.631        |

C,0,-1.4220643096,2.1441709402,1.3335880124  
 C,0,-0.3697461018,3.2555331106,1.3158561508  
 C,0,1.0139196314,2.6498840978,1.061729202  
 C,0,1.0538782675,1.7543175527,-0.1873530132  
 C,0,-0.1599133543,1.2781884036,-0.693376995  
 C,0,-1.4788241786,1.4018755997,-0.0126218122  
 O,0,2.2027225366,1.4945544546,-0.6752129633  
 O,0,-1.8848877839,0.0077383161,0.1982968029  
 O,0,-3.2699985267,0.0082574878,0.727184125  
 C,0,-4.0740312333,-0.8754888825,-0.0761751283  
 C,0,-4.1541209905,-0.3804012237,-1.5259442725  
 C,0,-3.5217153897,-2.3062289788,-0.0043301092  
 C,0,-5.442153295,-0.7829102366,0.6129417072  
 H,0,-0.1774084392,0.9010923619,-1.7157914412  
 H,0,-2.2508026982,1.8463286992,-0.6586856925  
 H,0,-2.4151950132,2.5286331875,1.589433647  
 H,0,-1.1594862298,1.4118913654,2.1088381372

H,0,-0.6038677845,3.9784997024,0.521889557  
 H,0,-0.3844585871,3.8116156821,2.2628149047  
 H,0,1.7798623799,3.4220831407,0.9209502228  
 H,0,1.3283262088,2.0680499566,1.9435736374  
 H,0,-4.1714654844,-3.0023253036,-0.5479023368  
 H,0,-2.5215499658,-2.3519592351,-0.4435655759  
 H,0,-3.456626364,-2.6342256329,1.0387833944  
 H,0,-4.8058754797,-1.0296584068,-2.122435561  
 H,0,-4.5564175023,0.6377720323,-1.5605304284  
 H,0,-3.1601859302,-0.376428602,-1.9812006747  
 H,0,-6.1673619445,-1.4263194566,0.1026172603  
 H,0,-5.3690106544,-1.1015145263,1.6578867058  
 H,0,-5.8153058987,0.2462784048,0.5915167255  
 H,0,0.5268091766,-0.6724698633,-0.5555494509  
 N,0,1.3373999775,-1.2802563058,-0.3120382324  
 C,0,1.4186891716,-1.5647250305,1.1243988359  
 C,0,2.6693073591,-0.9181033144,1.7147442457  
 H,0,0.5012228751,-1.1747429,1.5714077819  
 H,0,1.4349477318,-2.652396359,1.2729808066  
 C,0,2.4293828594,-1.0114258665,-1.0315986973  
 N,0,3.6580898131,-1.2240051032,-0.5372500102  
 C,0,4.8550447839,-0.944653254,-1.3263154631  
 C,0,3.887172325,-1.364425467,0.914230463  
 H,0,5.6815261555,-1.5375611393,-0.924869541  
 H,0,4.713157707,-1.2267118972,-2.3695045187  
 H,0,5.1140443108,0.120090318,-1.2720710227  
 H,0,4.1490028133,-2.4098274154,1.1286572364  
 C,0,2.2493444192,-0.7094723664,-2.4918126853  
 H,0,2.5819661921,0.1690314945,1.6439972479  
 H,0,2.7959812356,-1.1973915844,2.7655524389  
 H,0,4.7540394246,-0.7463167944,1.170231354  
 H,0,2.8068528776,0.1840668059,-2.7696978884  
 H,0,2.5760968338,-1.5663656055,-3.0958394465  
 H,0,1.1950439245,-0.5306011384,-2.6983761441

### Intermediate from equatorial attack with DBU model, orientation A – 6-31+G\*\* Gas Phase

E(RB+HF-LYP) = -962.902046132

|                                              |                             |
|----------------------------------------------|-----------------------------|
| Zero-point correction=                       | 0.450332 (Hartree/Particle) |
| Thermal correction to Energy=                | 0.474633                    |
| Thermal correction to Enthalpy=              | 0.475577                    |
| Thermal correction to Gibbs Free Energy=     | 0.394600                    |
| Sum of electronic and zero-point Energies=   | -962.451714                 |
| Sum of electronic and thermal Energies=      | -962.427413                 |
| Sum of electronic and thermal Enthalpies=    | -962.426469                 |
| Sum of electronic and thermal Free Energies= | -962.507446                 |

|       | E (Thermal) | CV             | S              |
|-------|-------------|----------------|----------------|
|       | KCal/Mol    | Cal/Mol-Kelvin | Cal/Mol-Kelvin |
| Total | 297.837     | 91.368         | 170.430        |

C,0,-1.4449507487,2.0771116129,1.389955846  
 C,0,-0.4367169242,3.229536107,1.3613849562  
 C,0,0.965826933,2.6893676137,1.0608041852  
 C,0,1.0110694686,1.7833994073,-0.1787000739  
 C,0,-0.1876417851,1.2287664729,-0.6441453513  
 C,0,-1.5115085087,1.3652214134,0.0308028188  
 O,0,2.1553725047,1.5773598887,-0.7078896404  
 O,0,-1.9599235484,-0.0225775104,0.2047498737  
 O,0,-3.3559259616,0.005710642,0.7020431072  
 C,0,-4.1689693603,-0.8541659025,-0.1262520043  
 C,0,-4.2093339047,-0.3420985396,-1.5721390126

C,0,-3.6531839611,-2.2986082196,-0.0578099821  
 C,0,-5.5474461071,-0.7344770919,0.5377323009  
 H,0,-0.2059154977,0.8490328879,-1.6650917098  
 H,0,-2.2678621743,1.8428647725,-0.6106793685  
 H,0,-2.4432321696,2.4196581764,1.6801843553  
 H,0,-1.1315060243,1.3401744473,2.1415666649  
 H,0,-0.7233002039,3.954737937,0.5870889262  
 H,0,-0.4475329938,3.7696818804,2.3169954519  
 H,0,1.6857072529,3.4969582503,0.8851284256  
 H,0,1.3416474843,2.1294369507,1.9319622483  
 H,0,-4.3130801103,-2.9692824864,-0.6196354934  
 H,0,-2.6480187336,-2.3671798948,-0.4811357272  
 H,0,-3.6154790802,-2.6382038949,0.9822699709  
 H,0,-4.8676966813,-0.9704741797,-2.1823669499  
 H,0,-4.5852579554,0.6854670512,-1.6049475131  
 H,0,-3.2094055136,-0.3611907635,-2.0128786222  
 H,0,-6.2737335714,-1.3572203648,0.0048984174  
 H,0,-5.5037349658,-1.0653704498,1.5798806405  
 H,0,-5.8979244555,0.3020682535,0.5176857086  
 H,0,0.614775531,-0.6757611784,-0.4652131056  
 N,0,1.4409165146,-1.2685106908,-0.2326914593  
 C,0,1.5856245298,-1.5439864736,1.1995084975  
 C,0,2.844906568,-0.865125309,1.7326792102  
 H,0,0.6819605129,-1.1760098532,1.6895843917  
 H,0,1.6336070753,-2.6302042466,1.3499422326  
 C,0,2.5021315725,-1.0493763274,-1.0088438769  
 N,0,3.7486684508,-1.2285588325,-0.5505494771  
 C,0,4.9211550555,-1.0393413843,-1.4035014608  
 C,0,4.0400984955,-1.3059238754,0.8961075845  
 H,0,5.7355003512,-1.6556737939,-1.0136492233  
 H,0,4.7190195734,-1.353916292,-2.426144436  
 H,0,5.2345615377,0.0115853942,-1.4041823973  
 H,0,4.3408439249,-2.3347788806,1.1358896746  
 C,0,2.2668509307,-0.7703162944,-2.463746335  
 H,0,2.7303859326,0.2193621126,1.6549665345  
 H,0,3.0154086507,-1.1270711707,2.7813197751  
 H,0,4.8982971892,-0.653910967,1.0888986718  
 H,0,2.8100514801,0.1224033028,-2.7737414711  
 H,0,2.5754939703,-1.6332720735,-3.0667877492  
 H,0,1.2056674265,-0.5982676833,-2.6333723074

### Intermediate from equatorial attack with DBU model, orientation A – 6-31G\* – PCM Dichloroethane

E(RB+HF-LYP) = -962.845008985

|                                              |                             |
|----------------------------------------------|-----------------------------|
| Zero-point correction=                       | 0.452764 (Hartree/Particle) |
| Thermal correction to Energy=                | 0.475396                    |
| Thermal correction to Enthalpy=              | 0.476341                    |
| Thermal correction to Gibbs Free Energy=     | 0.400257                    |
| Sum of electronic and zero-point Energies=   | -962.392245                 |
| Sum of electronic and thermal Energies=      | -962.369613                 |
| Sum of electronic and thermal Enthalpies=    | -962.368668                 |
| Sum of electronic and thermal Free Energies= | -962.444752                 |

|       | E (Thermal)<br>KCal/Mol | CV<br>Cal/Mol-Kelvin | S<br>Cal/Mol-Kelvin |
|-------|-------------------------|----------------------|---------------------|
| Total | 298.316                 | 86.774               | 160.132             |

C,0,-1.1266346035,2.3617806557,0.5063772934  
 C,0,-0.2373528575,3.5513699218,0.1334251454  
 C,0,1.0608111749,3.0467938706,-0.5032604839  
 C,0,0.8145482975,2.1006947994,-1.6914215663

C,0,-0.4350370743,1.494755378,-1.7828331593  
 C,0,-1.4567372888,1.4842572394,-0.7156809108  
 O,0,1.7684967562,1.9629064634,-2.5310031659  
 O,0,-1.5095278907,0.0477555534,-0.3072805097  
 O,0,-2.5575274055,-0.1450852688,0.7401928836  
 C,0,-3.4885550971,-1.1580655069,0.299962966  
 C,0,-4.2109982466,-0.7224388442,-0.9801195114  
 C,0,-2.7654195834,-2.4972544415,0.1043551297  
 C,0,-4.4635083441,-1.2328771457,1.4834462793  
 H,0,-0.6500331769,0.9043715998,-2.6738825635  
 H,0,-2.4751133578,1.690595723,-1.075750786  
 H,0,-2.050895245,2.6886937887,0.9960229043  
 H,0,-0.591503629,1.7425447761,1.2385731551  
 H,0,-0.7644263683,4.2016765747,-0.578687863  
 H,0,-0.0308802256,4.1602783924,1.0246358464  
 H,0,1.6802674087,3.8760185696,-0.8692109956  
 H,0,1.6692249532,2.5255642819,0.254691938  
 H,0,-3.480750576,-3.2898682044,-0.1432169298  
 H,0,-2.03760936,-2.4272617938,-0.7091284825  
 H,0,-2.2379179729,-2.7832772011,1.0213400816  
 H,0,-4.9629296434,-1.4661654427,-1.2685951001  
 H,0,-4.7164954167,0.2372476353,-0.8273775234  
 H,0,-3.5004876588,-0.614515773,-1.804406744  
 H,0,-5.2353264891,-1.9850543296,1.287034597  
 H,0,-3.9364328021,-1.5097158861,2.40260782  
 H,0,-4.953907495,-0.2665982025,1.6415238492  
 H,0,0.0785962637,-0.669208753,0.2144305533  
 N,0,0.9816959418,-0.967423538,0.6185590125  
 C,0,1.0902038976,-0.9619892084,2.078027359  
 C,0,2.4946116258,-0.5193604959,2.4724986762  
 H,0,0.3243220264,-0.2848177919,2.4642615493  
 H,0,0.8751025398,-1.9669604608,2.4648190468  
 C,0,2.0026307617,-1.1904609413,-0.1984211258  
 N,0,3.2235737597,-1.4443409188,0.283453564  
 C,0,4.3821422106,-1.7161284786,-0.5727931847  
 C,0,3.5208633756,-1.3690734557,1.7313160162  
 H,0,5.0761421688,-2.3485966333,-0.0139284674  
 H,0,4.0932802091,-2.2486487223,-1.4779557353  
 H,0,4.8932780273,-0.786098086,-0.8481514963  
 H,0,3.555095245,-2.3907144549,2.1317111955  
 C,0,1.7426805863,-1.1261028659,-1.6733044592  
 H,0,2.6337774158,0.5385802458,2.2209751362  
 H,0,2.6434917357,-0.6295166311,3.5511190241  
 H,0,4.5205552535,-0.9356029002,1.8356435069  
 H,0,2.0751732138,-0.154069548,-2.0759904772  
 H,0,2.2423895907,-1.9377102811,-2.2066503325  
 H,0,0.6701007651,-1.1888361625,-1.8552651897

## Intermediate from equatorial attack with DBU model, orientation A – 6-31+G\*\* - PCM Dichloroethane

E(RB+HF-LYP) = -962.929006771

|                                              |                             |
|----------------------------------------------|-----------------------------|
| Zero-point correction=                       | 0.449391 (Hartree/Particle) |
| Thermal correction to Energy=                | 0.473296                    |
| Thermal correction to Enthalpy=              | 0.474240                    |
| Thermal correction to Gibbs Free Energy=     | 0.393564                    |
| Sum of electronic and zero-point energies=   | -962.479616                 |
| Sum of electronic and thermal Energies=      | -962.455711                 |
| Sum of electronic and thermal Enthalpies=    | -962.454767                 |
| Sum of electronic and thermal Free Energies= | -962.535442                 |

E (Thermal)

CV

S

| Total                                         | KCal/Mol<br>296.997 | Cal/Mol-Kelvin<br>89.680 | Cal/Mol-Kelvin<br>169.795 |
|-----------------------------------------------|---------------------|--------------------------|---------------------------|
| C,0,-1.4364469239,1.6134040963,1.5762306563   |                     |                          |                           |
| C,0,-1.0758284227,3.0820052328,1.8163868289   |                     |                          |                           |
| C,0,0.0866411024,3.4973419075,0.9064580835    |                     |                          |                           |
| C,0,-0.1654175588,3.1736269043,-0.5723319167  |                     |                          |                           |
| C,0,-1.1077999791,2.2004590688,-0.8795620378  |                     |                          |                           |
| C,0,-1.8119511968,1.3478994911,0.1091375941   |                     |                          |                           |
| O,0,0.4894399283,3.8649957811,-1.4389757858   |                     |                          |                           |
| O,0,-1.4152810269,-0.0441937434,-0.2679792077 |                     |                          |                           |
| O,0,-2.1947360602,-1.0245342729,0.5370788722  |                     |                          |                           |
| C,0,-2.9412123608,-1.9000087536,-0.3509905791 |                     |                          |                           |
| C,0,-3.9494759942,-1.1026236151,-1.186650682  |                     |                          |                           |
| C,0,-1.981075679,-2.6952843887,-1.2444430505  |                     |                          |                           |
| C,0,-3.6586937364,-2.8250878809,0.6412722646  |                     |                          |                           |
| H,0,-1.3610779856,2.0468248115,-1.9288968617  |                     |                          |                           |
| H,0,-2.9025905875,1.3480820545,-0.0193192284  |                     |                          |                           |
| H,0,-2.2487173401,1.2907057501,2.2364124307   |                     |                          |                           |
| H,0,-0.5653070433,0.9930804737,1.8241934162   |                     |                          |                           |
| H,0,-1.9472590425,3.71823675,1.6076096337     |                     |                          |                           |
| H,0,-0.8185864625,3.2362720114,2.8729232906   |                     |                          |                           |
| H,0,0.2795676423,4.5748559436,0.9778118077    |                     |                          |                           |
| H,0,1.0136898488,2.9972537591,1.2285161698    |                     |                          |                           |
| H,0,-2.538311011,-3.4109768286,-1.8585186887  |                     |                          |                           |
| H,0,-1.4317507758,-2.0272982588,-1.9130039556 |                     |                          |                           |
| H,0,-1.262967723,-3.2529456031,-0.6340202346  |                     |                          |                           |
| H,0,-4.5452020588,-1.781980718,-1.8057226509  |                     |                          |                           |
| H,0,-4.6299337743,-0.5412220456,-0.5386069675 |                     |                          |                           |
| H,0,-3.4343875657,-0.4008821698,-1.8477104962 |                     |                          |                           |
| H,0,-4.2661063957,-3.5529100128,0.0932778938  |                     |                          |                           |
| H,0,-2.9370440115,-3.371022588,1.2570589686   |                     |                          |                           |
| H,0,-4.3177368096,-2.2508891129,1.2998646208  |                     |                          |                           |
| H,0,0.2826547845,-0.6156918063,0.0019176404   |                     |                          |                           |
| N,0,1.2429279436,-0.9309787926,0.2167117833   |                     |                          |                           |
| C,0,1.4412849905,-1.719709888,1.4368607015    |                     |                          |                           |
| C,0,2.853101417,-1.4852815857,1.9618802216    |                     |                          |                           |
| H,0,0.6832260283,-1.4091103383,2.1596347124   |                     |                          |                           |
| H,0,1.2778197603,-2.7821716782,1.2143090513   |                     |                          |                           |
| C,0,2.2226355541,-0.5787857101,-0.6052038884  |                     |                          |                           |
| N,0,3.4856338921,-0.9429671001,-0.3714843532  |                     |                          |                           |
| C,0,4.6001465386,-0.6320198143,-1.2707511094  |                     |                          |                           |
| C,0,3.8570325641,-1.7103653423,0.8368825577   |                     |                          |                           |
| H,0,5.1552963942,-1.5531138593,-1.4745951331  |                     |                          |                           |
| H,0,4.2493296788,-0.2250759688,-2.2158842398  |                     |                          |                           |
| H,0,5.2740535166,0.089267571,-0.7963121574    |                     |                          |                           |
| H,0,3.9229356727,-2.7731842962,0.5683021012   |                     |                          |                           |
| C,0,1.8604828895,0.2419331764,-1.8086507714   |                     |                          |                           |
| H,0,2.9423397638,-0.461287884,2.3434523895    |                     |                          |                           |
| H,0,3.0697492173,-2.1715340164,2.7858782078   |                     |                          |                           |
| H,0,4.8555251748,-1.3789748777,1.137728827    |                     |                          |                           |
| H,0,2.4471295697,1.1638773304,-1.8405040089   |                     |                          |                           |
| H,0,2.0499086728,-0.3209354511,-2.728499553   |                     |                          |                           |
| H,0,0.8078980552,0.5252127974,-1.7640292623   |                     |                          |                           |

## Ts 2 from equatorial attack with DBU model, orientation A – 6-31G\* - Gas Phase

E(RB+HF-LYP) = -962.817227828

|                                          |                             |
|------------------------------------------|-----------------------------|
| Zero-point correction=                   | 0.451567 (Hartree/Particle) |
| Thermal correction to Energy=            | 0.475682                    |
| Thermal correction to Enthalpy=          | 0.476626                    |
| Thermal correction to Gibbs Free Energy= | 0.396366                    |

|                                              |             |
|----------------------------------------------|-------------|
| Sum of electronic and zero-point Energies=   | -962.365661 |
| Sum of electronic and thermal Energies=      | -962.341546 |
| Sum of electronic and thermal Enthalpies=    | -962.340602 |
| Sum of electronic and thermal Free Energies= | -962.420862 |

|                                               | E (Thermal)<br>KCal/Mol | CV<br>Cal/Mol-Kelvin | S<br>Cal/Mol-Kelvin |
|-----------------------------------------------|-------------------------|----------------------|---------------------|
| Total                                         | 298.495                 | 89.834               | 168.922             |
| C,0,-1.8952414633,2.1669400939,1.1998947083   |                         |                      |                     |
| C,0,-0.8106549999,3.1771710791,1.5983296256   |                         |                      |                     |
| C,0,0.551392101,2.7939056888,1.0102083156     |                         |                      |                     |
| C,0,0.5094444451,2.6972555335,-0.5225907402   |                         |                      |                     |
| C,0,-0.7451990484,2.3489948311,-1.1010635851  |                         |                      |                     |
| C,0,-1.8265021753,1.7644465246,-0.2881039186  |                         |                      |                     |
| O,0,1.5515080986,2.9368227083,-1.1736243883   |                         |                      |                     |
| O,0,-1.3108685129,0.4296713668,-0.4987897508  |                         |                      |                     |
| O,0,-2.066289533,-0.8690764561,0.5161293092   |                         |                      |                     |
| C,0,-2.8866279322,-1.7006592434,-0.2676903618 |                         |                      |                     |
| C,0,-4.0567133253,-0.9158007951,-0.88855809   |                         |                      |                     |
| C,0,-2.0782263304,-2.4087689185,-1.3725506139 |                         |                      |                     |
| C,0,-3.4344527696,-2.7451339373,0.7320149567  |                         |                      |                     |
| H,0,-0.8319757044,2.3376224221,-2.1828364596  |                         |                      |                     |
| H,0,-2.8137638715,1.8247843057,-0.7588742873  |                         |                      |                     |
| H,0,-2.8860254776,2.585943558,1.4151708735    |                         |                      |                     |
| H,0,-1.8167434985,1.2472551114,1.7895261953   |                         |                      |                     |
| H,0,-1.0825556356,4.1720133072,1.2211420961   |                         |                      |                     |
| H,0,-0.7560084484,3.2617747815,2.6920995922   |                         |                      |                     |
| H,0,1.3306651552,3.5196354732,1.2685277822    |                         |                      |                     |
| H,0,0.8751088647,1.8244303228,1.4226344705    |                         |                      |                     |
| H,0,-2.6987881451,-3.1084459917,-1.9464011322 |                         |                      |                     |
| H,0,-1.6653160291,-1.6677099134,-2.064289371  |                         |                      |                     |
| H,0,-1.2463710217,-2.9718696412,-0.9315425063 |                         |                      |                     |
| H,0,-4.7525922376,-1.5784759035,-1.418637708  |                         |                      |                     |
| H,0,-4.6111232351,-0.3866156242,-0.105617772  |                         |                      |                     |
| H,0,-3.6779459693,-0.176966152,-1.601661616   |                         |                      |                     |
| H,0,-4.0948901309,-3.4628525806,0.2288652438  |                         |                      |                     |
| H,0,-2.6099925127,-3.2988700846,1.1949519574  |                         |                      |                     |
| H,0,-4.0005088733,-2.2473690409,1.5262242121  |                         |                      |                     |
| H,0,0.0586294556,-0.3540328851,-0.0702635879  |                         |                      |                     |
| N,0,0.9549155608,-0.8251340275,0.2047634285   |                         |                      |                     |
| C,0,0.991214518,-1.4342129652,1.5321649779    |                         |                      |                     |
| C,0,2.3988986134,-1.3224527051,2.106003263    |                         |                      |                     |
| H,0,0.2461407908,-0.9228207578,2.1440388376   |                         |                      |                     |
| H,0,0.6733748,-2.4810785461,1.4514694294      |                         |                      |                     |
| C,0,1.9964514616,-0.6955225235,-0.5907124744  |                         |                      |                     |
| N,0,3.217795314,-1.1243456072,-0.2190594181   |                         |                      |                     |
| C,0,4.3757414988,-1.049314055,-1.1081030739   |                         |                      |                     |
| C,0,3.4142389143,-1.8063473854,1.0713240804   |                         |                      |                     |
| H,0,4.50805763,-1.9772533146,-1.6797743329    |                         |                      |                     |
| H,0,4.280126928,-0.2120054499,-1.7979081163   |                         |                      |                     |
| H,0,5.2705106817,-0.8860594633,-0.5015867152  |                         |                      |                     |
| H,0,3.3358869425,-2.8930239393,0.9252985119   |                         |                      |                     |
| C,0,1.7799801628,-0.048738598,-1.9269479328   |                         |                      |                     |
| H,0,2.612579345,-0.2794869806,2.3661620053    |                         |                      |                     |
| H,0,2.4924631294,-1.9200504632,3.0179559135   |                         |                      |                     |
| H,0,4.434208495,-1.5934793238,1.4049918691    |                         |                      |                     |
| H,0,2.1363694754,0.9916672754,-1.911024793    |                         |                      |                     |
| H,0,2.2749065836,-0.6107717628,-2.7230266817  |                         |                      |                     |
| H,0,0.7093339441,0.0005520061,-2.1269781647   |                         |                      |                     |

## Ts 2 from equatorial attack with DBU model, orientation A – 6-31+G\*\* - Gas Phase

E(RB+HF-LYP) = -962.895307237

|                                              |                             |
|----------------------------------------------|-----------------------------|
| Zero-point correction=                       | 0.448226 (Hartree/Particle) |
| Thermal correction to Energy=                | 0.472643                    |
| Thermal correction to Enthalpy=              | 0.473587                    |
| Thermal correction to Gibbs Free Energy=     | 0.392450                    |
| Sum of electronic and zero-point Energies=   | -962.447082                 |
| Sum of electronic and thermal Energies=      | -962.422664                 |
| Sum of electronic and thermal Enthalpies=    | -962.421720                 |
| Sum of electronic and thermal Free Energies= | -962.502858                 |

|       | E (Thermal)<br>KCal/Mol | CV<br>Cal/Mol-Kelvin | S<br>Cal/Mol-Kelvin |
|-------|-------------------------|----------------------|---------------------|
| Total | 296.588                 | 90.580               | 170.768             |

C,0,-1.8254779288,2.1220426276,1.2840550558  
 C,0,-0.7584424513,3.1672421656,1.6379261983  
 C,0,0.5939944115,2.8177587155,1.0050604859  
 C,0,0.5037886119,2.6876329924,-0.5197746636  
 C,0,-0.7642174627,2.3206449993,-1.0593579359  
 C,0,-1.823758633,1.7418851345,-0.2109488136  
 O,0,1.5225222066,2.9254428052,-1.2128505606  
 O,0,-1.3198399745,0.4102197074,-0.4649448413  
 O,0,-2.1267876269,-0.9219743841,0.5062436494  
 C,0,-2.9420721607,-1.717704708,-0.3243563102  
 C,0,-4.0857653233,-0.8951053658,-0.9478876864  
 C,0,-2.1178839351,-2.4023965514,-1.4336975628  
 C,0,-3.5324057825,-2.7892211478,0.6223754878  
 H,0,-0.8881872389,2.3115593704,-2.1370260855  
 H,0,-2.8262820468,1.8172058879,-0.6445647641  
 H,0,-2.8184147203,2.493397602,1.562842493  
 H,0,-1.6726227028,1.1998865544,1.8552375658  
 H,0,-1.0711657884,4.1527507998,1.2692328009  
 H,0,-0.6650481386,3.2557648858,2.7281753765  
 H,0,1.3563359265,3.5740554566,1.2204996041  
 H,0,0.9664648347,1.8676790004,1.4186858536  
 H,0,-2.7400298862,-3.0683041298,-2.0437575816  
 H,0,-1.6759156175,-1.6469481907,-2.0903382952  
 H,0,-1.3093514642,-2.996471026,-0.9921266881  
 H,0,-4.7711618942,-1.5325466086,-1.5195059992  
 H,0,-4.6568343724,-0.3890768414,-0.1623735791  
 H,0,-3.6794621593,-0.1372404629,-1.623983991  
 H,0,-4.192007174,-3.4708698647,0.0709815304  
 H,0,-2.7304819785,-3.3769909875,1.0809983974  
 H,0,-4.1098418433,-2.3127384416,1.420491088  
 H,0,0.0649261232,-0.3574939599,-0.054915081  
 N,0,0.9731031126,-0.8044958911,0.2277180523  
 C,0,1.040520794,-1.3481269918,1.583257268  
 C,0,2.4566641653,-1.199443309,2.1285000771  
 H,0,0.3044879239,-0.8130949972,2.1860885165  
 H,0,0.7293755911,-2.3994698671,1.5603753932  
 C,0,2.0019445142,-0.7061064691,-0.5896345588  
 N,0,3.2314417583,-1.1128292429,-0.2186567051  
 C,0,4.3864634529,-1.0743690529,-1.1145950196  
 C,0,3.4574224697,-1.726175084,1.1017793893  
 H,0,4.6199283689,-2.0754758737,-1.4986132519  
 H,0,4.208935209,-0.402678217,-1.9508765977  
 H,0,5.2529429432,-0.7022914932,-0.5607858522  
 H,0,3.3862558207,-2.8190109661,1.0097277328  
 C,0,1.760582301,-0.1259789465,-1.952536941  
 H,0,2.6681637671,-0.1449044305,2.3372832626  
 H,0,2.5665344245,-1.7528265125,3.0655949716

H,0,4.4813546873,-1.4882493817,1.4040970295  
 H,0,2.1860473818,0.8829175299,-2.0214745698  
 H,0,2.1802322978,-0.7683969812,-2.7307100724  
 H,0,0.6877085287,-0.0238409966,-2.1112614383

## Ts 2 from equatorial attack with DBU model, orientation A – 6-31G\* - PCM Dichloroethane

E(RB+HF-LYP) = -962.839963975

|                                              |                             |
|----------------------------------------------|-----------------------------|
| Zero-point correction=                       | 0.451435 (Hartree/Particle) |
| Thermal correction to Energy=                | 0.475547                    |
| Thermal correction to Enthalpy=              | 0.476491                    |
| Thermal correction to Gibbs Free Energy=     | 0.395510                    |
| Sum of electronic and zero-point Energies=   | -962.388529                 |
| Sum of electronic and thermal Energies=      | -962.364417                 |
| Sum of electronic and thermal Enthalpies=    | -962.363473                 |
| Sum of electronic and thermal Free Energies= | -962.444454                 |

|       | E (Thermal) | CV             | S              |
|-------|-------------|----------------|----------------|
|       | KCal/Mol    | Cal/Mol-Kelvin | Cal/Mol-Kelvin |
| Total | 298.410     | 89.687         | 170.439        |

C,0,1.8041705643,-0.7206185053,1.7980343713  
 C,0,2.1634678475,-2.2023518419,1.9539588278  
 C,0,1.9723700102,-2.9445778442,0.6263654629  
 C,0,2.8314174841,-2.3360677244,-0.4938889717  
 C,0,3.132867207,-0.9637235994,-0.3859895525  
 C,0,2.5024839857,-0.0507430325,0.5903757344  
 O,0,3.2698708985,-3.098717361,-1.3980905648  
 O,0,1.5535925656,0.5089894681,-0.3433123403  
 O,0,0.6476494729,1.7412864529,0.3773459034  
 C,0,0.8740061571,2.9579204725,-0.339665201  
 C,0,2.3485413931,3.372353504,-0.2283114002  
 C,0,0.4588582347,2.8180291154,-1.8127588892  
 C,0,-0.0203918882,3.9874837018,0.3766766941  
 H,0,3.7876594526,-0.5243494896,-1.1358833232  
 H,0,3.167009952,0.7593895118,0.9211199084  
 H,0,2.0398744147,-0.1709488969,2.7177825409  
 H,0,0.7217809108,-0.6281526075,1.6497366731  
 H,0,3.2118630217,-2.2999435605,2.2685303972  
 H,0,1.5534929082,-2.6539423858,2.7487486929  
 H,0,2.2452254766,-4.00368079,0.7103908811  
 H,0,0.9101424628,-2.9170561397,0.3350925713  
 H,0,0.606614825,3.7605904794,-2.3531256312  
 H,0,1.0547187909,2.0405027572,-2.2984045473  
 H,0,-0.6005241894,2.5456966218,-1.8927180692  
 H,0,2.5199253,4.3430962551,-0.7084228145  
 H,0,2.6422540376,3.4513005921,0.8242939576  
 H,0,2.9875712939,2.628686657,-0.7122476461  
 H,0,0.1009486057,4.9786372136,-0.0764697971  
 H,0,-1.0777216718,3.7085757198,0.3025485839  
 H,0,0.2461681091,4.0567395766,1.4366880081  
 H,0,-0.8281133105,0.8627856619,0.1676722027  
 N,0,-1.7740489855,0.4259899229,0.2258368017  
 C,0,-2.6888127026,0.9775572028,1.2276136229  
 C,0,-3.6543680969,-0.1123949332,1.6798776252  
 H,0,-2.0805884688,1.3507953947,2.0559094712  
 H,0,-3.2345193435,1.82819734,0.7978791629  
 C,0,-2.0952738933,-0.5634417744,-0.5928205532  
 N,0,-3.3036325492,-1.1325178229,-0.5526541355  
 C,0,-3.7348634838,-2.1732600112,-1.4879970254  
 C,0,-4.3101880061,-0.7491004526,0.4590487347  
 H,0,-3.7282229266,-3.1554219542,-1.0007842103

H,0,-4.7562124727,-1.9475448794,-1.8100801344  
H,0,-3.0976318608,-2.2027654677,-2.3696872522  
H,0,-5.0314525772,-0.065702579,-0.0084325675  
C,0,-1.0543876977,-1.0244039515,-1.5739103554  
H,0,-3.1115988173,-0.8739453193,2.2521911089  
H,0,-4.4275104521,0.3079773775,2.3302445098  
H,0,-4.8489695821,-1.6595524695,0.7417919034  
H,0,-0.9780039462,-2.1154316837,-1.5773501944  
H,0,-1.3192000237,-0.7014312027,-2.5879147519  
H,0,-0.0794953635,-0.6058368694,-1.3085770324

## Ts 2 from equatorial attack with DBU model, orientation A – 6-31+G\*\* - PCM Dichloroethane

E(RB+HF-LYP) = -962.923161942

|                                              |                             |
|----------------------------------------------|-----------------------------|
| Zero-point correction=                       | 0.448142 (Hartree/Particle) |
| Thermal correction to Energy=                | 0.471463                    |
| Thermal correction to Enthalpy=              | 0.472407                    |
| Thermal correction to Gibbs Free Energy=     | 0.395039                    |
| Sum of electronic and zero-point Energies=   | -962.475019                 |
| Sum of electronic and thermal Energies=      | -962.451699                 |
| Sum of electronic and thermal Enthalpies=    | -962.450755                 |
| Sum of electronic and thermal Free Energies= | -962.528123                 |

|       | E (Thermal) | CV             | S              |
|-------|-------------|----------------|----------------|
|       | KCal/Mol    | Cal/Mol-Kelvin | Cal/Mol-Kelvin |
| Total | 295.847     | 88.356         | 162.833        |

C,0,1.9750592429,-0.7414562077,1.8710084104  
C,0,2.0074427781,-2.2766127118,1.9158186915  
C,0,1.6804438312,-2.8870475805,0.5457839951  
C,0,2.6695579863,-2.414212843,-0.5212823355  
C,0,3.1755783345,-1.1063248201,-0.3843365515  
C,0,2.6229361571,-0.1466702975,0.6004873228  
O,0,3.022202259,-3.2267956445,-1.4324093106  
O,0,1.6541028846,0.3663808991,-0.3340145108  
O,0,0.723196085,1.6590112391,0.3576921014  
C,0,0.9954068469,2.8741550089,-0.3464491858  
C,0,2.4731426168,3.2653094644,-0.193139282  
C,0,0.6216182456,2.7482144207,-1.8331208477  
C,0,0.1013804388,3.9256765466,0.3417379166  
H,0,3.8892778162,-0.739175497,-1.1183809299  
H,0,3.3272132661,0.6550820833,0.854446085  
H,0,2.4728446191,-0.3337276744,2.7593066564  
H,0,0.9399148521,-0.3854970926,1.9055181829  
H,0,3.008049361,-2.6157196753,2.2156528603  
H,0,1.3096587832,-2.6442311731,2.6796913037  
H,0,1.7142188193,-3.9819480336,0.5755899953  
H,0,0.661386653,-2.6049490235,0.2433774589  
H,0,0.8072486246,3.6896377937,-2.3627045506  
H,0,1.2140196257,1.9604261212,-2.3059188941  
H,0,-0.4402373919,2.5015789955,-1.9461309466  
H,0,2.6663323633,4.2389044641,-0.6578775883  
H,0,2.7418511453,3.3291096122,0.8665481416  
H,0,3.1160467046,2.522049479,-0.6721295612  
H,0,0.2499037139,4.9086139639,-0.1204531657  
H,0,-0.9574848689,3.6628823013,0.2467672514  
H,0,0.3472563162,4.0022555913,1.4056638903  
H,0,-0.7909597359,0.8871414622,0.2244899388  
N,0,-1.7507361726,0.4737749744,0.2945458831  
C,0,-2.6089693513,0.9618108119,1.3775588676  
C,0,-3.6114359236,-0.1225664009,1.7577165626  
H,0,-1.9636818429,1.2281062625,2.2189383736

H,0,-3.1291600337,1.8720801636,1.0510615819  
 C,0,-2.1412667308,-0.4221086509,-0.5994189582  
 N,0,-3.3680188099,-0.9530957134,-0.5645844388  
 C,0,-3.8742642239,-1.8891477478,-1.5719827358  
 C,0,-4.3294848735,-0.613734383,0.505871858  
 H,0,-3.9318054876,-2.901738758,-1.1568923914  
 H,0,-4.8789746344,-1.5719794177,-1.8672937549  
 H,0,-3.2454574528,-1.8988771681,-2.4589907907  
 H,0,-5.0248418578,0.1447910379,0.1224039531  
 C,0,-1.1564228847,-0.8203690266,-1.6621501577  
 H,0,-3.0938858448,-0.9583070011,2.2423254469  
 H,0,-4.3452491023,0.2697625417,2.4679801894  
 H,0,-4.9076550544,-1.5178365547,0.721943045  
 H,0,-1.0951612123,-1.9079481195,-1.7529504983  
 H,0,-1.4638953376,-0.4172226535,-2.6336293259  
 H,0,-0.1658326999,-0.4362843053,-1.4128497296

### Ts 1 from equatorial attack with DBU model, orientation B (13) – 6-31G\* - Gas Phase

E(RB+HF-LYP) = -962.822351428

|                                              |                             |
|----------------------------------------------|-----------------------------|
| Zero-point correction=                       | 0.452736 (Hartree/Particle) |
| Thermal correction to Energy=                | 0.476433                    |
| Thermal correction to Enthalpy=              | 0.477377                    |
| Thermal correction to Gibbs Free Energy=     | 0.399388                    |
| Sum of electronic and zero-point Energies=   | -962.369615                 |
| Sum of electronic and thermal Energies=      | -962.345919                 |
| Sum of electronic and thermal Enthalpies=    | -962.344975                 |
| Sum of electronic and thermal Free Energies= | -962.422964                 |

|       | E (Thermal) | CV             | S              |
|-------|-------------|----------------|----------------|
|       | KCal/Mol    | Cal/Mol-Kelvin | Cal/Mol-Kelvin |
| Total | 298.966     | 89.369         | 164.142        |

C,0,-1.0931994859,2.6175580956,0.5763299367  
 C,0,0.1495416323,3.2516783959,1.2157954765  
 C,0,1.3526998311,2.3106900573,1.1120731463  
 C,0,1.6339257367,1.8817153249,-0.3368523392  
 C,0,0.5504161022,1.9567290998,-1.2446136626  
 C,0,-0.7976352932,2.0440653178,-0.8085490202  
 O,0,2.7955629837,1.492770691,-0.6272204474  
 O,0,-1.290000885,0.339546881,-0.7471821452  
 O,0,-2.4230535817,-0.0324726631,0.1159883567  
 C,0,-3.550308931,-0.4584983955,-0.6800206473  
 C,0,-4.0244248365,0.6765554018,-1.5948748066  
 C,0,-3.1775823075,-1.7048511137,-1.4930867487  
 C,0,-4.6082972935,-0.786116102,0.3816761163  
 H,0,0.7549556574,1.7561713783,-2.2941345798  
 H,0,-1.5252760722,2.3248055451,-1.5672505642  
 H,0,-1.8948996868,3.362922775,0.4967755902  
 H,0,-1.4904153712,1.8217732092,1.2162670297  
 H,0,0.3900997843,4.1867425302,0.6940106276  
 H,0,-0.0577230856,3.5147897032,2.2620946431  
 H,0,2.2688954376,2.7708404509,1.5005475571  
 H,0,1.174808564,1.412097482,1.7257462339  
 H,0,-4.0310565029,-2.0602015884,-2.0821360328  
 H,0,-2.3556909828,-1.4712538552,-2.1750727447  
 H,0,-2.8589986519,-2.5151476329,-0.8268826516  
 H,0,-4.9288080055,0.3825864672,-2.1404889451  
 H,0,-4.2526345451,1.5716290877,-1.0060455239  
 H,0,-3.2478447932,0.9266552127,-2.3222784228  
 H,0,-5.5316977856,-1.1353322229,-0.0935838387  
 H,0,-4.2496948204,-1.5717565529,1.055672384

H,0,-4.8405836804,0.1011425774,0.9799660856  
 H,0,-0.0309321385,-0.7322626511,-0.5639772122  
 N,0,0.8730425882,-1.256328243,-0.3996191203  
 C,0,1.8270057769,-1.2756243984,-1.5157511441  
 C,0,3.0624395052,-2.0817965882,-1.1321520388  
 H,0,1.3119687711,-1.7070901731,-2.3797647076  
 H,0,2.1149215038,-0.2407780266,-1.7321714449  
 C,0,1.1960668257,-1.4740131747,0.8581986151  
 N,0,2.4547093982,-1.7709954409,1.2237284817  
 C,0,2.8597861135,-1.9322657159,2.6151654321  
 C,0,3.5427094416,-1.6077821492,0.2374656323  
 H,0,3.6290650568,-2.7084107203,2.6729981687  
 H,0,3.2771385039,-0.9990426483,3.0155626491  
 H,0,2.0194002746,-2.23885562,3.2365130575  
 H,0,3.8172415377,-0.5458690814,0.1936501355  
 C,0,0.0886532956,-1.4095099521,1.8770004418  
 H,0,2.8432252508,-3.1563003099,-1.0991588562  
 H,0,3.8504539706,-1.9220924005,-1.8743242024  
 H,0,4.3950862622,-2.1963324198,0.5888410537  
 H,0,-0.0514832752,-2.3896594651,2.3476042775  
 H,0,0.3230080618,-0.6869852777,2.6647810392  
 H,0,-0.8476379599,-1.1134838771,1.3979612142

### Ts 1 from equatorial attack with DBU model, orientation B (13) – 6-31+G\*\* - Gas Phase

E(RB+HF-LYP) = -962.899268353

|                                              |                             |
|----------------------------------------------|-----------------------------|
| Zero-point correction=                       | 0.449324 (Hartree/Particle) |
| Thermal correction to Energy=                | 0.473332                    |
| Thermal correction to Enthalpy=              | 0.474276                    |
| Thermal correction to Gibbs Free Energy=     | 0.395293                    |
| Sum of electronic and zero-point Energies=   | -962.449944                 |
| Sum of electronic and thermal Energies=      | -962.425937                 |
| Sum of electronic and thermal Enthalpies=    | -962.424992                 |
| Sum of electronic and thermal Free Energies= | -962.503975                 |

|       | E (Thermal) | CV             | S              |
|-------|-------------|----------------|----------------|
|       | KCal/Mol    | Cal/Mol-Kelvin | Cal/Mol-Kelvin |
| Total | 297.020     | 90.209         | 166.234        |

C,0,-1.1158607751,2.6421485486,0.6220762618  
 C,0,0.1201551086,3.3089971598,1.2416202586  
 C,0,1.3372185963,2.3828645982,1.1543942281  
 C,0,1.6143059564,1.9056678152,-0.2783784046  
 C,0,0.532037638,1.9492060323,-1.1897435164  
 C,0,-0.8203296433,2.0463054165,-0.7536092854  
 O,0,2.7795009898,1.5053677357,-0.5555128255  
 O,0,-1.2855285904,0.3509017478,-0.660532695  
 O,0,-2.4807809168,-0.0202058828,0.123295798  
 C,0,-3.5573358923,-0.459291923,-0.7397723916  
 C,0,-3.9760663944,0.6589619489,-1.7017372144  
 C,0,-3.1400426476,-1.7204696603,-1.5079245588  
 C,0,-4.6804292194,-0.7703939273,0.2590233314  
 H,0,0.7357108754,1.7325423484,-2.2355348595  
 H,0,-1.5445261443,2.3152082535,-1.5194754991  
 H,0,-1.9331112202,3.3683134388,0.5359003768  
 H,0,-1.4889606835,1.8496813629,1.2806056118  
 H,0,0.3450213554,4.2378275369,0.7027995108  
 H,0,-0.0864183195,3.5865457386,2.2837669503  
 H,0,2.2495460523,2.871046711,1.5149915205  
 H,0,1.1817403975,1.5025622931,1.7980122099  
 H,0,-3.9663427431,-2.0885230676,-2.1263219794  
 H,0,-2.2908696252,-1.5014886285,-2.1603687425

H,0,-2.8514895708,-2.5153018091,-0.8113983944  
H,0,-4.8475211378,0.3506202789,-2.2900531192  
H,0,-4.2385573291,1.5647827771,-1.1458689994  
H,0,-3.1621817114,0.8946797355,-2.3918965437  
H,0,-5.5688313954,-1.1290111939,-0.2715187208  
H,0,-4.3657808091,-1.5437729977,0.9670336928  
H,0,-4.9524132936,0.126399053,0.8242153288  
H,0,-0.0468616877,-0.7459007233,-0.4926207316  
N,0,0.8568878283,-1.2753312745,-0.3622687093  
C,0,1.7580908057,-1.3191939998,-1.5196280964  
C,0,2.9908235623,-2.1530982074,-1.1907792817  
H,0,1.1962940233,-1.7412391264,-2.3580126574  
H,0,2.0504202587,-0.2907018184,-1.7572155847  
C,0,1.2384530817,-1.4782011972,0.8824871104  
N,0,2.5065863636,-1.7976563436,1.19226316  
C,0,2.977901764,-1.918453932,2.569292375  
C,0,3.5518338514,-1.6926557439,0.1521138158  
H,0,3.7484480566,-2.6930239794,2.6114259693  
H,0,3.4129591421,-0.9737637483,2.9193180678  
H,0,2.1698707478,-2.207452603,3.2391773686  
H,0,3.8777425432,-0.6464093619,0.0891120576  
C,0,0.1848490556,-1.3680880042,1.9520018188  
H,0,2.7444019736,-3.2209750468,-1.1461490679  
H,0,3.7461417638,-2.0153814727,-1.9697248318  
H,0,4.3907483636,-2.3189131047,0.4674579299  
H,0,0.0254605988,-2.3413264254,2.4287236495  
H,0,0.482961718,-0.6548055551,2.725068837  
H,0,-0.7570824905,-1.0356438902,1.5119685717

### Ts 1 from equatorial attack with DBU model, orientation B (13) – 6-31G\* - PCM Dichloroethane

E(RB+HF-LYP) = -962.840339467

|                                              |                             |
|----------------------------------------------|-----------------------------|
| Zero-point correction=                       | 0.451312 (Hartree/Particle) |
| Thermal correction to Energy=                | 0.475419                    |
| Thermal correction to Enthalpy=              | 0.476364                    |
| Thermal correction to Gibbs Free Energy=     | 0.396232                    |
| Sum of electronic and zero-point Energies=   | -962.389027                 |
| Sum of electronic and thermal Energies=      | -962.364920                 |
| Sum of electronic and thermal Enthalpies=    | -962.363976                 |
| Sum of electronic and thermal Free Energies= | -962.444108                 |

|       | E (Thermal) | CV             | S              |
|-------|-------------|----------------|----------------|
|       | KCal/Mol    | Cal/Mol-Kelvin | Cal/Mol-Kelvin |
| Total | 298.330     | 89.747         | 168.652        |

C,0,-2.201252939,1.9927560183,1.0417629329  
C,0,-1.290776939,3.0558640183,1.6751729329  
C,0,0.155578061,2.9045840183,1.1913719329  
C,0,0.251519061,2.9738450183,-0.3377940671  
C,0,-0.860000939,2.4659560183,-1.0627710671  
C,0,-1.916697939,1.7834300183,-0.4371730671  
O,0,1.285370061,3.4597530183,-0.8621630671  
O,0,-1.371731939,-0.0335259817,-0.5272710671  
O,0,-1.964214939,-0.9671109817,0.4290399329  
C,0,-2.830029939,-1.9079299817,-0.2461490671  
C,0,-3.979747939,-1.1722509817,-0.9446480671  
C,0,-2.018292939,-2.7404429817,-1.2465330671  
C,0,-3.355258939,-2.7783709817,0.9019659329  
H,0,-0.804687939,2.4956110183,-2.1504550671  
H,0,-2.794725939,1.5831460183,-1.0452700671  
H,0,-3.253074939,2.2862750183,1.1630369329  
H,0,-2.099394939,1.0315060183,1.5578449329

H,0,-1.649001939,4.0561010183,1.3951119329  
 H,0,-1.346601939,2.9964510183,2.7702509329  
 H,0,0.809476061,3.6796030183,1.6085499329  
 H,0,0.559202061,1.9349750183,1.5223629329  
 H,0,-2.656985939,-3.4659839817,-1.7635110671  
 H,0,-1.560360939,-2.0815229817,-1.9889840671  
 H,0,-1.221497939,-3.2899079817,-0.7318160671  
 H,0,-4.674924939,-1.8857569817,-1.4025450671  
 H,0,-4.536263939,-0.5619119817,-0.2245940671  
 H,0,-3.589705939,-0.5172419817,-1.7280700671  
 H,0,-4.036983939,-3.5452599817,0.5177799329  
 H,0,-2.529152939,-3.2804769817,1.4174459329  
 H,0,-3.897499939,-2.1676119817,1.6318389329  
 H,0,0.237688061,-0.2543779817,-0.3939090671  
 N,0,1.290430061,-0.4072919817,-0.4333380671  
 C,0,1.990199061,0.1664650183,-1.5868440671  
 C,0,3.277089061,-0.6113319817,-1.8387350671  
 H,0,1.307142061,0.1039410183,-2.4390020671  
 H,0,2.180358061,1.2299400183,-1.3985770671  
 C,0,1.896288061,-1.0474179817,0.5459719329  
 N,0,3.226499061,-1.2176169817,0.5605759329  
 C,0,3.951715061,-1.8630359817,1.6534629329  
 C,0,4.072809061,-0.7214699817,-0.5418180671  
 H,0,4.357604061,-2.8272959817,1.3248869329  
 H,0,4.784087061,-1.2189709817,1.9572689329  
 H,0,3.309780061,-2.0221879817,2.5174029329  
 H,0,4.495531061,0.2500820183,-0.2520340671  
 C,0,1.039347061,-1.5862769817,1.6600479329  
 H,0,3.041112061,-1.6151209817,-2.2123160671  
 H,0,3.884828061,-0.1072619817,-2.5967020671  
 H,0,4.904223061,-1.4249099817,-0.6563500671  
 H,0,1.246544061,-2.6476349817,1.8299799329  
 H,0,1.241243061,-1.0496579817,2.5944109329  
 H,0,-0.016759939,-1.4693369817,1.4047069329

### Ts 1 from equatorial attack with DBU model, orientation B (13) – 6-31+G\*\* - PCM Dichloroethane

E(RB+HF-LYP) = -962.922154717

|                                              |                             |
|----------------------------------------------|-----------------------------|
| Zero-point correction=                       | 0.447644 (Hartree/Particle) |
| Thermal correction to Energy=                | 0.472059                    |
| Thermal correction to Enthalpy=              | 0.473004                    |
| Thermal correction to Gibbs Free Energy=     | 0.391163                    |
| Sum of electronic and zero-point Energies=   | -962.474510                 |
| Sum of electronic and thermal Energies=      | -962.450095                 |
| Sum of electronic and thermal Enthalpies=    | -962.449151                 |
| Sum of electronic and thermal Free Energies= | -962.530991                 |

|       | E (Thermal)<br>KCal/Mol | CV<br>Cal/Mol-Kelvin | S<br>Cal/Mol-Kelvin |
|-------|-------------------------|----------------------|---------------------|
| Total | 296.222                 | 90.495               | 172.247             |

C,0,-1.9585729512,1.9451010183,1.298284939  
 C,0,-1.0313609512,3.0786140183,1.763329939  
 C,0,0.3025490488,3.0545730183,1.006544939  
 C,0,0.0992790488,3.1051580183,-0.508045061  
 C,0,-1.0789699512,2.5023440183,-1.021103061  
 C,0,-1.9667359512,1.7741200183,-0.211242061  
 O,0,0.9731120488,3.6751950183,-1.221676061  
 O,0,-1.3720669512,-0.0427709817,-0.446951061  
 O,0,-1.9429959512,-1.0375729817,0.461752939  
 C,0,-2.8175579512,-1.9527849817,-0.244219061

C,0,-3.9890519512,-1.1969589817,-0.882864061  
 C,0,-2.0240299512,-2.7356029817,-1.298692061  
 C,0,-3.3119659512,-2.8821089817,0.871864939  
 H,0,-1.2314699512,2.5284320183,-2.099142061  
 H,0,-2.9287779512,1.5213790183,-0.645191061  
 H,0,-2.9834379512,2.1364500183,1.641274939  
 H,0,-1.6647109512,0.9940440183,1.755325939  
 H,0,-1.5174809512,4.0467890183,1.583141939  
 H,0,-0.8628469512,3.0061200183,2.845295939  
 H,0,0.9450380488,3.8947520183,1.293091939  
 H,0,0.8557340488,2.1341020183,1.247930939  
 H,0,-2.6692079512,-3.4610499817,-1.806645061  
 H,0,-1.6116529512,-2.0521609817,-2.045393061  
 H,0,-1.1966689512,-3.2792729817,-0.829763061  
 H,0,-4.6826649512,-1.8991659817,-1.358944061  
 H,0,-4.5387419512,-0.6298399817,-0.124208061  
 H,0,-3.6250499512,-0.5024129817,-1.644252061  
 H,0,-3.9871999512,-3.6391919817,0.459239939  
 H,0,-2.4716249512,-3.3953759817,1.350594939  
 H,0,-3.8536109512,-2.3149639817,1.635729939  
 H,0,0.2056720488,-0.3154989817,-0.371822061  
 N,0,1.2620130488,-0.4663149817,-0.431380061  
 C,0,1.9282500488,0.0073950183,-1.647863061  
 C,0,3.1951900488,-0.8071169817,-1.885796061  
 H,0,1.2185730488,-0.0997399817,-2.472644061  
 H,0,2.1541730488,1.0760040183,-1.546981061  
 C,0,1.9066100488,-1.0216129817,0.577334939  
 N,0,3.2373960488,-1.1876889817,0.560201939  
 C,0,3.9985390488,-1.7486639817,1.677874939  
 C,0,4.0441410488,-0.8124829817,-0.619284061  
 H,0,4.3212590488,-2.7708979817,1.448147939  
 H,0,4.8858460488,-1.1297679817,1.843076939  
 H,0,3.4137600488,-1.7554739817,2.594947939  
 H,0,4.4937550488,0.1731110183,-0.438496061  
 C,0,1.0938050488,-1.4681089817,1.761933939  
 H,0,2.9313250488,-1.8356439817,-2.159653061  
 H,0,3.7734590488,-0.3795549817,-2.710356061  
 H,0,4.8579340488,-1.5400419817,-0.702546061  
 H,0,1.3100390488,-2.5118369817,2.008167939  
 H,0,1.3267260488,-0.8581339817,2.641600939  
 H,0,0.0308900488,-1.3731179817,1.533348939

### Intermediate from equatorial attack with DBU model, orientation B (14) – 6-31G\* Gas Phase

E(RB+HF-LYP) = -962.825022182

|                                              |                             |
|----------------------------------------------|-----------------------------|
| Zero-point correction=                       | 0.453871 (Hartree/Particle) |
| Thermal correction to Energy=                | 0.477936                    |
| Thermal correction to Enthalpy=              | 0.478881                    |
| Thermal correction to Gibbs Free Energy=     | 0.399909                    |
| Sum of electronic and zero-point Energies=   | -962.371152                 |
| Sum of electronic and thermal Energies=      | -962.347086                 |
| Sum of electronic and thermal Enthalpies=    | -962.346142                 |
| Sum of electronic and thermal Free Energies= | -962.425113                 |

|       | E (Thermal) | CV             | S              |
|-------|-------------|----------------|----------------|
|       | KCal/Mol    | Cal/Mol-Kelvin | Cal/Mol-Kelvin |
| Total | 299.910     | 90.832         | 166.209        |

C,0,-1.2059963681,2.168275155,1.151531667  
 C,0,-0.0886490341,3.2080666982,1.2797434339  
 C,0,1.2380712449,2.609460379,0.8049555827  
 C,0,1.1492504175,2.0320028822,-0.6186624721

C,0,-0.1267757636,1.7643219825,-1.1231390086  
 C,0,-1.3275881902,1.62149463,-0.2860211491  
 O,0,2.2422744929,1.8645294313,-1.2467907265  
 O,0,-1.5021277071,0.1198337998,-0.2462620245  
 O,0,-2.6464801201,-0.2942783614,0.6397852561  
 C,0,-3.6331619295,-0.9995327803,-0.1377707601  
 C,0,-4.2284632022,-0.0971975953,-1.2253786733  
 C,0,-3.0266239721,-2.2723456865,-0.744798579  
 C,0,-4.6887917216,-1.3499894514,0.921243676  
 H,0,-0.2197122154,1.5069156505,-2.1766778941  
 H,0,-2.2462175835,1.9808461681,-0.7660100456  
 H,0,-2.1676503849,2.5801845547,1.4780643126  
 H,0,-0.9926501615,1.3293724447,1.8252594642  
 H,0,-0.3257589394,4.0859220298,0.6648345742  
 H,0,-0.0174048347,3.5574393213,2.3193775155  
 H,0,2.0428251417,3.3545236768,0.7968362897  
 H,0,1.5645869488,1.8215242068,1.5065673172  
 H,0,-3.7920329048,-2.8586028017,-1.266361042  
 H,0,-2.2428483318,-2.0174627698,-1.4638947675  
 H,0,-2.5896391917,-2.8991713862,0.0409248004  
 H,0,-5.0249508937,-0.6199054818,-1.76799245  
 H,0,-4.6522907719,0.8091592091,-0.7802964004  
 H,0,-3.4584072434,0.1963384211,-1.9439583912  
 H,0,-5.5146643185,-1.9058088561,0.463516465  
 H,0,-4.2519136598,-1.9672017666,1.713260002  
 H,0,-5.0926967943,-0.4398473582,1.3761713377  
 H,0,0.0666832944,-0.8307458598,-0.5142851295  
 N,0,1.0471864305,-1.1534635881,-0.5617063192  
 C,0,1.7142567137,-1.009140237,-1.8635508557  
 C,0,3.1468770285,-1.5189641009,-1.7618995169  
 H,0,1.1298582448,-1.5723383001,-2.5975963387  
 H,0,1.7272801623,0.061276339,-2.1117963763  
 C,0,1.676065161,-1.2125467793,0.5974256085  
 N,0,3.0148814555,-1.218324158,0.66986791  
 C,0,3.7333512728,-1.1997503304,1.9392659307  
 C,0,3.7974754791,-0.8778634742,-0.5384429396  
 H,0,4.6704516994,-1.7514857771,1.8215641568  
 H,0,3.96974123,-0.1718923234,2.2439003719  
 H,0,3.1529961931,-1.6791513839,2.7271597196  
 H,0,3.7999615798,0.215172304,-0.6496881526  
 C,0,0.8284161043,-1.3041599637,1.8379965077  
 H,0,3.1821951075,-2.6124796137,-1.6783381093  
 H,0,3.6987563749,-1.2318409136,-2.6619709243  
 H,0,4.8154435497,-1.2461271699,-0.383658118  
 H,0,0.9726358612,-2.2730508773,2.3296482054  
 H,0,1.0914502227,-0.5171999681,2.5507031493  
 H,0,-0.2261153515,-1.1953144221,1.5787545684

### Intermediate from equatorial attack with DBU model, orientation B (14) – 6-31+G\*\* Gas Phase

E(RB+HF-LYP) = -962.901398516

|                                              |                             |
|----------------------------------------------|-----------------------------|
| Zero-point correction=                       | 0.450583 (Hartree/Particle) |
| Thermal correction to Energy=                | 0.474948                    |
| Thermal correction to Enthalpy=              | 0.475893                    |
| Thermal correction to Gibbs Free Energy=     | 0.395875                    |
| Sum of electronic and zero-point Energies=   | -962.450816                 |
| Sum of electronic and thermal Energies=      | -962.426450                 |
| Sum of electronic and thermal Enthalpies=    | -962.425506                 |
| Sum of electronic and thermal Free Energies= | -962.505523                 |

| E (Thermal) | CV             | S              |
|-------------|----------------|----------------|
| KCal/Mol    | Cal/Mol-Kelvin | Cal/Mol-Kelvin |

Total 298.035 91.679 168.410

C,0,-1.2987294015,2.233793169,1.1614978179  
 C,0,-0.1652038071,3.2516167367,1.3306588212  
 C,0,1.1724267224,2.6291409912,0.9175928995  
 C,0,1.1384211135,2.0385656928,-0.5010153975  
 C,0,-0.1175048671,1.775398528,-1.0577744227  
 C,0,-1.349465635,1.6429113238,-0.2630001739  
 O,0,2.2581319237,1.8529794064,-1.0829085751  
 O,0,-1.5035907962,0.132694635,-0.1778829554  
 O,0,-2.7058039093,-0.2686142188,0.6316685629  
 C,0,-3.6431636513,-0.9968234407,-0.1923717179  
 C,0,-4.161668138,-0.1267086921,-1.3441000214  
 C,0,-3.0015188916,-2.2885123988,-0.7185039539  
 C,0,-4.7693119097,-1.3151593077,0.8022479814  
 H,0,-0.1714943636,1.5146491864,-2.112674842  
 H,0,-2.2499271367,1.9675523065,-0.7964398071  
 H,0,-2.265511107,2.6823898481,1.4147573102  
 H,0,-1.152637015,1.4107503646,1.8713667041  
 H,0,-0.3582104215,4.1322078298,0.7049600832  
 H,0,-0.1306469361,3.6019803775,2.3713152042  
 H,0,1.9857357956,3.3637615418,0.9347539246  
 H,0,1.4565154669,1.842890836,1.6367048385  
 H,0,-3.7357774805,-2.8883967956,-1.2673657958  
 H,0,-2.17531588,-2.0583089459,-1.3965912098  
 H,0,-2.6176568608,-2.8895229054,0.1127290304  
 H,0,-4.9210722587,-0.6686176342,-1.9187304998  
 H,0,-4.612956976,0.7922782318,-0.9572768989  
 H,0,-3.3472770894,0.1429653436,-2.0212449434  
 H,0,-5.5627620398,-1.879194539,0.3006128031  
 H,0,-4.3914228258,-1.9144296051,1.6364446151  
 H,0,-5.199703346,-0.3934155519,1.2050050396  
 H,0,0.073510279,-0.854263394,-0.4335591553  
 N,0,1.0492750792,-1.1762384339,-0.5227489135  
 C,0,1.6486086736,-1.0593259036,-1.8588398447  
 C,0,3.070723802,-1.6053275565,-1.8311950741  
 H,0,1.0134339939,-1.612577769,-2.5563780877  
 H,0,1.6622951284,0.0058720549,-2.1189494194  
 C,0,1.7431715214,-1.2087798181,0.6018516232  
 N,0,3.0825451417,-1.2410773936,0.6009071369  
 C,0,3.8702692644,-1.1802498187,1.8298781221  
 C,0,3.8135069167,-0.9730052726,-0.6573379863  
 H,0,4.7897769142,-1.7531244292,1.6854262576  
 H,0,4.1369750838,-0.1439477876,2.0716976802  
 H,0,3.3278324844,-1.6155913216,2.667571297  
 H,0,3.8743389057,0.1151765356,-0.7904818397  
 C,0,0.9647939029,-1.2397590732,1.8889798319  
 H,0,3.0760124789,-2.698241587,-1.7368911577  
 H,0,3.5781477719,-1.346084331,-2.7646748312  
 H,0,4.816237571,-1.394427057,-0.5477327636  
 H,0,1.0976294035,-2.2018863215,2.3951308524  
 H,0,1.2952433174,-0.4470188567,2.5644832754  
 H,0,-0.0960858431,-1.0953443703,1.6804974842

### Intermediate from equatorial attack with DBU model, orientation B (14) – 6-31G\* – PCM Dichloroethane

E(RB+HF-LYP) = -962.844738623

|                                          |                             |
|------------------------------------------|-----------------------------|
| Zero-point correction=                   | 0.453435 (Hartree/Particle) |
| Thermal correction to Energy=            | 0.477708                    |
| Thermal correction to Enthalpy=          | 0.478652                    |
| Thermal correction to Gibbs Free Energy= | 0.398080                    |

|                                              |             |
|----------------------------------------------|-------------|
| Sum of electronic and zero-point Energies=   | -962.391304 |
| Sum of electronic and thermal Energies=      | -962.367030 |
| Sum of electronic and thermal Enthalpies=    | -962.366086 |
| Sum of electronic and thermal Free Energies= | -962.446658 |

|       | E (Thermal)<br>KCal/Mol | CV<br>Cal/Mol-Kelvin | S<br>Cal/Mol-Kelvin |
|-------|-------------------------|----------------------|---------------------|
| Total | 299.766                 | 90.837               | 169.578             |

C,0,-1.1642170122,2.1940779024,1.1098230122  
 C,0,-0.0977960122,3.2932129024,1.1339470122  
 C,0,1.2212999878,2.7518269024,0.5748870122  
 C,0,1.0633089878,2.1388049024,-0.8259339878  
 C,0,-0.2186210122,1.7629849024,-1.2193859878  
 C,0,-1.3683950122,1.6078339024,-0.3027829878  
 O,0,2.1172259878,2.0493059024,-1.5444049878  
 O,0,-1.5278410122,0.1222549024,-0.2145859878  
 O,0,-2.6726910122,-0.2332510976,0.6738410122  
 C,0,-3.6250290122,-1.0296260976,-0.0658919878  
 C,0,-4.2103750122,-0.2356610976,-1.2393259878  
 C,0,-2.9731630122,-2.3334410976,-0.5451239878  
 C,0,-4.6976140122,-1.3133600976,0.9946620122  
 H,0,-0.3598850122,1.4196939024,-2.2447209878  
 H,0,-2.3189190122,1.9535079024,-0.7321259878  
 H,0,-2.1183820122,2.5607069024,1.5056660122  
 H,0,-0.8471960122,1.3812709024,1.7747560122  
 H,0,-0.4272660122,4.1467519024,0.5254170122  
 H,0,0.0317099878,3.6670489024,2.1592520122  
 H,0,1.9839269878,3.5383259024,0.5030960122  
 H,0,1.6343119878,1.9943499024,1.2620470122  
 H,0,-3.7157720122,-2.9839730976,-1.0210519878  
 H,0,-2.1850000122,-2.1257180976,-1.2746279878  
 H,0,-2.5332270122,-2.8736930976,0.3007090122  
 H,0,-4.9728700122,-0.8258800976,-1.7607129878  
 H,0,-4.6753900122,0.6896149024,-0.8822589878  
 H,0,-3.4257290122,0.0220279024,-1.9561219878  
 H,0,-5.4990260122,-1.9240050976,0.5645990122  
 H,0,-4.2685530122,-1.8540790976,1.8449060122  
 H,0,-5.1338570122,-0.3782480976,1.3615880122  
 H,0,0.0868799878,-0.8339340976,-0.3965069878  
 N,0,1.0673949878,-1.1378490976,-0.4544529878  
 C,0,1.6938379878,-1.0802780976,-1.7830669878  
 C,0,3.1166339878,-1.6202750976,-1.6973539878  
 H,0,1.0766989878,-1.6765940976,-2.4631889878  
 H,0,1.7018059878,-0.0332580976,-2.1092509878  
 C,0,1.7243329878,-1.2056390976,0.6917910122  
 N,0,3.0593559878,-1.2259370976,0.7264070122  
 C,0,3.8286659878,-1.3062230976,1.9670290122  
 C,0,3.8133849878,-0.9519350976,-0.5148399878  
 H,0,4.6981909878,-1.9483990976,1.8007320122  
 H,0,4.1793639878,-0.3125810976,2.2725720122  
 H,0,3.2337369878,-1.7377820976,2.7709470122  
 H,0,3.8474499878,0.1347429024,-0.6721779878  
 C,0,0.9074829878,-1.2773340976,1.9531080122  
 H,0,3.1228099878,-2.7093870976,-1.5682389878  
 H,0,3.6545519878,-1.3873270976,-2.6218289878  
 H,0,4.8289729878,-1.3308760976,-0.3756349878  
 H,0,1.0211399878,-2.2602600976,2.4249990122  
 H,0,1.2244109878,-0.5173380976,2.6735120122  
 H,0,-0.1481250122,-1.1244930976,1.7219250122

## Intermediate from equatorial attack with DBU model, orientation B (14) – 6-31+G\*\* - PCM Dichloroethane

E(RB+HF-LYP) = -962.926817039

|                                              |                             |
|----------------------------------------------|-----------------------------|
| Zero-point correction=                       | 0.449737 (Hartree/Particle) |
| Thermal correction to Energy=                | 0.473501                    |
| Thermal correction to Enthalpy=              | 0.474446                    |
| Thermal correction to Gibbs Free Energy=     | 0.394925                    |
| Sum of electronic and zero-point Energies=   | -962.477080                 |
| Sum of electronic and thermal Energies=      | -962.453316                 |
| Sum of electronic and thermal Enthalpies=    | -962.452371                 |
| Sum of electronic and thermal Free Energies= | -962.531892                 |

|       | E (Thermal) | CV             | S              |
|-------|-------------|----------------|----------------|
|       | KCal/Mol    | Cal/Mol-Kelvin | Cal/Mol-Kelvin |
| Total | 297.127     | 89.656         | 167.366        |

C,0,-1.3397017083,2.1094979925,1.2619632696  
 C,0,-0.4133704163,3.325105907,1.3588546156  
 C,0,0.9517119602,2.9996899247,0.7421696994  
 C,0,0.8426872009,2.4749083463,-0.6929303309  
 C,0,-0.3758630653,1.9414892129,-1.0997983006  
 C,0,-1.4987969016,1.6061559023,-0.1864521289  
 O,0,1.8874893316,2.5871979256,-1.4382083283  
 O,0,-1.5087649183,0.1096303062,-0.2001388042  
 O,0,-2.6115343631,-0.4142150651,0.6499317873  
 C,0,-3.4934774289,-1.2445538634,-0.1507829066  
 C,0,-4.1470705423,-0.4267231193,-1.2705653409  
 C,0,-2.7288839272,-2.4498009475,-0.7127544431  
 C,0,-4.5361154288,-1.6926819814,0.8820924347  
 H,0,-0.489315584,1.6501908196,-2.1440391511  
 H,0,-2.4801407513,1.884659166,-0.5924964719  
 H,0,-2.3222857109,2.3283847929,1.6941014337  
 H,0,-0.9144646077,1.2935970383,1.8593199451  
 H,0,-0.8571911939,4.1780855418,0.82746759  
 H,0,-0.3049786039,3.6274879518,2.4092398245  
 H,0,1.6023650834,3.8824612624,0.7196256191  
 H,0,1.4732242016,2.2503152072,1.3593315722  
 H,0,-3.4149813789,-3.123739164,-1.2373161835  
 H,0,-1.9623311289,-2.1267559718,-1.4223823435  
 H,0,-2.24783091,-3.0101447811,0.0958262219  
 H,0,-4.8539648611,-1.049600522,-1.8296130525  
 H,0,-4.693056191,0.4267730185,-0.8560923368  
 H,0,-3.3925011272,-0.0551099971,-1.9687394915  
 H,0,-5.2786579066,-2.3385930293,0.4018653623  
 H,0,-4.0627894995,-2.2545246767,1.6936089757  
 H,0,-5.0546182334,-0.8291794737,1.3103102019  
 H,0,0.1802146782,-0.6962535351,-0.4209129204  
 N,0,1.1658404576,-0.9737168813,-0.5005136878  
 C,0,1.7991971123,-0.7337277022,-1.8045485678  
 C,0,3.2010131213,-1.3322398034,-1.8114214648  
 H,0,1.171978839,-1.2083722954,-2.5664134436  
 H,0,1.7973782916,0.347662709,-1.9812219752  
 C,0,1.8087710982,-1.2568874373,0.6204278945  
 N,0,3.1418160351,-1.3506543612,0.6522160338  
 C,0,3.8975310532,-1.6542681166,1.8694755469  
 C,0,3.9336180921,-0.9496037665,-0.5296651317  
 H,0,4.7127827924,-2.3368642951,1.6155009357  
 H,0,4.3241503959,-0.7384527313,2.2958116253  
 H,0,3.2682433506,-2.1361340349,2.6151871708  
 H,0,4.1068338142,0.133658578,-0.4856062947  
 C,0,0.9797865785,-1.4845639139,1.8547410581  
 H,0,3.1492149553,-2.4248827412,-1.888603441

H,0,3.7593208134,-0.962198161,-2.676570604  
 H,0,4.9016716335,-1.4532519836,-0.4649328992  
 H,0,1.0517938085,-2.5296135888,2.174917618  
 H,0,1.3188302433,-0.8517452114,2.6795425462  
 H,0,-0.0662318529,-1.2589463314,1.6438548843

## Ts 2 from equatorial attack with DBU model, orientation B – (15) 6-31G\* - Gas Phase

E(RB+HF-LYP) = -962.818858563

|                                              |                             |
|----------------------------------------------|-----------------------------|
| Zero-point correction=                       | 0.452404 (Hartree/Particle) |
| Thermal correction to Energy=                | 0.476295                    |
| Thermal correction to Enthalpy=              | 0.477239                    |
| Thermal correction to Gibbs Free Energy=     | 0.398459                    |
| Sum of electronic and zero-point Energies=   | -962.366455                 |
| Sum of electronic and thermal Energies=      | -962.342564                 |
| Sum of electronic and thermal Enthalpies=    | -962.341620                 |
| Sum of electronic and thermal Free Energies= | -962.420399                 |

|       | E (Thermal)<br>KCal/Mol | CV<br>Cal/Mol-Kelvin | S<br>Cal/Mol-Kelvin |
|-------|-------------------------|----------------------|---------------------|
| Total | 298.879                 | 89.806               | 165.806             |

C,0,-1.7784212684,2.4891694415,0.8793995587  
 C,0,-0.5461741999,3.3014396919,1.3044072713  
 C,0,0.7590857554,2.5795378235,0.9472114063  
 C,0,0.8629425568,2.2826220247,-0.5525154573  
 C,0,-0.3703982321,2.1127656683,-1.2556528332  
 C,0,-1.6216033992,1.855341119,-0.5137854685  
 O,0,1.9922522157,2.1986288249,-1.0868802981  
 O,0,-1.2109693024,0.4891640888,-0.4738367932  
 O,0,-2.2318442746,-0.69227017,0.6178503676  
 C,0,-3.1427490038,-1.4513428374,-0.1266151337  
 C,0,-4.2280076608,-0.5581546466,-0.7619349048  
 C,0,-2.4370804859,-2.2733016816,-1.2263225302  
 C,0,-3.8021607759,-2.4114314148,0.8929407427  
 H,0,-0.344514838,1.9622977935,-2.32975375  
 H,0,-2.5295559165,1.9678982515,-1.1169012691  
 H,0,-2.6650737804,3.1353516902,0.8889292143  
 H,0,-1.9767304731,1.6657023872,1.5737251557  
 H,0,-0.5555286212,4.2717514822,0.79000828  
 H,0,-0.5859120698,3.5179184925,2.3799605154  
 H,0,1.641826316,3.1663343152,1.2260806903  
 H,0,0.8182003996,1.63122012,1.5020723998  
 H,0,-3.1409476885,-2.902726463,-1.7859594905  
 H,0,-1.9453923738,-1.5966684454,-1.9337548319  
 H,0,-1.675351184,-2.9267691318,-0.7827904282  
 H,0,-5.0151569837,-1.1509997956,-1.2454441441  
 H,0,-4.6900264231,0.0697485919,0.0080408035  
 H,0,-3.783752706,0.0972827176,-1.5183162854  
 H,0,-4.5528951198,-3.0519201537,0.4116928505  
 H,0,-3.0434586336,-3.0538099854,1.3543590757  
 H,0,-4.2903771433,-1.8369177107,1.6872353027  
 H,0,0.0864823488,-0.6862118626,-0.5954932567  
 N,0,1.0712207556,-0.993220304,-0.5839861043  
 C,0,1.8229780562,-0.7951537142,-1.8291028773  
 C,0,3.2607102375,-1.268366762,-1.6472885771  
 H,0,1.3103566215,-1.3587659884,-2.6149160705  
 H,0,1.8005449152,0.2734761056,-2.0705280552  
 C,0,1.6016375377,-1.1514593137,0.6143226306  
 N,0,2.9326720425,-1.15152492,0.7835252335  
 C,0,3.5708040253,-1.3031662974,2.086271798  
 C,0,3.7956208299,-0.709430694,-0.330764882

H,0,4.4574516542,-1.9359430726,1.9786663684  
H,0,3.883700991,-0.3296731841,2.4849889854  
H,0,2.8957186723,-1.7757110979,2.7976356012  
H,0,3.7986281442,0.3879105667,-0.3581276094  
C,0,0.6563315976,-1.3529774708,1.7658190086  
H,0,3.3182855133,-2.3634789687,-1.6339188508  
H,0,3.8745550663,-0.9103218545,-2.4791904274  
H,0,4.8081910176,-1.0674411165,-0.1260304962  
H,0,0.7813248347,-2.3611183562,2.1795754256  
H,0,0.8601605821,-0.6334741698,2.5651019922  
H,0,-0.3846052413,-1.2324521579,1.4308736775

## Ts 2 from equatorial attack with DBU model, orientation B (15) – 6-31+G\*\* - Gas Phase

E(RB+HF-LYP) = -962.896635434

|                                              |                             |
|----------------------------------------------|-----------------------------|
| Zero-point correction=                       | 0.448498 (Hartree/Particle) |
| Thermal correction to Energy=                | 0.472774                    |
| Thermal correction to Enthalpy=              | 0.473718                    |
| Thermal correction to Gibbs Free Energy=     | 0.392929                    |
| Sum of electronic and zero-point Energies=   | -962.448138                 |
| Sum of electronic and thermal Energies=      | -962.423861                 |
| Sum of electronic and thermal Enthalpies=    | -962.422917                 |
| Sum of electronic and thermal Free Energies= | -962.503707                 |

|       | E (Thermal)<br>KCal/Mol | CV<br>Cal/Mol-Kelvin | S<br>Cal/Mol-Kelvin |
|-------|-------------------------|----------------------|---------------------|
| Total | 296.670                 | 90.442               | 170.036             |

C,0,-1.8094453258,2.4324443434,0.9926855973  
C,0,-0.7133727884,3.4761568336,1.2500887743  
C,0,0.6499761371,2.9890164645,0.7442354721  
C,0,0.6241634699,2.6478000117,-0.7490698287  
C,0,-0.6297869248,2.2400802374,-1.2952166656  
C,0,-1.7515452382,1.8339078608,-0.4274580862  
O,0,1.6795975156,2.754339233,-1.4187553394  
O,0,-1.2829276892,0.4670045248,-0.4536221276  
O,0,-2.2054680773,-0.6954172661,0.6282451163  
C,0,-3.0033412663,-1.5679861885,-0.1412383936  
C,0,-4.0672329145,-0.7972765934,-0.9459372878  
C,0,-2.1440403915,-2.4270982525,-1.0911125615  
C,0,-3.7008706072,-2.4777329971,0.8973097262  
H,0,-0.7024918199,2.0769888339,-2.3652339442  
H,0,-2.728350061,1.8744802635,-0.9202864974  
H,0,-2.7962957051,2.8805391987,1.157205142  
H,0,-1.7273754576,1.5998102231,1.69930523  
H,0,-0.9639713503,4.4104202866,0.7308942599  
H,0,-0.6659540572,3.7156619655,2.3203122758  
H,0,1.4352706575,3.7379072058,0.892221483  
H,0,0.9579441105,2.0929150073,1.3053460031  
H,0,-2.7578115841,-3.1414802953,-1.6531892296  
H,0,-1.6228263871,-1.7835575444,-1.8062940993  
H,0,-1.3973012981,-2.9925808863,-0.5215290914  
H,0,-4.7470553985,-1.4822350157,-1.4670151727  
H,0,-4.6592284131,-0.1640865558,-0.276798971  
H,0,-3.5875276452,-0.1586644698,-1.6933499276  
H,0,-4.3580972565,-3.2013332984,0.3992115676  
H,0,-2.9581023768,-3.0294873047,1.4828587482  
H,0,-4.3016822253,-1.8746212627,1.5848386689  
H,0,0.2187028207,-0.2167692317,-0.3785818361  
N,0,1.1901874753,-0.6104243889,-0.3959812974  
C,0,1.953542157,-0.4290757029,-1.6351936127  
C,0,3.1348604607,-1.3920440725,-1.6491075413

H,0,1.2697557244,-0.6240033101,-2.4651560249  
 H,0,2.2640186631,0.6207073938,-1.7074618135  
 C,0,1.680562493,-1.0950922259,0.7238503674  
 N,0,2.9718142311,-1.4688260523,0.8167559236  
 C,0,3.595999678,-1.9294364005,2.053776677  
 C,0,3.8890402421,-1.2965463174,-0.3251278907  
 H,0,3.9810933698,-2.9475794567,1.9262326067  
 H,0,4.4332132623,-1.2706037213,2.3117920574  
 H,0,2.889129223,-1.9232569196,2.8795139432  
 H,0,4.3954221703,-0.3263820265,-0.232721655  
 C,0,0.7424293567,-1.223936029,1.892345394  
 H,0,2.7873523106,-2.4212190842,-1.7980208852  
 H,0,3.8102038465,-1.1467937882,-2.473528377  
 H,0,4.6510238832,-2.0789673865,-0.2527553497  
 H,0,0.7784948419,-2.2361830545,2.3057550853  
 H,0,1.0183537844,-0.5211331702,2.685987635  
 H,0,-0.2851647961,-1.0202372704,1.5691037501

## Ts 2 from equatorial attack with DBU model, orientation B (15) – 6-31G\* - PCM Dichloroethane

E(RB+HF-LYP) = -962.839393931

|                                              |                             |
|----------------------------------------------|-----------------------------|
| Zero-point correction=                       | 0.451344 (Hartree/Particle) |
| Thermal correction to Energy=                | 0.475543                    |
| Thermal correction to Enthalpy=              | 0.476487                    |
| Thermal correction to Gibbs Free Energy=     | 0.396066                    |
| Sum of electronic and zero-point Energies=   | -962.388050                 |
| Sum of electronic and thermal Energies=      | -962.363851                 |
| Sum of electronic and thermal Enthalpies=    | -962.362907                 |
| Sum of electronic and thermal Free Energies= | -962.443328                 |

|       | E (Thermal) | CV             | S              |
|-------|-------------|----------------|----------------|
|       | KCal/Mol    | Cal/Mol-Kelvin | Cal/Mol-Kelvin |
| Total | 298.408     | 89.980         | 169.259        |

C,0,-2.3183927364,1.508897509,1.5507654899  
 C,0,-1.5950335369,2.8345919201,1.8286398022  
 C,0,-0.3505748721,2.9976885015,0.9456738617  
 C,0,-0.7067335341,2.948992127,-0.5444472822  
 C,0,-1.8131178658,2.1271373488,-0.9073748864  
 C,0,-2.4150968512,1.1716687903,0.049309272  
 O,0,-0.0507918878,3.6382737886,-1.3608020478  
 O,0,-1.4700723296,0.2082089529,-0.3958409381  
 O,0,-1.6415964787,-1.4148453529,0.5517816994  
 C,0,-2.1059858798,-2.4131600558,-0.3191787492  
 C,0,-3.5049429624,-2.0659059382,-0.8673612662  
 C,0,-1.1293534194,-2.6444518581,-1.4904440512  
 C,0,-2.1966370262,-3.6958492648,0.5408526571  
 H,0,-2.1127928255,2.0892530159,-1.9510552783  
 H,0,-3.4271676989,0.8508520437,-0.2242920753  
 H,0,-3.3275833272,1.5452404425,1.9804054048  
 H,0,-1.8041263069,0.6707775488,2.0327269701  
 H,0,-2.2769667028,3.6713909425,1.6238778137  
 H,0,-1.3267026292,2.9037927287,2.8911004753  
 H,0,0.158243726,3.9506377166,1.1325241341  
 H,0,0.3748692768,2.2018584104,1.171537696  
 H,0,-1.4705067313,-3.4492537425,-2.1544732763  
 H,0,-1.0353659099,-1.7265529323,-2.0794268468  
 H,0,-0.1361938283,-2.9137894532,-1.1111872928  
 H,0,-3.9188358264,-2.8811369351,-1.4747620696  
 H,0,-4.1937988846,-1.8687126664,-0.0377901138  
 H,0,-3.4500112497,-1.1671221285,-1.4895767307  
 H,0,-2.5753018826,-4.5420632581,-0.0471188817

H,0,-1.209380191,-3.9637699961,0.9339540919  
 H,0,-2.8702943341,-3.5345446259,1.3898526302  
 H,0,0.253853118,-0.0798312067,-0.1583695435  
 N,0,1.2810284586,-0.078580344,-0.2890048885  
 C,0,1.7896330125,0.6334962259,-1.4649514517  
 C,0,3.1432291773,0.0516391919,-1.8556607762  
 H,0,1.0502880122,0.511615144,-2.2605450233  
 H,0,1.8545749735,1.705744568,-1.2463133021  
 C,0,2.0446572533,-0.6871838497,0.6022601074  
 N,0,3.3779141039,-0.6659953999,0.5030819028  
 C,0,4.2700360701,-1.2601656349,1.4991745262  
 C,0,4.0533846325,-0.0065261536,-0.6328829063  
 H,0,4.7028375751,-2.1940721148,1.1212951121  
 H,0,5.0816757393,-0.5549583512,1.7041897987  
 H,0,3.7456575092,-1.4570663827,2.4323220841  
 H,0,4.3640446143,0.999206692,-0.3195789913  
 C,0,1.3538118027,-1.4004707044,1.7305655225  
 H,0,3.0116151628,-0.9570134118,-2.265166299  
 H,0,3.6117796175,0.6676573944,-2.6293040775  
 H,0,4.9585306832,-0.5822426323,-0.8520268347  
 H,0,1.7685593334,-2.4040188302,1.8649855537  
 H,0,1.4882329871,-0.8503376844,2.6697329786  
 H,0,0.284054047,-1.4849981285,1.5031938664

## Ts 2 from equatorial attack with DBU model, orientation B (15) – 6-31+G\*\* - PCM Dichloroethane

E(RB+HF-LYP) = -962.922272222

|                                              |                             |
|----------------------------------------------|-----------------------------|
| Zero-point correction=                       | 0.448187 (Hartree/Particle) |
| Thermal correction to Energy=                | 0.472561                    |
| Thermal correction to Enthalpy=              | 0.473505                    |
| Thermal correction to Gibbs Free Energy=     | 0.388791                    |
| Sum of electronic and zero-point Energies=   | -962.474085                 |
| Sum of electronic and thermal Energies=      | -962.449711                 |
| Sum of electronic and thermal Enthalpies=    | -962.448767                 |
| Sum of electronic and thermal Free Energies= | -962.533481                 |

|       | E (Thermal)<br>KCal/Mol | CV<br>Cal/Mol-Kelvin | S<br>Cal/Mol-Kelvin |
|-------|-------------------------|----------------------|---------------------|
| Total | 296.537                 | 90.503               | 178.296             |

C,0,1.9871922011,-0.8460887035,1.841496618  
 C,0,1.8943454287,-2.3792649957,1.8511410075  
 C,0,1.4846233556,-2.9297903375,0.4783925451  
 C,0,2.4769569361,-2.5080368179,-0.6080473744  
 C,0,3.0921810815,-1.2528925727,-0.4536414388  
 C,0,2.6242810342,-0.2731982589,0.5556887283  
 O,0,2.7263631064,-3.3238359288,-1.5527339979  
 O,0,1.6480304573,0.3173001781,-0.3317881537  
 O,0,0.8016662272,1.6013035823,0.42157712  
 C,0,1.1236400565,2.8357799235,-0.23272268  
 C,0,2.6162005772,3.1590328019,-0.0704180533  
 C,0,0.7403378825,2.7881240327,-1.7212402669  
 C,0,0.2732225564,3.8878556554,0.5055846274  
 H,0,3.8063307508,-0.9209240592,-1.2039645643  
 H,0,3.3832530567,0.4821598466,0.7933630018  
 H,0,2.559168789,-0.5051255698,2.7133346085  
 H,0,0.9896521735,-0.4047324239,1.9358611155  
 H,0,2.8726687268,-2.8040196022,2.1132322195  
 H,0,1.1913459105,-2.7087668226,2.6277649116  
 H,0,1.4373998714,-4.0248216273,0.4844703777  
 H,0,0.4811845726,-2.5674751107,0.2110922505

H,0,0.9893378619,3.7327723798,-2.2174783766  
 H,0,1.2788026146,1.9796083716,-2.2223040782  
 H,0,-0.3363088794,2.6203386601,-1.8393699628  
 H,0,2.8463208776,4.1437108883,-0.4925974763  
 H,0,2.8921489179,3.1637671829,0.9892393534  
 H,0,3.2262828537,2.4129867722,-0.5863325951  
 H,0,0.4555239946,4.8828113278,0.0834036333  
 H,0,-0.7947318393,3.6675789217,0.406563145  
 H,0,0.528266574,3.9117813564,1.5699065443  
 H,0,-0.5992427379,0.6914923691,-0.029719101  
 N,0,-1.4360735842,0.1229476288,-0.2805933446  
 C,0,-1.4488782636,-0.5577141309,-1.5773893165  
 C,0,-2.8824845097,-0.618579895,-2.0943885035  
 H,0,-0.7924585965,-0.002891032,-2.2498122255  
 H,0,-1.0290021802,-1.565528241,-1.4642250988  
 C,0,-2.4486377827,0.0841765698,0.5687162684  
 N,0,-3.571110818,-0.5848923938,0.2903194364  
 C,0,-4.700787158,-0.6924860115,1.2169063854  
 C,0,-3.784784726,-1.2266484151,-1.0257781673  
 H,0,-5.4926158909,0.0149187908,0.9438621053  
 H,0,-5.0995845554,-1.7087885556,1.1536885521  
 H,0,-4.3923712399,-0.5133476656,2.2445381245  
 H,0,-3.6050828129,-2.3044966246,-0.9189628292  
 C,0,-2.2857023329,0.8175583655,1.8698308365  
 H,0,-3.2294573309,0.390478774,-2.3469713294  
 H,0,-2.9345380026,-1.2274400296,-3.0018092201  
 H,0,-4.8392321448,-1.0878576043,-1.2858163996  
 H,0,-3.1078189779,1.5213403537,2.0279012282  
 H,0,-2.271290271,0.1148286373,2.7096539188  
 H,0,-1.3423776181,1.3641477777,1.8621784811

### Ts 1 from gauche axial attack with DBU model – 6-31G\* - Gas Phase

E(RB+HF-LYP) = -962.820402562

|                                              |                             |
|----------------------------------------------|-----------------------------|
| Zero-point correction=                       | 0.453043 (Hartree/Particle) |
| Thermal correction to Energy=                | 0.476616                    |
| Thermal correction to Enthalpy=              | 0.477560                    |
| Thermal correction to Gibbs Free Energy=     | 0.400048                    |
| Sum of electronic and zero-point Energies=   | -962.367360                 |
| Sum of electronic and thermal Energies=      | -962.343787                 |
| Sum of electronic and thermal Enthalpies=    | -962.342843                 |
| Sum of electronic and thermal Free Energies= | -962.420354                 |

|       | E (Thermal) | CV             | S              |
|-------|-------------|----------------|----------------|
|       | KCal/Mol    | Cal/Mol-Kelvin | Cal/Mol-Kelvin |
| Total | 299.081     | 89.260         | 163.137        |

C,0,-1.5318480328,2.2492504134,1.310174344  
 C,0,-0.2013863006,2.1428523152,2.065514524  
 C,0,0.9626916449,2.723670573,1.2506511531  
 C,0,0.9967274084,2.2615377466,-0.218611864  
 C,0,-0.2368796847,1.9621060162,-0.826771409  
 C,0,-1.4353800731,1.6986147779,-0.1026741545  
 O,0,2.1186998799,2.2349519972,-0.8002337283  
 O,0,-1.6478620577,-0.0124510679,0.1998599098  
 O,0,-2.0101398078,-0.5971813404,-1.0871304695  
 C,0,-3.2534642447,-1.321223621,-0.9641071808  
 C,0,-3.1022631903,-2.459302078,0.0541756782  
 C,0,-4.3951732046,-0.374725312,-0.5752692767  
 C,0,-3.4534625288,-1.8728044577,-2.381200519  
 H,0,-0.2374599191,1.776643524,-1.8974982065  
 H,0,-2.3615594491,1.7989344664,-0.6684782085

H,0,-1.8207413974,3.3074434604,1.2261278145  
 H,0,-2.3330572106,1.7455705012,1.8639112502  
 H,0,-0.280123392,2.6428296436,3.040735255  
 H,0,-0.008408835,1.0832143717,2.2804010738  
 H,0,0.893665187,3.8223032984,1.2436347068  
 H,0,1.932270982,2.4879516238,1.7080787388  
 H,0,-5.3452283925,-0.9184327418,-0.5148203506  
 H,0,-4.1942512752,0.0819708341,0.3972140263  
 H,0,-4.5014659519,0.4224057145,-1.3190110928  
 H,0,-4.0191287209,-3.0572121452,0.1120597433  
 H,0,-2.2774904904,-3.1209462074,-0.2351109474  
 H,0,-2.8897366732,-2.0516369032,1.0461301537  
 H,0,-4.3791195599,-2.4560510782,-2.4353044593  
 H,0,-3.5153771863,-1.0549194076,-3.1063925354  
 H,0,-2.6183132488,-2.522610467,-2.6637646283  
 H,0,-0.1386487313,-0.8470574541,0.1974894197  
 N,0,0.8246289878,-1.2155379401,0.3973982288  
 C,0,1.1021022829,-1.5652867962,1.7882860709  
 C,0,2.3776402416,-0.8701576745,2.256089272  
 H,0,0.2345494678,-1.2629756005,2.3794787002  
 H,0,1.1994062362,-2.6558507199,1.875429836  
 C,0,1.7819897832,-0.9186355493,-0.4709300199  
 N,0,3.0760477573,-0.9473765246,-0.13031415  
 C,0,4.0978165968,-0.4219869797,-1.047234667  
 C,0,3.5054502668,-1.1499584284,1.2671034725  
 H,0,4.0331460178,0.6719409269,-1.0679679819  
 H,0,5.0779905062,-0.7457918049,-0.6912882782  
 H,0,3.9568638516,-0.8159500311,-2.0544551407  
 H,0,3.8796404262,-2.177143915,1.3735007872  
 C,0,1.3884922646,-0.5872974654,-1.8772305175  
 H,0,2.2026061438,0.2081808957,2.3158620272  
 H,0,2.6682313518,-1.2221676013,3.2509985985  
 H,0,4.3430981301,-0.4724326369,1.4544985572  
 H,0,1.6979748473,0.4443121235,-2.0863826012  
 H,0,1.8834044146,-1.2758847365,-2.5719944739  
 H,0,0.3086221636,-0.6787142739,-1.990425469

### Ts 1 from gauche axial attack with DBU model – 6-31+G\*\* - Gas Phase

E(RB+HF-LYP) = -962.897285038

|                                              |                             |
|----------------------------------------------|-----------------------------|
| Zero-point correction=                       | 0.450208 (Hartree/Particle) |
| Thermal correction to Energy=                | 0.473932                    |
| Thermal correction to Enthalpy=              | 0.474876                    |
| Thermal correction to Gibbs Free Energy=     | 0.396692                    |
| Sum of electronic and zero-point Energies=   | -962.447077                 |
| Sum of electronic and thermal Energies=      | -962.423353                 |
| Sum of electronic and thermal Enthalpies=    | -962.422409                 |
| Sum of electronic and thermal Free Energies= | -962.500593                 |

|       | E (Thermal)<br>KCal/Mol | CV<br>Cal/Mol-Kelvin | S<br>Cal/Mol-Kelvin |
|-------|-------------------------|----------------------|---------------------|
| Total | 297.397                 | 89.900               | 164.553             |

C,0,-1.6417667502,2.2198364349,1.2647475416  
 C,0,-0.3723778897,2.1222387601,2.1209270556  
 C,0,0.8452038499,2.7132095211,1.3959005447  
 C,0,0.9952921093,2.250819771,-0.0641670495  
 C,0,-0.1822878012,1.9437009658,-0.7690976623  
 C,0,-1.4344145981,1.6593293378,-0.1332661925  
 O,0,2.1651918111,2.2233543127,-0.556403363  
 O,0,-1.6209814257,-0.0306896228,0.1577773553  
 O,0,-2.0065967819,-0.6508424774,-1.1048516107

C,0,-3.2960248046,-1.3018516494,-0.9754366054  
 C,0,-3.2236808259,-2.4109835198,0.0823899169  
 C,0,-4.3894193047,-0.2818654075,-0.636095788  
 C,0,-3.5083187289,-1.8897410548,-2.3762108921  
 H,0,-0.0974258879,1.7546841362,-1.8351033234  
 H,0,-2.3137940103,1.7571635985,-0.7692392317  
 H,0,-1.9228156694,3.2763349813,1.1479936575  
 H,0,-2.4822047192,1.7186688724,1.7579071774  
 H,0,-0.5286859957,2.6245890047,3.0848284079  
 H,0,-0.1867457007,1.0648826736,2.352487355  
 H,0,0.7651160284,3.8102109288,1.3727222942  
 H,0,1.7775432252,2.4920993385,1.9290545466  
 H,0,-5.3654423347,-0.7760398788,-0.5775107593  
 H,0,-4.1845328917,0.1911841531,0.3273613351  
 H,0,-4.4433331203,0.49601725,-1.4042822308  
 H,0,-4.1744297856,-2.9526719969,0.1370207742  
 H,0,-2.4333458648,-3.126660333,-0.1684678247  
 H,0,-3.0111224283,-1.984802892,1.0661443281  
 H,0,-4.4665286194,-2.4175947909,-2.419184852  
 H,0,-3.51494821,-1.0969378159,-3.1305089784  
 H,0,-2.7120531054,-2.5986015901,-2.6246696771  
 H,0,-0.0755880946,-0.8731166417,0.1814356552  
 N,0,0.8919931465,-1.2167444372,0.3783352516  
 C,0,1.2038873041,-1.5312670553,1.771224448  
 C,0,2.4694238539,-0.7911014415,2.1963606735  
 H,0,0.342104831,-1.2399225567,2.3753287923  
 H,0,1.3325683142,-2.6166657477,1.8774412498  
 C,0,1.8318573626,-0.9320172341,-0.5145013343  
 N,0,3.1307485718,-0.9483582674,-0.1975306272  
 C,0,4.1450807146,-0.4862459244,-1.154319404  
 C,0,3.589454478,-1.0762050348,1.2008699764  
 H,0,4.1422044968,0.6093275342,-1.1887972278  
 H,0,5.1188834012,-0.8534987761,-0.8247983183  
 H,0,3.9534413583,-0.884775655,-2.1502851492  
 H,0,4.0006876299,-2.0845358951,1.3414727985  
 C,0,1.4085003776,-0.6389492361,-1.9204531935  
 H,0,2.2701940066,0.2834966113,2.2232820992  
 H,0,2.7825238057,-1.104525016,3.1968056735  
 H,0,4.4039738574,-0.3603525366,1.3417129774  
 H,0,1.7483080381,0.3645585807,-2.1916659925  
 H,0,1.8494615476,-1.3760483008,-2.6005966013  
 H,0,0.3234289618,-0.6887694067,-1.9989325899

### Ts 1 from gauche axial attack with DBU model B – 6-31G\* - PCM Dichloroethane

E(RB+HF-LYP) = -962.838975684

|                                              |                             |
|----------------------------------------------|-----------------------------|
| Zero-point correction=                       | 0.451263 (Hartree/Particle) |
| Thermal correction to Energy=                | 0.475426                    |
| Thermal correction to Enthalpy=              | 0.476370                    |
| Thermal correction to Gibbs Free Energy=     | 0.395813                    |
| Sum of electronic and zero-point Energies=   | -962.387713                 |
| Sum of electronic and thermal Energies=      | -962.363550                 |
| Sum of electronic and thermal Enthalpies=    | -962.362606                 |
| Sum of electronic and thermal Free Energies= | -962.443163                 |

|       | E (Thermal) | CV             | S              |
|-------|-------------|----------------|----------------|
|       | KCal/Mol    | Cal/Mol-Kelvin | Cal/Mol-Kelvin |
| Total | 298.334     | 89.629         | 169.547        |

C,0,-1.3941410854,2.6197879512,1.2183860244  
 C,0,0.0907269146,2.7195179512,1.5882610244  
 C,0,0.9068949146,3.3506629512,0.4535430244

C,0,0.6193699146,2.7476139512,-0.9300529756  
 C,0,-0.6611650854,2.1795979512,-1.1448509756  
 C,0,-1.5900460854,1.9438099512,-0.1202329756  
 O,0,1.5053379146,2.8486589512,-1.8184289756  
 O,0,-1.5245430854,0.1339429512,0.4912610244  
 O,0,-2.0505650854,-0.6410140488,-0.6237809756  
 C,0,-3.1305910854,-1.4844530488,-0.1709799756  
 C,0,-2.6234540854,-2.4684650488,0.8921370244  
 C,0,-4.2860130854,-0.6328310488,0.3697750244  
 C,0,-3.5432260854,-2.2221450488,-1.4504789756  
 H,0,-0.8803470854,1.8222209512,-2.1498309756  
 H,0,-2.6247540854,1.7865369512,-0.4143789756  
 H,0,-1.8264070854,3.6313209512,1.1527910244  
 H,0,-1.9554150854,2.0863929512,1.9933360244  
 H,0,0.2155259146,3.2907709512,2.5176120244  
 H,0,0.4721169146,1.7096389512,1.7870800244  
 H,0,0.6844489146,4.4283079512,0.3922210244  
 H,0,1.9844469146,3.2714929512,0.6423710244  
 H,0,-5.1188310854,-1.2672330488,0.6952330244  
 H,0,-3.9460550854,-0.0373860488,1.2209910244  
 H,0,-4.6549110854,0.0475529512,-0.4062489756  
 H,0,-3.4217060854,-3.1502960488,1.2075930244  
 H,0,-1.7959500854,-3.0659490488,0.4923920244  
 H,0,-2.2641800854,-1.9208070488,1.7676100244  
 H,0,-4.3760090854,-2.9037390488,-1.2456429756  
 H,0,-3.8600420854,-1.5094660488,-2.2195889756  
 H,0,-2.7061670854,-2.8076790488,-1.8462159756  
 H,0,-0.0335640854,-0.5036380488,0.4519980244  
 N,0,0.9388589146,-0.9308870488,0.5497890244  
 C,0,1.3803839146,-1.2498330488,1.9085810244  
 C,0,2.8895259146,-1.0688710488,2.0238310244  
 H,0,0.8410199146,-0.5910490488,2.5952960244  
 H,0,1.0924279146,-2.2820060488,2.1483600244  
 C,0,1.7172399146,-1.0184400488,-0.5128609756  
 N,0,2.9996389146,-1.4037900488,-0.4207559756  
 C,0,3.8445449146,-1.5972000488,-1.6016759756  
 C,0,3.5784519146,-1.8019590488,0.8764200244  
 H,0,4.8829999146,-1.4151810488,-1.3153129756  
 H,0,3.7626499146,-2.6205670488,-1.9890559756  
 H,0,3.5824809146,-0.8911750488,-2.3893279756  
 H,0,3.4871589146,-2.8907890488,0.9931310244  
 C,0,1.1201599146,-0.6628970488,-1.8448839756  
 H,0,3.1430959146,-0.0029600488,1.9838470244  
 H,0,3.2501899146,-1.4633860488,2.9789580244  
 H,0,4.6446719146,-1.5584370488,0.8506240244  
 H,0,1.4690149146,0.3280579512,-2.1634969756  
 H,0,1.3950319146,-1.4012800488,-2.6031259756  
 H,0,0.0337659146,-0.6326100488,-1.7543619756

### Ts 1 from gauche axial attack with DBU model B – 6-31+G\*\* - PCM Dichloroethane

E(RB+HF-LYP) = -962.921673226

|                                              |                             |
|----------------------------------------------|-----------------------------|
| Zero-point correction=                       | 0.447355 (Hartree/Particle) |
| Thermal correction to Energy=                | 0.471892                    |
| Thermal correction to Enthalpy=              | 0.472836                    |
| Thermal correction to Gibbs Free Energy=     | 0.390338                    |
| Sum of electronic and zero-point Energies=   | -962.474319                 |
| Sum of electronic and thermal Energies=      | -962.449781                 |
| Sum of electronic and thermal Enthalpies=    | -962.448837                 |
| Sum of electronic and thermal Free Energies= | -962.531335                 |

E (Thermal)

CV

S

| Total                                         | KCal/Mol<br>296.117 | Cal/Mol-Kelvin<br>90.569 | Cal/Mol-Kelvin<br>173.633 |
|-----------------------------------------------|---------------------|--------------------------|---------------------------|
| C,0,-2.1503100427,2.0673620061,1.2675990366   |                     |                          |                           |
| C,0,-0.7943060427,2.6780060061,1.6398630366   |                     |                          |                           |
| C,0,-0.3307390427,3.6772430061,0.5728850366   |                     |                          |                           |
| C,0,-0.4676170427,3.1703720061,-0.8657049634  |                     |                          |                           |
| C,0,-1.3687670427,2.1098270061,-1.1230779634  |                     |                          |                           |
| C,0,-2.1138200427,1.4651850061,-0.1180039634  |                     |                          |                           |
| O,0,0.1822859573,3.7780140061,-1.7679929634   |                     |                          |                           |
| O,0,-1.3615060427,-0.2348869939,0.3793590366  |                     |                          |                           |
| O,0,-1.6992790427,-1.1728519939,-0.6789699634 |                     |                          |                           |
| C,0,-2.5286880427,-2.2460859939,-0.1673369634 |                     |                          |                           |
| C,0,-1.7716210427,-3.0323299939,0.9111100366  |                     |                          |                           |
| C,0,-3.8547660427,-1.6994209939,0.3765220366  |                     |                          |                           |
| C,0,-2.7631150427,-3.1107839939,-1.4120799634 |                     |                          |                           |
| H,0,-1.4780270427,1.7881650061,-2.1578329634  |                     |                          |                           |
| H,0,-3.0122320427,0.9416720061,-0.4305159634  |                     |                          |                           |
| H,0,-2.9242450427,2.8513750061,1.2757070366   |                     |                          |                           |
| H,0,-2.4568800427,1.3113090061,1.9971830366   |                     |                          |                           |
| H,0,-0.8485920427,3.1652260061,2.6213980366   |                     |                          |                           |
| H,0,-0.0567300427,1.8702060061,1.7262650366   |                     |                          |                           |
| H,0,-0.9273270427,4.6003780061,0.6401390366   |                     |                          |                           |
| H,0,0.7125159573,3.9760530061,0.7299870366    |                     |                          |                           |
| H,0,-4.4867100427,-2.5194749939,0.7356750366  |                     |                          |                           |
| H,0,-3.6705140427,-1.0143279939,1.2080870366  |                     |                          |                           |
| H,0,-4.4015380427,-1.1633069939,-0.4065629634 |                     |                          |                           |
| H,0,-2.3659410427,-3.8874369939,1.2520320366  |                     |                          |                           |
| H,0,-0.8226770427,-3.4069649939,0.5123420366  |                     |                          |                           |
| H,0,-1.5603410427,-2.3914259939,1.7710280366  |                     |                          |                           |
| H,0,-3.3897190427,-3.9725319939,-1.1590919634 |                     |                          |                           |
| H,0,-3.2685060427,-2.5336139939,-2.1932149634 |                     |                          |                           |
| H,0,-1.8132280427,-3.4797879939,-1.8122829634 |                     |                          |                           |
| H,0,0.2154559573,-0.4439929939,0.4043480366   |                     |                          |                           |
| N,0,1.2597499573,-0.6466009939,0.5178360366   |                     |                          |                           |
| C,0,1.7589509573,-0.8988339939,1.8701910366   |                     |                          |                           |
| C,0,3.2038169573,-0.4230369939,1.9788520366   |                     |                          |                           |
| H,0,1.1061879573,-0.3711939939,2.5706700366   |                     |                          |                           |
| H,0,1.6856769573,-1.9717409939,2.0933230366   |                     |                          |                           |
| C,0,2.0403019573,-0.6406789939,-0.5470149634  |                     |                          |                           |
| N,0,3.3602079573,-0.8600989939,-0.4558339634  |                     |                          |                           |
| C,0,4.2538949573,-0.9086449939,-1.6148669634  |                     |                          |                           |
| C,0,4.0259039573,-1.0383449939,0.8512080366   |                     |                          |                           |
| H,0,4.8402149573,0.0149050061,-1.6867899634   |                     |                          |                           |
| H,0,4.9400309573,-1.7519789939,-1.4919499634  |                     |                          |                           |
| H,0,3.6993509573,-1.0528229939,-2.5396029634  |                     |                          |                           |
| H,0,4.1889039573,-2.1114329939,1.0183550366   |                     |                          |                           |
| C,0,1.3955979573,-0.3845219939,-1.8803719634  |                     |                          |                           |
| H,0,3.2411589573,0.6708110061,1.9128920366    |                     |                          |                           |
| H,0,3.6318739573,-0.7141959939,2.9427420366   |                     |                          |                           |
| H,0,5.0079839573,-0.5586989939,0.7854640366   |                     |                          |                           |
| H,0,1.8631229573,0.4666440061,-2.3835459634   |                     |                          |                           |
| H,0,1.4945999573,-1.2627939939,-2.5268439634  |                     |                          |                           |
| H,0,0.3361139573,-0.1761929939,-1.7412219634  |                     |                          |                           |

### Intermediate from gauche axial attack with DBU model – 6-31G\* - Gas Phase

E(RB+HF-LYP) = -962.825878133

|                                            |                             |
|--------------------------------------------|-----------------------------|
| Zero-point correction=                     | 0.454975 (Hartree/Particle) |
| Thermal correction to Energy=              | 0.478533                    |
| Thermal correction to Enthalpy=            | 0.479477                    |
| Thermal correction to Gibbs Free Energy=   | 0.402756                    |
| Sum of electronic and zero-point Energies= | -962.370904                 |

Sum of electronic and thermal Energies= -962.347345  
 Sum of electronic and thermal Enthalpies= -962.346401  
 Sum of electronic and thermal Free Energies= -962.423122

|       | E (Thermal)<br>KCal/Mol | CV<br>Cal/Mol-Kelvin | S<br>Cal/Mol-Kelvin |
|-------|-------------------------|----------------------|---------------------|
| Total | 300.284                 | 90.134               | 161.473             |

C,0,-0.8308554138,2.9623179239,0.7709786372  
 C,0,0.5873233122,2.7510073155,1.3125038486  
 C,0,1.6145347965,2.6735709827,0.1747708287  
 C,0,1.1893951663,1.8069470107,-1.0241561936  
 C,0,-0.1610139715,1.5358035357,-1.1963143136  
 C,0,-1.2184208877,1.8747887618,-0.2343303174  
 O,0,2.1261772563,1.4384161614,-1.8172293224  
 O,0,-1.6217409521,0.7233163925,0.69679726  
 O,0,-2.0272956845,-0.4021613873,-0.1465516074  
 C,0,-3.3655913643,-0.8239469221,0.2193025174  
 C,0,-3.3970995057,-1.2725447676,1.6854945622  
 C,0,-4.366764088,0.3065261693,-0.0400033424  
 C,0,-3.611254407,-2.0047339769,-0.7278286098  
 H,0,-0.4666786436,1.0320544943,-2.109768905  
 H,0,-2.1640634465,2.1293817769,-0.7285181645  
 H,0,-0.8888780816,3.9253299032,0.2462597901  
 H,0,-1.5603151907,2.9989384606,1.5906440576  
 H,0,0.8477472507,3.5548332397,2.0151620101  
 H,0,0.5982825791,1.818529534,1.8928257526  
 H,0,1.8161176227,3.6836535903,-0.2136151153  
 H,0,2.5829970001,2.3043745161,0.5400040427  
 H,0,-5.3863464928,-0.0284033899,0.1826433475  
 H,0,-4.1395991986,1.1688257544,0.5915424324  
 H,0,-4.3267595379,0.6211803668,-1.0878835655  
 H,0,-4.3959705864,-1.632110926,1.9575502077  
 H,0,-2.6840211017,-2.0878856708,1.8550024714  
 H,0,-3.1363747258,-0.4392527148,2.3427078379  
 H,0,-4.6114887539,-2.4180512106,-0.5606227418  
 H,0,-3.5398315101,-1.6836885634,-1.7720715351  
 H,0,-2.8803237457,-2.8032532529,-0.5574928471  
 H,0,-0.3761439825,-1.3403087759,-0.1560558193  
 N,0,0.5707120215,-1.5816230944,0.1556965367  
 C,0,0.7767088342,-1.5031411749,1.6045821209  
 C,0,2.1474191065,-0.907084641,1.9053803495  
 H,0,-0.023591271,-0.8742402041,2.0013541344  
 H,0,0.6808318881,-2.5069640113,2.0387233712  
 C,0,1.5382942895,-1.474131926,-0.7494176261  
 N,0,2.8263846236,-1.4975236355,-0.3964995545  
 C,0,3.8658682225,-1.1065408899,-1.3663952091  
 C,0,3.2044985073,-1.569591355,1.026202851  
 H,0,3.7338426047,-0.0431505268,-1.6072440774  
 H,0,4.8406634975,-1.2961398096,-0.9144137221  
 H,0,3.7930413376,-1.7077387807,-2.2753330172  
 H,0,3.3475922308,-2.6223117463,1.3062863905  
 C,0,1.1622777217,-1.3322260652,-2.1871145748  
 H,0,2.1334221002,0.1672615045,1.7002446648  
 H,0,2.3989311079,-1.0493647199,2.9610858659  
 H,0,4.1653068422,-1.0633023917,1.1398799697  
 H,0,1.4689338193,-0.3091081734,-2.4878082555  
 H,0,1.6787061092,-2.0781900776,-2.7995538233  
 H,0,0.0852468946,-1.4455603043,-2.3119774472

### Intermediate from gauche axial attack with DBU model – 6-31+G\*\* - Gas Phase

E(RB+HF-LYP) = -962.901682774

|                                              |                             |
|----------------------------------------------|-----------------------------|
| Zero-point correction=                       | 0.451487 (Hartree/Particle) |
| Thermal correction to Energy=                | 0.475532                    |
| Thermal correction to Enthalpy=              | 0.476477                    |
| Thermal correction to Gibbs Free Energy=     | 0.397937                    |
| Sum of electronic and zero-point Energies=   | -962.450196                 |
| Sum of electronic and thermal Energies=      | -962.426150                 |
| Sum of electronic and thermal Enthalpies=    | -962.425206                 |
| Sum of electronic and thermal Free Energies= | -962.503746                 |

|       | E (Thermal) | CV             | S              |
|-------|-------------|----------------|----------------|
|       | KCal/Mol    | Cal/Mol-Kelvin | Cal/Mol-Kelvin |
| Total | 298.401     | 91.174         | 165.300        |

C,0,-0.8971873686,2.9994145981,0.7821362374  
 C,0,0.4988611654,2.8163147239,1.389789456  
 C,0,1.5765273862,2.7283237189,0.3000217396  
 C,0,1.2201760718,1.8200430581,-0.8888164041  
 C,0,-0.1217251658,1.5527245198,-1.1365614804  
 C,0,-1.2265110938,1.8967929534,-0.2276545199  
 O,0,2.2010853558,1.409647742,-1.608465838  
 O,0,-1.6555821253,0.749094562,0.7022984583  
 O,0,-2.0299160328,-0.3963428619,-0.1279405639  
 C,0,-3.3863020063,-0.8124959742,0.1927482045  
 C,0,-3.4756799056,-1.2295601477,1.6661134298  
 C,0,-4.3784438576,0.3095127958,-0.1312390786  
 C,0,-3.5932359827,-2.0145204706,-0.7371743286  
 H,0,-0.3765886158,1.0193230686,-2.0480689702  
 H,0,-2.1512435386,2.132326241,-0.7670109034  
 H,0,-0.9444919803,3.9545097734,0.242894662  
 H,0,-1.6625805782,3.0346333041,1.5674840241  
 H,0,0.7182424303,3.6402813122,2.0820844718  
 H,0,0.499251433,1.8972000028,1.9907689788  
 H,0,1.770560781,3.7277862915,-0.1168253065  
 H,0,2.5355828364,2.3939576896,0.7165165765  
 H,0,-5.4033507076,-0.0273602125,0.0586372944  
 H,0,-4.182594079,1.1856475129,0.4910906925  
 H,0,-4.2992885715,0.6016826081,-1.1827496832  
 H,0,-4.4839648279,-1.5876597099,1.9005644057  
 H,0,-2.768058213,-2.0374567419,1.8823334766  
 H,0,-3.2480029372,-0.3821354036,2.3168551759  
 H,0,-4.5961645043,-2.4281391446,-0.5918197481  
 H,0,-3.4918621301,-1.716317921,-1.7851599775  
 H,0,-2.8659037992,-2.8053833863,-0.5254413171  
 H,0,-0.3545914912,-1.3215092534,-0.1364675334  
 N,0,0.5941901347,-1.5863292061,0.1467658764  
 C,0,0.8607855888,-1.5311084398,1.5862883823  
 C,0,2.2065767971,-0.8567207394,1.8291085849  
 H,0,0.0436799414,-0.9665428494,2.0405493799  
 H,0,0.8507780862,-2.5488177396,1.9977741254  
 C,0,1.5409909415,-1.5140815793,-0.7844701181  
 N,0,2.8359963438,-1.5501954458,-0.4667559979  
 C,0,3.8658619931,-1.2744425368,-1.4820690787  
 C,0,3.2721894637,-1.4941375382,0.9431008482  
 H,0,3.8550187284,-0.2026276004,-1.7148952315  
 H,0,4.8320194197,-1.5787061102,-1.0766336108  
 H,0,3.6829540832,-1.8537395063,-2.3874963679  
 H,0,3.5154781478,-2.5106949095,1.2799358542  
 C,0,1.1216423645,-1.4023271059,-2.2154680613  
 H,0,2.1278131519,0.2069116712,1.5901048094  
 H,0,2.4966425671,-0.9518544089,2.8796804856  
 H,0,4.190257419,-0.9030044242,0.9757313964  
 H,0,1.4521919567,-0.4127527023,-2.5660743083  
 H,0,1.5774712981,-2.1920277292,-2.8197140698

H,0,0.0375824141,-1.4734437117,-2.2969772602

### Intermediate from gauche axial attack with DBU model B – 6-31G\* - PCM Dichloroethane

E(RB+HF-LYP) = -962.845136389

|                                              |                             |
|----------------------------------------------|-----------------------------|
| Zero-point correction=                       | 0.454455 (Hartree/Particle) |
| Thermal correction to Energy=                | 0.478157                    |
| Thermal correction to Enthalpy=              | 0.479101                    |
| Thermal correction to Gibbs Free Energy=     | 0.401697                    |
| Sum of electronic and zero-point Energies=   | -962.390681                 |
| Sum of electronic and thermal Energies=      | -962.366980                 |
| Sum of electronic and thermal Enthalpies=    | -962.366035                 |
| Sum of electronic and thermal Free Energies= | -962.443439                 |

|       | E (Thermal)<br>KCal/Mol | CV<br>Cal/Mol-Kelvin | S<br>Cal/Mol-Kelvin |
|-------|-------------------------|----------------------|---------------------|
| Total | 300.048                 | 90.218               | 162.910             |

C,0,-0.8072824052,2.9422553416,0.796111605  
 C,0,0.6420295601,2.7169602498,1.2387144427  
 C,0,1.5986994685,2.7220733176,0.0394281517  
 C,0,1.1043285987,1.9358373721,-1.186513934  
 C,0,-0.2403033836,1.6167550951,-1.2708201744  
 C,0,-1.2500882715,1.8889903805,-0.2248225926  
 O,0,1.9900993871,1.6688409629,-2.0849446715  
 O,0,-1.5795659996,0.7104147959,0.6610297289  
 O,0,-2.0036358227,-0.395698243,-0.1987848595  
 C,0,-3.3324912464,-0.8406319815,0.1930569064  
 C,0,-3.3244459461,-1.3198190607,1.6489291732  
 C,0,-4.3514613317,0.2830355703,-0.019547992  
 C,0,-3.5847073835,-2.0040616522,-0.7732250834  
 H,0,-0.5868366512,1.1113831621,-2.1703646096  
 H,0,-2.2197373917,2.1684696527,-0.6583160296  
 H,0,-0.9035187904,3.9262219318,0.3168679135  
 H,0,-1.4860318594,2.9382574042,1.6589689992  
 H,0,0.938100913,3.4789914914,1.9728010027  
 H,0,0.6978773549,1.7491516519,1.7527561151  
 H,0,1.7849535027,3.7590931475,-0.2843548904  
 H,0,2.5819216348,2.3221186828,0.3227332743  
 H,0,-5.3602878679,-0.0713845633,0.2203115103  
 H,0,-4.1232299501,1.1352219306,0.6259231813  
 H,0,-4.3418863472,0.6190156653,-1.0617318821  
 H,0,-4.314282398,-1.6953679051,1.9318320273  
 H,0,-2.6015115682,-2.1322944256,1.7863568196  
 H,0,-3.0602928726,-0.4989708946,2.3207550275  
 H,0,-4.5778874365,-2.4283811464,-0.5920475315  
 H,0,-3.5391918467,-1.6620804003,-1.8124654253  
 H,0,-2.8438060369,-2.7991975322,-0.6339051525  
 H,0,-0.3809736728,-1.3573721603,-0.0415421185  
 N,0,0.5718354138,-1.5786708352,0.2640231302  
 C,0,0.7924178351,-1.6093095945,1.7134637478  
 C,0,2.1722304176,-1.0498495995,2.0453244632  
 H,0,0.0023744562,-1.0077447035,2.1695327126  
 H,0,0.6917493927,-2.6418003656,2.0713803646  
 C,0,1.5313442676,-1.4403440723,-0.6431251952  
 N,0,2.8199764506,-1.4569585553,-0.3007203725  
 C,0,3.8541390188,-1.1529816603,-1.3018587908  
 C,0,3.2178277824,-1.6474093609,1.1076073976  
 H,0,3.6620926631,-0.1620521354,-1.7281798815  
 H,0,4.8233466778,-1.1592328035,-0.8023631343  
 H,0,3.8728710993,-1.9070629516,-2.0949397306  
 H,0,3.3517384459,-2.7204457489,1.2997656172

C,0,1.143736792,-1.2857353723,-2.0795961474  
 H,0,2.1688166092,0.0394873172,1.9344721797  
 H,0,2.432032169,-1.2825703908,3.0827279768  
 H,0,4.1841755835,-1.158391732,1.2510627107  
 H,0,1.4450706571,-0.2790760544,-2.4188129399  
 H,0,1.6443060983,-2.0461098014,-2.6889782869  
 H,0,0.0643412266,-1.3915205523,-2.1905225731

### Intermediate from gauche axial attack with DBU model B – 6-31+G\*\* - PCM Dichloroethane

E(RB+HF-LYP) = -962.926189324

|                                              |                             |
|----------------------------------------------|-----------------------------|
| Zero-point correction=                       | 0.450342 (Hartree/Particle) |
| Thermal correction to Energy=                | 0.474668                    |
| Thermal correction to Enthalpy=              | 0.475612                    |
| Thermal correction to Gibbs Free Energy=     | 0.395179                    |
| Sum of electronic and zero-point Energies=   | -962.475847                 |
| Sum of electronic and thermal Energies=      | -962.451521                 |
| Sum of electronic and thermal Enthalpies=    | -962.450577                 |
| Sum of electronic and thermal Free Energies= | -962.531010                 |

|       | E (Thermal) | CV             | S              |
|-------|-------------|----------------|----------------|
|       | KCal/Mol    | Cal/Mol-Kelvin | Cal/Mol-Kelvin |
| Total | 297.859     | 91.300         | 169.286        |

C,0,-1.4383120854,2.7529750854,1.0564830305  
 C,0,0.0031489146,2.7307310854,1.5782460305  
 C,0,0.9992769146,3.0868500854,0.4666970305  
 C,0,0.7296519146,2.4036080854,-0.8794729695  
 C,0,-0.5148260854,1.8473510854,-1.1145229695  
 C,0,-1.6189440854,1.7926890854,-0.1237109695  
 O,0,1.7033769146,2.4267550854,-1.7366469695  
 O,0,-1.7680120854,0.4659400854,0.5787750305  
 O,0,-1.8948590854,-0.5815579146,-0.4355469695  
 C,0,-3.1335160854,-1.3279339146,-0.2342269695  
 C,0,-3.1327230854,-1.9928639146,1.1468050305  
 C,0,-4.3436620854,-0.4063399146,-0.4127499695  
 C,0,-3.0652900854,-2.3734039146,-1.3540079695  
 H,0,-0.6961830854,1.3960080854,-2.0882319695  
 H,0,-2.5946620854,1.9514810854,-0.6005749695  
 H,0,-1.6937810854,3.7615940854,0.7046170305  
 H,0,-2.1490560854,2.5025640854,1.8539570305  
 H,0,0.1106029146,3.4219310854,2.4245580305  
 H,0,0.2225409146,1.7260640854,1.9610530305  
 H,0,0.9898879146,4.1738230854,0.2887560305  
 H,0,2.0257009146,2.8416990854,0.7685870305  
 H,0,-5.2693840854,-0.9850049146,-0.3254669695  
 H,0,-4.3525270854,0.3722660854,0.3540790305  
 H,0,-4.3251900854,0.0685220854,-1.3986329695  
 H,0,-4.0351550854,-2.6006309146,1.2724790305  
 H,0,-2.2627260854,-2.6481009146,1.2613710305  
 H,0,-3.1114100854,-1.2393889146,1.9380810305  
 H,0,-3.9570190854,-3.0073519146,-1.3192339695  
 H,0,-3.0230000854,-1.8906519146,-2.3351789695  
 H,0,-2.1863950854,-3.0163379146,-1.2403179695  
 H,0,-0.1141680854,-1.1421539146,-0.1322169695  
 N,0,0.8279739146,-1.3481829146,0.2163610305  
 C,0,0.9638979146,-1.5822419146,1.6578240305  
 C,0,2.3068779146,-1.0434069146,2.1380010305  
 H,0,0.1295439146,-1.0760359146,2.1489170305  
 H,0,0.8794269146,-2.6574699146,1.8607830305  
 C,0,1.8465739146,-1.1451299146,-0.6100709695  
 N,0,3.1110139146,-1.2307949146,-0.1889309695

C,0,4.2340079146,-1.0963209146,-1.1263399695  
 C,0,3.4207269146,-1.5417439146,1.2223340305  
 H,0,4.1400399146,-0.1853319146,-1.7211869695  
 H,0,5.1541379146,-1.0311459146,-0.5458689695  
 H,0,4.3050149146,-1.9628519146,-1.7925159695  
 H,0,3.5643599146,-2.6254799146,1.3292790305  
 C,0,1.5446719146,-0.7940399146,-2.0324449695  
 H,0,2.2923439146,0.0520310854,2.1356250305  
 H,0,2.5013389146,-1.3743759146,3.1624540305  
 H,0,4.3659569146,-1.0509299146,1.4680170305  
 H,0,1.6952249146,0.2901410854,-2.1712119695  
 H,0,2.1858749146,-1.3467539146,-2.7226059695  
 H,0.5023369146,-1.0190579146,-2.2570829695

### 3-tert-Butylhydroperoxycyclohexanone - 6-31G\* Gas Phase

E(RB+HF-LYP) = -617.499588925

|                                              |                             |
|----------------------------------------------|-----------------------------|
| Zero-point correction=                       | 0.271937 (Hartree/Particle) |
| Thermal correction to Energy=                | 0.286175                    |
| Thermal correction to Enthalpy=              | 0.287119                    |
| Thermal correction to Gibbs Free Energy=     | 0.230167                    |
| Sum of electronic and zero-point Energies=   | -617.227652                 |
| Sum of electronic and thermal Energies=      | -617.213414                 |
| Sum of electronic and thermal Enthalpies=    | -617.212470                 |
| Sum of electronic and thermal Free Energies= | -617.269422                 |

|       | E (Thermal)<br>KCal/Mol | CV<br>Cal/Mol-Kelvin | S<br>Cal/Mol-Kelvin |
|-------|-------------------------|----------------------|---------------------|
| Total | 179.577                 | 53.931               | 119.865             |

C,0,-0.2082626084,1.5757296991,1.4395737677  
 C,0,1.2443463653,1.3699834312,1.8874995072  
 C,0,2.2322231147,2.1438568235,0.9911788145  
 C,0,2.0099955034,1.866073017,-0.4895291744  
 C,0,0.5571098109,1.9327871165,-0.9581940138  
 C,0,-0.4048800636,1.1751473886,-0.0292816389  
 O,0,2.9215595296,1.6420022912,-1.2609805007  
 O,0,-0.0816237829,-0.2008999151,-0.2507348727  
 O,0,-1.0584445429,-0.9868308029,0.5090255164  
 C,0,-1.4657809575,-2.1127049523,-0.3061584993  
 C,0,-2.173382945,-1.6289823369,-1.5768026125  
 C,0,-0.2531198183,-2.9932097222,-0.6294119132  
 C,0,-2.4406801424,-2.8355259134,0.6319113739  
 H,0,0.2515079185,2.9891123968,-0.9623841121  
 H,0,-1.4448413831,1.3460105387,-0.338005399  
 H,0,-0.4989721138,2.6304171476,1.5514706131  
 H,0,-0.8880969924,0.9870113858,2.0626954063  
 H,0,1.3679261529,1.68496584,2.930116725  
 H,0,1.4793639128,0.3005607201,1.8465676078  
 H,0,2.0836849363,3.2249772353,1.1439418805  
 H,0,3.2752669385,1.9188766222,1.2322557013  
 H,0,-0.5674105165,-3.8914741127,-1.172753793  
 H,0,0.4670732054,-2.4509373743,-1.2476414788  
 H,0,0.2480034752,-3.3033063792,0.2934776163  
 H,0,-2.538993587,-2.4816052872,-2.1598243459  
 H,0,-3.0296853477,-0.995214379,-1.3212972002  
 H,0,-1.4873850476,-1.0545924746,-2.2050386172  
 H,0,-2.8291718932,-3.7343400653,0.1417817717  
 H,0,-1.937084217,-3.1348225288,1.5564965538  
 H,0,-3.2856337314,-2.1884813826,0.8891563198  
 H,0,0.4971091045,1.5597422032,-1.9842100599

**3-tert-Butylhydroperoxycyclohexanone - 6-31+G\*\* Gas Phase**

E(RB+HF-LYP) = -617.545699234

|                                              |                             |
|----------------------------------------------|-----------------------------|
| Zero-point correction=                       | 0.269910 (Hartree/Particle) |
| Thermal correction to Energy=                | 0.284254                    |
| Thermal correction to Enthalpy=              | 0.285198                    |
| Thermal correction to Gibbs Free Energy=     | 0.227904                    |
| Sum of electronic and zero-point Energies=   | -617.275789                 |
| Sum of electronic and thermal Energies=      | -617.261446                 |
| Sum of electronic and thermal Enthalpies=    | -617.260501                 |
| Sum of electronic and thermal Free Energies= | -617.317795                 |

|       | E (Thermal)<br>KCal/Mol | CV<br>Cal/Mol-Kelvin | S<br>Cal/Mol-Kelvin |
|-------|-------------------------|----------------------|---------------------|
| Total | 178.372                 | 54.380               | 120.585             |

C,0,-0.183259816,1.5627637924,1.4588934479  
 C,0,1.274542316,1.3508455338,1.8869814489  
 C,0,2.2543083871,2.1350640829,0.9904651262  
 C,0,2.0120019256,1.8932943201,-0.4909086363  
 C,0,0.5564261304,1.9411318851,-0.9456897961  
 C,0,-0.4022910763,1.1840064507,-0.0123581808  
 O,0,2.9208343431,1.7178601991,-1.2834493726  
 O,0,-0.1082389816,-0.1968822179,-0.2593256987  
 O,0,-1.0961811041,-0.978594171,0.493144476  
 C,0,-1.4771604985,-2.1281451846,-0.3098981683  
 C,0,-2.1676070272,-1.6739625189,-1.6009256695  
 C,0,-0.2489985817,-3.000268104,-0.5952362615  
 C,0,-2.4608490154,-2.8445968308,0.6239196662  
 H,0,0.2485483737,2.9963760415,-0.947247042  
 H,0,-1.4428595297,1.3742370842,-0.306901344  
 H,0,-0.4700879223,2.6164503988,1.5857004298  
 H,0,-0.8569081248,0.9696887394,2.0838692952  
 H,0,1.4094502202,1.6548372506,2.9308916035  
 H,0,1.510960701,0.2824631574,1.8335921018  
 H,0,2.114226065,3.214180477,1.1614825754  
 H,0,3.299165957,1.9016707817,1.2125120361  
 H,0,-0.5475914751,-3.9103241844,-1.1263952694  
 H,0,0.4755837826,-2.4636649153,-1.2122774737  
 H,0,0.2390498,-3.2889305849,0.3407611383  
 H,0,-2.5153911334,-2.5427488275,-2.1696713839  
 H,0,-3.0333855757,-1.04384271,-1.3726900516  
 H,0,-1.4769910146,-1.1082358449,-2.2310891822  
 H,0,-2.8299172936,-3.7538744645,0.1392853792  
 H,0,-1.9712720831,-3.125870451,1.5609033793  
 H,0,-3.3173300655,-2.2039242151,0.8550484498  
 H,0,0.4907587946,1.5716412247,-1.9721877411

**3-tert-Butylhydroperoxycyclohexanone - 6-31G\* – PCM Dichloroethane**

E(RB+HF-LYP) = -617.507326327

|                                              |                             |
|----------------------------------------------|-----------------------------|
| Zero-point correction=                       | 0.271406 (Hartree/Particle) |
| Thermal correction to Energy=                | 0.285591                    |
| Thermal correction to Enthalpy=              | 0.286536                    |
| Thermal correction to Gibbs Free Energy=     | 0.229988                    |
| Sum of electronic and zero-point Energies=   | -617.235921                 |
| Sum of electronic and thermal Energies=      | -617.221735                 |
| Sum of electronic and thermal Enthalpies=    | -617.220791                 |
| Sum of electronic and thermal Free Energies= | -617.277338                 |

|       | E (Thermal)<br>KCal/Mol | CV<br>Cal/Mol-Kelvin | S<br>Cal/Mol-Kelvin |
|-------|-------------------------|----------------------|---------------------|
| Total | 179.211                 | 53.947               | 119.014             |

C,0,-0.239571168,1.5901028417,1.399131551  
 C,0,1.2052583881,1.4600889618,1.8970473775  
 C,0,2.1903522428,2.2263612325,0.9898803048  
 C,0,2.0190033888,1.8686273337,-0.475996206  
 C,0,0.584985224,1.8639284651,-0.9894679564  
 C,0,-0.3810100391,1.1186629849,-0.0537066734  
 O,0,2.9649575136,1.6344514327,-1.2113560377  
 O,0,-0.0072379256,-0.2583554863,-0.2071409459  
 O,0,-0.9764272294,-1.053330703,0.5495393715  
 C,0,-1.4742180058,-2.1148996739,-0.3062355902  
 C,0,-2.2117102976,-1.5351306357,-1.5177246933  
 C,0,-0.3200982002,-3.0306106781,-0.7291420668  
 C,0,-2.4419912121,-2.8427792312,0.6349526332  
 H,0,0.2481628079,2.9096777081,-1.0475477474  
 H,0,-1.4143232771,1.2477254384,-0.4019991922  
 H,0,-0.5705364949,2.6371440595,1.4536938029  
 H,0,-0.9162732735,1.0055547425,2.0304402591  
 H,0,1.2886726771,1.8347254,2.9236985571  
 H,0,1.4835419273,0.4000016412,1.9188982128  
 H,0,1.9931654937,3.3068740061,1.0803044017  
 H,0,3.2334398956,2.0556249362,1.2748041027  
 H,0,-0.6994033781,-3.8799430476,-1.3084013709  
 H,0,0.3995637846,-2.4865712248,-1.3471218076  
 H,0,0.2016685967,-3.4177512808,0.1526602032  
 H,0,-2.6440511715,-2.3415345578,-2.1205535487  
 H,0,-3.0239466372,-0.8749911489,-1.1941416111  
 H,0,-1.5271886422,-0.9651716986,-2.15218678  
 H,0,-2.8904034998,-3.6961613816,0.115567889  
 H,0,-1.9162087348,-3.2140374821,1.5207530597  
 H,0,-3.2459632025,-2.1741755454,0.9602802291  
 H,0,0.5637423361,1.4447778839,-1.9999198457

### 3-tert-Butylhydroperoxycyclohexanone - 6-31+G\*\* – PCM Dichloroethane

E(RB+HF-LYP) = -617.507326327

|                                              |                             |
|----------------------------------------------|-----------------------------|
| Zero-point correction=                       | 0.271406 (Hartree/Particle) |
| Thermal correction to Energy=                | 0.285591                    |
| Thermal correction to Enthalpy=              | 0.286536                    |
| Thermal correction to Gibbs Free Energy=     | 0.229988                    |
| Sum of electronic and zero-point Energies=   | -617.235921                 |
| Sum of electronic and thermal Energies=      | -617.221735                 |
| Sum of electronic and thermal Enthalpies=    | -617.220791                 |
| Sum of electronic and thermal Free Energies= | -617.277338                 |

|       | E (Thermal) | CV             | S              |
|-------|-------------|----------------|----------------|
|       | KCal/Mol    | Cal/Mol-Kelvin | Cal/Mol-Kelvin |
| Total | 179.211     | 53.947         | 119.014        |

C,0,-0.239571168,1.5901028417,1.399131551  
 C,0,1.2052583881,1.4600889618,1.8970473775  
 C,0,2.1903522428,2.2263612325,0.9898803048  
 C,0,2.0190033888,1.8686273337,-0.475996206  
 C,0,0.584985224,1.8639284651,-0.9894679564  
 C,0,-0.3810100391,1.1186629849,-0.0537066734  
 O,0,2.9649575136,1.6344514327,-1.2113560377  
 O,0,-0.0072379256,-0.2583554863,-0.2071409459  
 O,0,-0.9764272294,-1.053330703,0.5495393715  
 C,0,-1.4742180058,-2.1148996739,-0.3062355902  
 C,0,-2.2117102976,-1.5351306357,-1.5177246933  
 C,0,-0.3200982002,-3.0306106781,-0.7291420668  
 C,0,-2.4419912121,-2.8427792312,0.6349526332  
 H,0,0.2481628079,2.9096777081,-1.0475477474

H,0,-1.4143232771,1.2477254384,-0.4019991922  
 H,0,-0.5705364949,2.6371440595,1.4536938029  
 H,0,-0.9162732735,1.0055547425,2.0304402591  
 H,0,1.2886726771,1.8347254,2.9236985571  
 H,0,1.4835419273,0.4000016412,1.9188982128  
 H,0,1.9931654937,3.3068740061,1.0803044017  
 H,0,3.2334398956,2.0556249362,1.2748041027  
 H,0,-0.6994033781,-3.8799430476,-1.3084013709  
 H,0,0.3995637846,-2.4865712248,-1.3471218076  
 H,0,0.2016685967,-3.4177512808,0.1526602032  
 H,0,-2.6440511715,-2.3415345578,-2.1205535487  
 H,0,-3.0239466372,-0.8749911489,-1.1941416111  
 H,0,-1.5271886422,-0.9651716986,-2.15218678  
 H,0,-2.8904034998,-3.6961613816,0.115567889  
 H,0,-1.9162087348,-3.2140374821,1.5207530597  
 H,0,-3.2459632025,-2.1741755454,0.9602802291  
 H,0,0.5637423361,1.4447778839,-1.9999198457

#### 4-methylcyclohexanone - 6-31G\* (23) – Gas Phase

E(RB+HF-LYP) = -347.980744335

|                                              |                             |
|----------------------------------------------|-----------------------------|
| Zero-point correction=                       | 0.156050 (Hartree/Particle) |
| Thermal correction to Energy=                | 0.163560                    |
| Thermal correction to Enthalpy=              | 0.164504                    |
| Thermal correction to Gibbs Free Energy=     | 0.124308                    |
| Sum of electronic and zero-point Energies=   | -347.824695                 |
| Sum of electronic and thermal Energies=      | -347.817185                 |
| Sum of electronic and thermal Enthalpies=    | -347.816241                 |
| Sum of electronic and thermal Free Energies= | -347.856437                 |

|       | E (Thermal) | CV             | S              |
|-------|-------------|----------------|----------------|
|       | KCal/Mol    | Cal/Mol-Kelvin | Cal/Mol-Kelvin |
| Total | 102.635     | 28.716         | 84.599         |

C,0,1.1433816996,-0.8306667622,-0.7395299599  
 C,0,1.2882869758,-0.3730695756,0.6606748757  
 O,0,2.0838156571,-1.3013899787,-1.3621464531  
 C,0,0.2694103419,0.1708578191,1.3477646884  
 H,0,2.2652852311,-0.5272332609,1.1119048551  
 C,0,-1.100121889,0.4365782326,0.7678127753  
 H,0,0.4194909833,0.4477260008,2.3919762562  
 C,0,-1.0408612492,0.464512258,-0.7697757737  
 H,0,-1.7504530945,-0.4023148929,1.0723949654  
 C,0,-1.710821402,1.7250663912,1.3422013502  
 C,0,-0.2567218083,-0.7273326899,-1.3348954015  
 H,0,-2.0564339386,0.4848613222,-1.183285482  
 H,0,-0.5538636378,1.3988800059,-1.0828214716  
 H,0,-0.780991019,-1.6655377967,-1.0944463058  
 H,0,-0.1657761198,-0.6857533773,-2.4246203906  
 H,0,-2.7153025075,1.8919097154,0.9375088309  
 H,0,-1.7919147028,1.6761344331,2.4342964847  
 H,0,-1.0958824648,2.5967736405,1.0887485554

#### 4-methylcyclohexanone - 6-31+G\*\* (23) – Gas Phase

E(RB+HF-LYP) = -348.009396968

|                                            |                             |
|--------------------------------------------|-----------------------------|
| Zero-point correction=                     | 0.155072 (Hartree/Particle) |
| Thermal correction to Energy=              | 0.162610                    |
| Thermal correction to Enthalpy=            | 0.163554                    |
| Thermal correction to Gibbs Free Energy=   | 0.123301                    |
| Sum of electronic and zero-point Energies= | -347.854325                 |

Sum of electronic and thermal Energies= -347.846787  
 Sum of electronic and thermal Enthalpies= -347.845843  
 Sum of electronic and thermal Free Energies= -347.886096

|       | E (Thermal)<br>KCal/Mol | CV<br>Cal/Mol-Kelvin | S<br>Cal/Mol-Kelvin |
|-------|-------------------------|----------------------|---------------------|
| Total | 102.039                 | 28.902               | 84.719              |

C,0,1.1400632479,-0.834609228,-0.7372552061  
 C,0,1.2911594603,-0.373285447,0.6602899178  
 O,0,2.0792070737,-1.3180921218,-1.358813902  
 C,0,0.2719902635,0.1777336548,1.3459295997  
 H,0,2.2671883781,-0.5280908334,1.1122553579  
 C,0,-1.0978757523,0.441575688,0.7670003285  
 H,0,0.425607335,0.4564032362,2.3887482321  
 C,0,-1.0401947168,0.4677761209,-0.7706086726  
 H,0,-1.7432632548,-0.4002158007,1.0731331877  
 C,0,-1.7136861602,1.7271041217,1.3438048909  
 C,0,-0.2546078609,-0.7227756002,-1.337764273  
 H,0,-2.0557775171,0.4838355995,-1.1829089688  
 H,0,-0.556745821,1.4030510621,-1.0854956806  
 H,0,-0.7780963185,-1.662396086,-1.1036036644  
 H,0,-0.1581703281,-0.6758780155,-2.4262408166  
 H,0,-2.719197168,1.8891124896,0.9412840489  
 H,0,-1.7928768141,1.6764840215,2.4352796062  
 H,0,-1.1034159708,2.6013154405,1.0896804022

#### 4-methylcyclohexanone - 6-31G\* (23) – PCM Dichloroethane

E(RB+HF-LYP) = -347.989066368

|                                              |                             |
|----------------------------------------------|-----------------------------|
| Zero-point correction=                       | 0.155427 (Hartree/Particle) |
| Thermal correction to Energy=                | 0.162939                    |
| Thermal correction to Enthalpy=              | 0.163884                    |
| Thermal correction to Gibbs Free Energy=     | 0.123705                    |
| Sum of electronic and zero-point Energies=   | -347.833640                 |
| Sum of electronic and thermal Energies=      | -347.826127                 |
| Sum of electronic and thermal Enthalpies=    | -347.825183                 |
| Sum of electronic and thermal Free Energies= | -347.865362                 |

|       | E (Thermal)<br>KCal/Mol | CV<br>Cal/Mol-Kelvin | S<br>Cal/Mol-Kelvin |
|-------|-------------------------|----------------------|---------------------|
| Total | 102.246                 | 28.759               | 84.564              |

C,0,1.1398854117,-0.8285043728,-0.7352892412  
 C,0,1.289515269,-0.3730669931,0.6585378103  
 O,0,2.0826850675,-1.3097501121,-1.3608497736  
 C,0,0.2680757345,0.1714205618,1.345989099  
 H,0,2.265901811,-0.5290211857,1.1158492643  
 C,0,-1.0993418167,0.4382375486,0.7665626595  
 H,0,0.4204350109,0.4424944326,2.393157612  
 C,0,-1.0415935739,0.4665666457,-0.7706573894  
 H,0,-1.746950693,-0.4034857614,1.0743016819  
 C,0,-1.7099098441,1.7265325427,1.3422086785  
 C,0,-0.2540138842,-0.7235591551,-1.3348810355  
 H,0,-2.0571734784,0.4785362316,-1.1839442562  
 H,0,-0.5584274184,1.402375745,-1.086471517  
 H,0,-0.77739545,-1.6632081758,-1.0946776718  
 H,0,-0.1630018213,-0.6804912379,-2.4254297566  
 H,0,-2.7163000088,1.8882141447,0.9400843376  
 H,0,-1.785854733,1.6771244013,2.4345879432  
 H,0,-1.0984175376,2.5997016355,1.0845170645

**4-methylcyclohexanone - 6-31+G\*\* (23) – PCM Dichloroethane**

E(RB+HF-LYP) = -348.019873307

|                                              |                             |
|----------------------------------------------|-----------------------------|
| Zero-point correction=                       | 0.154314 (Hartree/Particle) |
| Thermal correction to Energy=                | 0.161848                    |
| Thermal correction to Enthalpy=              | 0.162792                    |
| Thermal correction to Gibbs Free Energy=     | 0.122590                    |
| Sum of electronic and zero-point Energies=   | -347.865559                 |
| Sum of electronic and thermal Energies=      | -347.858026                 |
| Sum of electronic and thermal Enthalpies=    | -347.857082                 |
| Sum of electronic and thermal Free Energies= | -347.897283                 |

|       | E (Thermal)<br>KCal/Mol | CV<br>Cal/Mol-Kelvin | S<br>Cal/Mol-Kelvin |
|-------|-------------------------|----------------------|---------------------|
| Total | 101.561                 | 28.938               | 84.612              |

C,0,1.1355633089,-0.8315170423,-0.7319730056  
 C,0,1.2925892645,-0.3732973896,0.6574686685  
 O,0,2.0783627762,-1.3276120924,-1.357595329  
 C,0,0.2700486698,0.1780331543,1.3436939218  
 H,0,2.2678053035,-0.5303196264,1.1172795649  
 C,0,-1.0968344984,0.4435218187,0.7655454292  
 H,0,0.4261362137,0.4491041661,2.3905554502  
 C,0,-1.0413645412,0.4698633754,-0.7715495147  
 H,0,-1.7391295179,-0.4017984342,1.0760354845  
 C,0,-1.7122915229,1.7289197945,1.3437791142  
 C,0,-0.2512176136,-0.7182942277,-1.3375695455  
 H,0,-2.0570794983,0.4751069331,-1.1833583439  
 H,0,-0.5632010584,1.4071112577,-1.0901643053  
 H,0,-0.7735767161,-1.6597333752,-1.1031582957  
 H,0,-0.1553935315,-0.6695167738,-2.4270346122  
 H,0,-2.7194985475,1.8855965478,0.943299295  
 H,0,-1.7865980577,1.6774411317,2.4355118978  
 H,0,-1.1053252025,2.6045280126,1.0854260895

**Ts 1 from axial attack on methylcyclohexanone, methyl equatorial (16) – 6-31G\* – PCM Dichloroethane**

E(RB+HF-LYP) = -1002.15387621

|                                              |                             |
|----------------------------------------------|-----------------------------|
| Zero-point correction=                       | 0.478716 (Hartree/Particle) |
| Thermal correction to Energy=                | 0.504396                    |
| Thermal correction to Enthalpy=              | 0.505340                    |
| Thermal correction to Gibbs Free Energy=     | 0.421847                    |
| Sum of electronic and zero-point Energies=   | -1001.675160                |
| Sum of electronic and thermal Energies=      | -1001.649480                |
| Sum of electronic and thermal Enthalpies=    | -1001.648536                |
| Sum of electronic and thermal Free Energies= | -1001.732030                |

|       | E (Thermal)<br>KCal/Mol | CV<br>Cal/Mol-Kelvin | S<br>Cal/Mol-Kelvin |
|-------|-------------------------|----------------------|---------------------|
| Total | 316.513                 | 95.620               | 175.727             |

C,0,-2.1842099755,1.8030370877,1.4032740865  
 C,0,-0.7615362145,2.1501865956,1.8608758885  
 C,0,-0.1553594699,3.2632593493,0.9987781492  
 C,0,-0.3309917374,3.062246211,-0.5130127913  
 C,0,-1.3891285029,2.2185676291,-0.9513965079  
 C,0,-2.1763742538,1.4583055314,-0.0754765988  
 O,0,0.4294410062,3.6952131632,-1.2866471516  
 O,0,-1.2781716969,-0.2141007365,-0.2373842277  
 O,0,-1.648955662,-1.4730667735,0.4409164152

C,0,-2.2492252546,-2.3940285563,-0.4913454575  
 C,0,-3.5413877603,-1.8065959191,-1.0731062113  
 C,0,-1.2580288957,-2.7477033056,-1.6083304951  
 C,0,-2.5532922273,-3.6185970038,0.3820316345  
 H,0,-1.5285527471,2.1187088519,-2.0269076972  
 H,0,-3.1141753892,1.0580572034,-0.4538100633  
 H,0,-2.7882461323,2.7269073883,1.4743064136  
 C,0,-2.8580180702,0.7553504505,2.2962718753  
 H,0,-0.7658122989,2.4457495229,2.9188785236  
 H,0,-0.1495876611,1.2432386003,1.7823035249  
 H,0,-0.6296506952,4.2259494978,1.2500143821  
 H,0,0.9152446888,3.3935547587,1.1999821332  
 H,0,-1.6981975143,-3.4644393055,-2.3115085998  
 H,0,-0.9806892252,-1.8440362332,-2.1574470689  
 H,0,-0.3486414951,-3.1930972796,-1.1883746828  
 H,0,-4.0437838575,-2.5364184376,-1.719080117  
 H,0,-4.2288254938,-1.5264267062,-0.2673232812  
 H,0,-3.3180454094,-0.9156393104,-1.6657912508  
 H,0,-3.0171066502,-4.4101444702,-0.2172083666  
 H,0,-1.6334427822,-4.0161451158,0.8249135307  
 H,0,-3.238993673,-3.3518053302,1.1935808993  
 H,0,0.3312650327,-0.2301546637,-0.3408662741  
 N,0,1.3874273794,-0.2156172458,-0.4907571658  
 C,0,1.8787314915,0.5207810912,-1.6583034982  
 C,0,3.2483674435,-0.0161891262,-2.0591887097  
 H,0,1.1432898858,0.3864844618,-2.4566331478  
 H,0,1.9098135314,1.5927640122,-1.4309122597  
 C,0,2.1719845794,-0.8079172431,0.3864257155  
 N,0,3.5083484869,-0.7555789889,0.2873589484  
 C,0,4.4200558142,-1.3430505103,1.2675509039  
 C,0,4.1617482846,-0.059740033,-0.8378452562  
 H,0,4.9251800339,-2.2197276654,0.8444510735  
 H,0,5.177966906,-0.5994838427,1.5366223634  
 H,0,3.8937047517,-1.6362801851,2.1736609416  
 H,0,4.439955353,0.952410975,-0.5138004497  
 C,0,1.510850119,-1.5555099544,1.5137777757  
 H,0,3.1470720316,-1.024815239,-2.4779215246  
 H,0,3.6971573101,0.6207756744,-2.8278037005  
 H,0,5.0857010742,-0.6019283274,-1.0646037759  
 H,0,1.9154377158,-2.5692411898,1.5954080781  
 H,0,1.6829516389,-1.0453046088,2.468626939  
 H,0,0.4350719548,-1.6205150793,1.3327573061  
 H,0,-3.8852657349,0.5585578326,1.9640005512  
 H,0,-2.3182769614,-0.1932272159,2.2714756749  
 H,0,-2.9065706507,1.1152660794,3.3318341389

## Ts 1 from axial attack on methylcyclohexanone, methyl equatorial (16) – 6-31+G\*\* – PCM Dichloroethane

E(RB+HF-LYP) = -1002.23909138

|                                              |                             |
|----------------------------------------------|-----------------------------|
| Zero-point correction=                       | 0.474943 (Hartree/Particle) |
| Thermal correction to Energy=                | 0.499864                    |
| Thermal correction to Enthalpy=              | 0.500808                    |
| Thermal correction to Gibbs Free Energy=     | 0.420150                    |
| Sum of electronic and zero-point Energies=   | -1001.764149                |
| Sum of electronic and thermal Energies=      | -1001.739227                |
| Sum of electronic and thermal Enthalpies=    | -1001.738283                |
| Sum of electronic and thermal Free Energies= | -1001.818941                |

|       | E (Thermal) | CV             | S              |
|-------|-------------|----------------|----------------|
|       | KCal/Mol    | Cal/Mol-Kelvin | Cal/Mol-Kelvin |
| Total | 313.669     | 94.270         | 169.759        |

|    |   |   |           |           |           |
|----|---|---|-----------|-----------|-----------|
| 1  | 6 | 0 | 2.360268  | -1.104063 | 1.589092  |
| 2  | 6 | 0 | 1.295824  | -2.210130 | 1.569958  |
| 3  | 6 | 0 | 1.646551  | -3.311414 | 0.562653  |
| 4  | 6 | 0 | 2.086990  | -2.793627 | -0.807195 |
| 5  | 6 | 0 | 2.566463  | -1.460750 | -0.898980 |
| 6  | 6 | 0 | 2.587497  | -0.575093 | 0.185881  |
| 7  | 8 | 0 | 2.066930  | -3.599330 | -1.781663 |
| 8  | 8 | 0 | 1.041275  | 0.579934  | -0.198981 |
| 9  | 8 | 0 | 1.017177  | 1.922499  | 0.387783  |
| 10 | 6 | 0 | 1.278302  | 2.932887  | -0.616706 |
| 11 | 6 | 0 | 2.669565  | 2.739657  | -1.232896 |
| 12 | 6 | 0 | 0.191568  | 2.908673  | -1.700235 |
| 13 | 6 | 0 | 1.216588  | 4.236823  | 0.190166  |
| 14 | 1 | 0 | 2.904801  | -1.120317 | -1.876411 |
| 15 | 1 | 0 | 3.230794  | 0.297583  | 0.121748  |
| 16 | 1 | 0 | 3.322504  | -1.575584 | 1.864652  |
| 17 | 6 | 0 | 2.074497  | -0.026997 | 2.641156  |
| 18 | 1 | 0 | 1.182735  | -2.639598 | 2.573902  |
| 19 | 1 | 0 | 0.331821  | -1.757056 | 1.306106  |
| 20 | 1 | 0 | 2.478786  | -3.919672 | 0.950759  |
| 21 | 1 | 0 | 0.808611  | -4.002567 | 0.412482  |
| 22 | 1 | 0 | 0.365060  | 3.700340  | -2.437705 |
| 23 | 1 | 0 | 0.194078  | 1.945923  | -2.217604 |
| 24 | 1 | 0 | -0.797649 | 3.064959  | -1.256310 |
| 25 | 1 | 0 | 2.886122  | 3.542869  | -1.946219 |
| 26 | 1 | 0 | 3.439427  | 2.754782  | -0.453996 |
| 27 | 1 | 0 | 2.721930  | 1.784130  | -1.760566 |
| 28 | 1 | 0 | 1.399307  | 5.094741  | -0.465591 |
| 29 | 1 | 0 | 0.231913  | 4.360633  | 0.652741  |
| 30 | 1 | 0 | 1.973947  | 4.237668  | 0.980614  |
| 31 | 1 | 0 | -0.465018 | 0.114845  | -0.180365 |
| 32 | 7 | 0 | -1.475923 | -0.237681 | -0.282342 |
| 33 | 6 | 0 | -1.728840 | -1.221948 | -1.336758 |
| 34 | 6 | 0 | -3.157730 | -1.068499 | -1.846959 |
| 35 | 1 | 0 | -0.992949 | -1.054022 | -2.127307 |
| 36 | 1 | 0 | -1.565265 | -2.233174 | -0.942233 |
| 37 | 6 | 0 | -2.424064 | 0.223264  | 0.511397  |
| 38 | 7 | 0 | -3.697238 | -0.185533 | 0.404090  |
| 39 | 6 | 0 | -4.764021 | 0.244549  | 1.309894  |
| 40 | 6 | 0 | -4.124689 | -1.107996 | -0.668215 |
| 41 | 1 | 0 | -5.424677 | 0.964084  | 0.812367  |
| 42 | 1 | 0 | -5.353629 | -0.631707 | 1.597184  |
| 43 | 1 | 0 | -4.360895 | 0.694109  | 2.214571  |
| 44 | 1 | 0 | -4.200484 | -2.121020 | -0.250562 |
| 45 | 6 | 0 | -2.030561 | 1.232783  | 1.554897  |
| 46 | 1 | 0 | -3.260672 | -0.116974 | -2.382117 |
| 47 | 1 | 0 | -3.402691 | -1.873376 | -2.546358 |
| 48 | 1 | 0 | -5.128002 | -0.800961 | -0.981336 |
| 49 | 1 | 0 | -2.687358 | 2.106565  | 1.517991  |
| 50 | 1 | 0 | -2.103400 | 0.796514  | 2.557410  |
| 51 | 1 | 0 | -1.002754 | 1.556314  | 1.381202  |
| 52 | 1 | 0 | 2.846333  | 0.750189  | 2.632939  |
| 53 | 1 | 0 | 1.117301  | 0.464145  | 2.454259  |
| 54 | 1 | 0 | 2.053787  | -0.475404 | 3.641492  |

**Ts 1 from axial attack on methylcyclohexanone, methyl axial (17) – 6-31G\* – PCM  
Dichloroethane**

E(RB+HF-LYP) = -1002.15621553

Zero-point correction= 0.479138 (Hartree/Particle)  
Thermal correction to Energy= 0.504756

|                                              |              |
|----------------------------------------------|--------------|
| Thermal correction to Enthalpy=              | 0.505700     |
| Thermal correction to Gibbs Free Energy=     | 0.422256     |
| Sum of electronic and zero-point Energies=   | -1001.677077 |
| Sum of electronic and thermal Energies=      | -1001.651459 |
| Sum of electronic and thermal Enthalpies=    | -1001.650515 |
| Sum of electronic and thermal Free Energies= | -1001.733960 |

| Total |   | E (Thermal)         | CV                       |                           | S         |
|-------|---|---------------------|--------------------------|---------------------------|-----------|
|       |   | KCal/Mol<br>316.739 | Cal/Mol-Kelvin<br>95.380 | Cal/Mol-Kelvin<br>175.624 |           |
| 1     | 6 | 0                   | -2.361226                | 1.436353                  | 0.939529  |
| 2     | 6 | 0                   | -1.086820                | 1.930174                  | 1.646304  |
| 3     | 6 | 0                   | -0.462927                | 3.147352                  | 0.951667  |
| 4     | 6 | 0                   | -0.338003                | 3.002315                  | -0.570790 |
| 5     | 6 | 0                   | -1.233024                | 2.106370                  | -1.224416 |
| 6     | 6 | 0                   | -2.093028                | 1.246891                  | -0.537007 |
| 7     | 8 | 0                   | 0.496466                 | 3.720929                  | -1.171179 |
| 8     | 8 | 0                   | -1.141702                | -0.456962                 | -0.536525 |
| 9     | 8 | 0                   | -1.593186                | -1.498781                 | 0.384592  |
| 10    | 6 | 0                   | -2.170807                | -2.603793                 | -0.345884 |
| 11    | 6 | 0                   | -3.382436                | -2.133547                 | -1.159502 |
| 12    | 6 | 0                   | -1.112913                | -3.243425                 | -1.254603 |
| 13    | 6 | 0                   | -2.599793                | -3.567678                 | 0.767172  |
| 14    | 1 | 0                   | -1.182949                | 2.068215                  | -2.312175 |
| 15    | 1 | 0                   | -2.915025                | 0.804510                  | -1.094886 |
| 16    | 6 | 0                   | -3.562193                | 2.382206                  | 1.145245  |
| 17    | 1 | 0                   | -2.628977                | 0.457117                  | 1.352089  |
| 18    | 1 | 0                   | -1.301595                | 2.158118                  | 2.699423  |
| 19    | 1 | 0                   | -0.361999                | 1.107954                  | 1.639504  |
| 20    | 1 | 0                   | -1.064537                | 4.049904                  | 1.139802  |
| 21    | 1 | 0                   | 0.534524                 | 3.364383                  | 1.353250  |
| 22    | 1 | 0                   | -1.535897                | -4.080806                 | -1.821693 |
| 23    | 1 | 0                   | -0.732264                | -2.497601                 | -1.957436 |
| 24    | 1 | 0                   | -0.272912                | -3.621923                 | -0.660375 |
| 25    | 1 | 0                   | -3.864499                | -2.979876                 | -1.662951 |
| 26    | 1 | 0                   | -4.119938                | -1.656001                 | -0.504561 |
| 27    | 1 | 0                   | -3.069265                | -1.409854                 | -1.916328 |
| 28    | 1 | 0                   | -3.056406                | -4.467260                 | 0.339635  |
| 29    | 1 | 0                   | -1.736819                | -3.873645                 | 1.368855  |
| 30    | 1 | 0                   | -3.330118                | -3.090385                 | 1.429572  |
| 31    | 1 | 0                   | 0.443047                 | -0.356593                 | -0.373625 |
| 32    | 7 | 0                   | 1.509566                 | -0.253566                 | -0.388117 |
| 33    | 6 | 0                   | 2.079078                 | 0.490562                  | -1.514174 |
| 34    | 6 | 0                   | 3.512127                 | 0.030121                  | -1.757601 |
| 35    | 1 | 0                   | 1.439985                 | 0.298789                  | -2.380747 |
| 36    | 1 | 0                   | 2.026270                 | 1.566163                  | -1.307279 |
| 37    | 6 | 0                   | 2.230017                 | -0.773841                 | 0.583674  |
| 38    | 7 | 0                   | 3.564358                 | -0.640718                 | 0.623997  |
| 39    | 6 | 0                   | 4.400636                 | -1.146035                 | 1.711144  |
| 40    | 6 | 0                   | 4.292032                 | 0.067765                  | -0.446632 |
| 41    | 1 | 0                   | 5.015984                 | -1.983839                 | 1.361665  |
| 42    | 1 | 0                   | 5.064073                 | -0.344036                 | 2.052570  |
| 43    | 1 | 0                   | 3.798932                 | -1.474630                 | 2.555984  |
| 44    | 1 | 0                   | 4.475607                 | 1.101718                  | -0.123980 |
| 45    | 6 | 0                   | 1.498976                 | -1.531652                 | 1.660112  |
| 46    | 1 | 0                   | 3.513534                 | -0.990986                 | -2.157448 |
| 47    | 1 | 0                   | 4.001725                 | 0.677409                  | -2.491935 |
| 48    | 1 | 0                   | 5.264583                 | -0.422518                 | -0.560195 |
| 49    | 1 | 0                   | 1.922301                 | -2.533800                 | 1.783693  |
| 50    | 1 | 0                   | 1.579741                 | -1.010870                 | 2.621074  |
| 51    | 1 | 0                   | 0.442263                 | -1.624258                 | 1.396627  |
| 52    | 1 | 0                   | -4.457093                | 1.998920                  | 0.639777  |
| 53    | 1 | 0                   | -3.797297                | 2.479493                  | 2.212483  |

54            1            0            -3.363239       3.383854       0.747921

### Ts 1 from axial attack on methylcyclohexanone, methyl axial (17) – 6-31+G\*\* – PCM Dichloroethane

E(RB+HF-LYP) = -1002.24132823

|                                              |                             |
|----------------------------------------------|-----------------------------|
| Zero-point correction=                       | 0.475325 (Hartree/Particle) |
| Thermal correction to Energy=                | 0.500304                    |
| Thermal correction to Enthalpy=              | 0.501248                    |
| Thermal correction to Gibbs Free Energy=     | 0.420099                    |
| Sum of electronic and zero-point Energies=   | -1001.766004                |
| Sum of electronic and thermal Energies=      | -1001.741024                |
| Sum of electronic and thermal Enthalpies=    | -1001.740080                |
| Sum of electronic and thermal Free Energies= | -1001.821229                |

| Total | E (Thermal) |   | CV             |           | S              |
|-------|-------------|---|----------------|-----------|----------------|
|       | KCal/Mol    |   | Cal/Mol-Kelvin |           | Cal/Mol-Kelvin |
|       | 313.946     |   | 94.190         |           | 170.793        |
| 1     | 6           | 0 | 2.441810       | -1.285610 | 0.973612       |
| 2     | 6           | 0 | 1.213521       | -1.940950 | 1.627120       |
| 3     | 6           | 0 | 0.744166       | -3.197826 | 0.880325       |
| 4     | 6           | 0 | 0.672964       | -3.034917 | -0.639156      |
| 5     | 6           | 0 | 1.448412       | -2.008884 | -1.242858      |
| 6     | 6           | 0 | 2.198025       | -1.084258 | -0.504550      |
| 7     | 8           | 0 | -0.020441      | -3.863840 | -1.294291      |
| 8     | 8           | 0 | 1.078327       | 0.522375  | -0.501199      |
| 9     | 8           | 0 | 1.459954       | 1.609664  | 0.398141       |
| 10    | 6           | 0 | 1.944349       | 2.758224  | -0.342074      |
| 11    | 6           | 0 | 3.183389       | 2.388213  | -1.166228      |
| 12    | 6           | 0 | 0.832629       | 3.317747  | -1.239619      |
| 13    | 6           | 0 | 2.305322       | 3.752629  | 0.769152       |
| 14    | 1           | 0 | 1.429861       | -1.944143 | -2.330028      |
| 15    | 1           | 0 | 2.979894       | -0.542081 | -1.029164      |
| 16    | 6           | 0 | 3.741888       | -2.087114 | 1.199084       |
| 17    | 1           | 0 | 2.583429       | -0.293837 | 1.417201       |
| 18    | 1           | 0 | 1.427897       | -2.181634 | 2.676696       |
| 19    | 1           | 0 | 0.401645       | -1.205281 | 1.628770       |
| 20    | 1           | 0 | 1.421851       | -4.042765 | 1.073388       |
| 21    | 1           | 0 | -0.242954      | -3.519300 | 1.233318       |
| 22    | 1           | 0 | 1.181795       | 4.205221  | -1.779170      |
| 23    | 1           | 0 | 0.523754       | 2.564468  | -1.968851      |
| 24    | 1           | 0 | -0.038940      | 3.601230  | -0.639618      |
| 25    | 1           | 0 | 3.588453       | 3.275385  | -1.665789      |
| 26    | 1           | 0 | 3.962758       | 1.970145  | -0.520365      |
| 27    | 1           | 0 | 2.925863       | 1.648994  | -1.928856      |
| 28    | 1           | 0 | 2.676718       | 4.686196  | 0.333497       |
| 29    | 1           | 0 | 1.428175       | 3.984397  | 1.382210       |
| 30    | 1           | 0 | 3.083871       | 3.340814  | 1.419540       |
| 31    | 1           | 0 | -0.488810      | 0.345766  | -0.357833      |
| 32    | 7           | 0 | -1.549257      | 0.187584  | -0.381989      |
| 33    | 6           | 0 | -2.082083      | -0.511701 | -1.553411      |
| 34    | 6           | 0 | -3.528615      | -0.090014 | -1.786668      |
| 35    | 1           | 0 | -1.444254      | -0.257682 | -2.404149      |
| 36    | 1           | 0 | -2.003660      | -1.594894 | -1.399698      |
| 37    | 6           | 0 | -2.301148      | 0.596373  | 0.621284       |
| 38    | 7           | 0 | -3.627379      | 0.393080  | 0.640318       |
| 39    | 6           | 0 | -4.492312      | 0.774300  | 1.757561       |
| 40    | 6           | 0 | -4.321466      | -0.251124 | -0.493755      |
| 41    | 1           | 0 | -5.117028      | 1.632017  | 1.482248       |
| 42    | 1           | 0 | -5.144732      | -0.070005 | 2.002136       |
| 43    | 1           | 0 | -3.912708      | 1.024463  | 2.643078       |

|    |   |   |           |           |           |
|----|---|---|-----------|-----------|-----------|
| 44 | 1 | 0 | -4.477975 | -1.311587 | -0.254175 |
| 45 | 6 | 0 | -1.616781 | 1.306129  | 1.757908  |
| 46 | 1 | 0 | -3.563288 | 0.955610  | -2.115388 |
| 47 | 1 | 0 | -3.982695 | -0.702456 | -2.571462 |
| 48 | 1 | 0 | -5.306247 | 0.219022  | -0.582551 |
| 49 | 1 | 0 | -2.089909 | 2.273484  | 1.951525  |
| 50 | 1 | 0 | -1.676062 | 0.711175  | 2.675726  |
| 51 | 1 | 0 | -0.566454 | 1.469759  | 1.509749  |
| 52 | 1 | 0 | 4.596538  | -1.590394 | 0.725381  |
| 53 | 1 | 0 | 3.955634  | -2.170416 | 2.271233  |
| 54 | 1 | 0 | 3.676884  | -3.099217 | 0.785521  |

### Ts 1 from equatorial attack on methylcyclohexanone, methyl equatorial (18) – 6-31+G\*\* – PCM Dichloroethane

E(RB+HF-LYP) = -1002.23994315

|                                              |                             |
|----------------------------------------------|-----------------------------|
| Zero-point correction=                       | 0.475475 (Hartree/Particle) |
| Thermal correction to Energy=                | 0.501407                    |
| Thermal correction to Enthalpy=              | 0.502351                    |
| Thermal correction to Gibbs Free Energy=     | 0.416572                    |
| Sum of electronic and zero-point Energies=   | -1001.764469                |
| Sum of electronic and thermal Energies=      | -1001.738536                |
| Sum of electronic and thermal Enthalpies=    | -1001.737592                |
| Sum of electronic and thermal Free Energies= | -1001.823372                |

|       |   |   | E (Thermal) | CV             | S              |
|-------|---|---|-------------|----------------|----------------|
|       |   |   | KCal/Mol    | Cal/Mol-Kelvin | Cal/Mol-Kelvin |
| Total |   |   | 314.637     | 96.134         | 180.538        |
| 1     | 6 | 0 | -2.188929   | 1.585649       | 0.982730       |
| 2     | 6 | 0 | -1.486108   | 2.886577       | 1.410193       |
| 3     | 6 | 0 | -0.100218   | 3.025198       | 0.771275       |
| 4     | 6 | 0 | -0.169016   | 2.948772       | -0.753173      |
| 5     | 6 | 0 | -1.194653   | 2.139470       | -1.306329      |
| 6     | 6 | 0 | -2.023691   | 1.327728       | -0.512489      |
| 7     | 8 | 0 | 0.670653    | 3.600689       | -1.437252      |
| 8     | 8 | 0 | -1.131034   | -0.368671      | -0.569546      |
| 9     | 8 | 0 | -1.604086   | -1.399560      | 0.356049       |
| 10    | 6 | 0 | -2.240383   | -2.490557      | -0.355776      |
| 11    | 6 | 0 | -3.460136   | -1.989393      | -1.138124      |
| 12    | 6 | 0 | -1.231526   | -3.175403      | -1.287476      |
| 13    | 6 | 0 | -2.666993   | -3.432794      | 0.777413       |
| 14    | 1 | 0 | -1.257250   | 2.072776       | -2.391571      |
| 15    | 1 | 0 | -2.894742   | 0.899556       | -0.999766      |
| 16    | 6 | 0 | -3.673984   | 1.598738       | 1.381162       |
| 17    | 1 | 0 | -1.715952   | 0.746973       | 1.507149       |
| 18    | 1 | 0 | -2.101884   | 3.745508       | 1.107274       |
| 19    | 1 | 0 | -1.412034   | 2.921332       | 2.505083       |
| 20    | 1 | 0 | 0.378155    | 3.971908       | 1.046058       |
| 21    | 1 | 0 | 0.560321    | 2.219591       | 1.126271       |
| 22    | 1 | 0 | -1.696158   | -4.024538      | -1.801019      |
| 23    | 1 | 0 | -0.871111   | -2.468482      | -2.039171      |
| 24    | 1 | 0 | -0.372942   | -3.546201      | -0.717077      |
| 25    | 1 | 0 | -3.973279   | -2.827473      | -1.622890      |
| 26    | 1 | 0 | -4.169458   | -1.492901      | -0.467853      |
| 27    | 1 | 0 | -3.151699   | -1.279658      | -1.909940      |
| 28    | 1 | 0 | -3.161749   | -4.318522      | 0.365050       |
| 29    | 1 | 0 | -1.797316   | -3.762490      | 1.355154       |
| 30    | 1 | 0 | -3.364526   | -2.930745      | 1.455516       |
| 31    | 1 | 0 | 0.461590    | -0.367068      | -0.389359      |
| 32    | 7 | 0 | 1.529204    | -0.338770      | -0.386319      |
| 33    | 6 | 0 | 2.177018    | 0.181607       | -1.593481      |

|    |   |   |           |           |           |
|----|---|---|-----------|-----------|-----------|
| 34 | 6 | 0 | 3.573041  | -0.417242 | -1.721714 |
| 35 | 1 | 0 | 1.544355  | -0.084351 | -2.444586 |
| 36 | 1 | 0 | 2.214177  | 1.276617  | -1.543335 |
| 37 | 6 | 0 | 2.196136  | -0.728474 | 0.683340  |
| 38 | 7 | 0 | 3.534690  | -0.668485 | 0.741911  |
| 39 | 6 | 0 | 4.312466  | -1.040498 | 1.924970  |
| 40 | 6 | 0 | 4.335587  | -0.218936 | -0.415881 |
| 41 | 1 | 0 | 4.815032  | -2.001967 | 1.767123  |
| 42 | 1 | 0 | 5.072245  | -0.272615 | 2.100371  |
| 43 | 1 | 0 | 3.684703  | -1.105965 | 2.810816  |
| 44 | 1 | 0 | 4.603610  | 0.836064  | -0.269275 |
| 45 | 6 | 0 | 1.399831  | -1.245902 | 1.850148  |
| 46 | 1 | 0 | 3.500529  | -1.487330 | -1.950158 |
| 47 | 1 | 0 | 4.119649  | 0.062647  | -2.539080 |
| 48 | 1 | 0 | 5.262443  | -0.801610 | -0.416731 |
| 49 | 1 | 0 | 1.762146  | -2.230778 | 2.159439  |
| 50 | 1 | 0 | 1.487334  | -0.569285 | 2.707235  |
| 51 | 1 | 0 | 0.348671  | -1.330358 | 1.569066  |
| 52 | 1 | 0 | -4.151276 | 0.639134  | 1.156982  |
| 53 | 1 | 0 | -3.785800 | 1.789340  | 2.455097  |
| 54 | 1 | 0 | -4.219950 | 2.384771  | 0.844235  |

### Table of Absolute and Relative Energies

| gas phase, 6-31G*       | HF         | E + zpe    | Erel vs sep SMs | G est (25) | Grel vs sep SMs |                 |                 |
|-------------------------|------------|------------|-----------------|------------|-----------------|-----------------|-----------------|
| tBuOOH                  | -308.80215 | -308.66261 |                 | -308.69353 |                 |                 |                 |
| dbu model (9)           | -345.35894 | -345.17863 |                 | -345.21114 |                 |                 |                 |
| dbumod - HOOtBu complex | -654.1814  | -653.85938 | <b>-11.4</b>    | -653.90684 | <b>-1.4</b>     |                 |                 |
| cyclohexenone           | -308.66613 | -308.53818 |                 | -308.56809 |                 | Erel vs complex | Grel vs complex |
| ts Ax A (10)            | -962.82403 | -962.37139 | <b>5.0</b>      | -962.42461 | <b>30.2</b>     | <b>16.4</b>     | <b>31.6</b>     |
| ts Ax B                 | -962.82376 | -962.37101 | <b>5.3</b>      | -962.42383 | <b>30.7</b>     | <b>16.7</b>     | <b>32.1</b>     |
| ts Eq A                 | -962.82071 | -962.36814 | <b>7.1</b>      | -962.42265 | <b>31.4</b>     | <b>18.5</b>     | <b>32.8</b>     |
| ts Eq B (13)            | -962.82235 | -962.36962 | <b>6.2</b>      | -962.42296 | <b>31.2</b>     | <b>17.5</b>     | <b>32.6</b>     |
| ts gauche               | -962.8204  | -962.36736 | <b>7.6</b>      | -962.42035 | <b>32.9</b>     | <b>19.0</b>     | <b>34.2</b>     |
| int Ax A (11)           | -962.8277  | -962.37341 | <b>3.8</b>      | -962.42699 | <b>28.7</b>     | <b>15.2</b>     | <b>30.1</b>     |
| int Ax B                | 962.82696  | -962.37288 | <b>4.1</b>      | -962.42668 | <b>28.9</b>     | <b>15.5</b>     | <b>30.3</b>     |
| int Eq A                | -962.82571 | -962.37184 | <b>4.8</b>      | -962.42698 | <b>28.7</b>     | <b>16.1</b>     | <b>30.1</b>     |
| int Eq B (14)           | -962.82502 | -962.37115 | <b>5.2</b>      | -962.42511 | <b>29.9</b>     | <b>16.6</b>     | <b>31.3</b>     |
| int gauche              | -962.82588 | -962.3709  | <b>5.3</b>      | -962.42312 | <b>31.1</b>     | <b>16.7</b>     | <b>32.5</b>     |
| ts2 Ax A (12)           | -962.82277 | -962.3705  | <b>5.6</b>      | -962.42427 | <b>30.4</b>     | <b>17.0</b>     | <b>31.8</b>     |
| ts2 Eq A                | -962.81723 | -962.36566 | <b>8.6</b>      | -962.42086 | <b>32.6</b>     | <b>20.0</b>     | <b>33.9</b>     |
| ts2 Eq B (15)           | -962.81886 | -962.36646 | <b>8.1</b>      | -962.4204  | <b>32.9</b>     | <b>19.5</b>     | <b>34.2</b>     |
| t-BuOO-cyclohexanone    | -617.49959 | -617.22765 | <b>-16.9</b>    | -617.26942 | <b>-4.9</b>     | <b>-5.5</b>     | <b>-3.5</b>     |
| gas phase, 6-31+G**     | HF         | E + zpe    | Erel vs sep SMs | G est (25) | Grel vs sep SMs |                 |                 |
| tBuOOH                  | -308.83468 | -308.69606 |                 | -308.72706 |                 |                 |                 |
| dbu model (9)           | -345.38627 | -345.20726 |                 | -345.23982 |                 |                 |                 |

|                            |            |                |                            |                   |                            |                    |                    |
|----------------------------|------------|----------------|----------------------------|-------------------|----------------------------|--------------------|--------------------|
| dbumod - HOOtBu<br>complex | -654.23711 | -653.91758     | <b>-8.9</b>                | -653.96645        | <b>0.3</b>                 |                    |                    |
|                            |            |                |                            |                   |                            | Erel vs<br>complex | Grel vs<br>complex |
| cyclohexenone              | -308.69105 | -308.56388     |                            | -308.59381        |                            |                    |                    |
| ts Ax A (10)               | -962.90069 | -962.45176     | <b>9.7</b>                 | -962.50677        | <b>33.8</b>                | <b>18.6</b>        | <b>33.6</b>        |
| ts Ax B                    | -962.90057 | -962.45155     | <b>9.8</b>                 | -962.50552        | <b>34.6</b>                | <b>18.8</b>        | <b>34.4</b>        |
| ts Eq A                    | -962.89824 | -962.44934     | <b>11.2</b>                | -962.50399        | <b>35.6</b>                | <b>20.2</b>        | <b>35.3</b>        |
| ts Eq B (13)               | -962.89927 | -962.44994     | <b>10.8</b>                | -962.50398        | <b>35.6</b>                | <b>19.8</b>        | <b>35.3</b>        |
| ts gauche                  | -962.89729 | -962.44708     | <b>12.6</b>                | -962.50059        | <b>37.7</b>                | <b>21.6</b>        | <b>37.4</b>        |
| int Ax A (11)              | -962.90386 | -962.45286     | <b>9.0</b>                 | -962.50716        | <b>33.6</b>                | <b>17.9</b>        | <b>33.3</b>        |
| int Ax B                   | -962.90489 | -962.4545      | <b>8.0</b>                 | -962.5095         | <b>32.1</b>                | <b>16.9</b>        | <b>31.9</b>        |
| int Eq A                   | -962.90205 | -962.45171     | <b>9.7</b>                 | -962.50745        | <b>33.4</b>                | <b>18.7</b>        | <b>33.1</b>        |
| int Eq B (14)              | -962.9014  | -962.45082     | <b>10.3</b>                | -962.50552        | <b>34.6</b>                | <b>19.2</b>        | <b>34.3</b>        |
| int gauche                 | -962.90168 | -962.4502      | <b>10.7</b>                | -962.50375        | <b>35.7</b>                | <b>19.6</b>        | <b>35.5</b>        |
| ts2 Ax A (12)              | -962.8998  | -962.45094     | <b>10.2</b>                | -962.50511        | <b>34.9</b>                | <b>19.2</b>        | <b>34.6</b>        |
| ts2 Eq A                   | -962.89531 | -962.44708     | <b>12.6</b>                | -962.50286        | <b>36.3</b>                | <b>21.6</b>        | <b>36.0</b>        |
| ts2 Eq B (15)              | -962.89664 | -962.44814     | <b>12.0</b>                | -962.50371        | <b>35.8</b>                | <b>20.9</b>        | <b>35.5</b>        |
| t-BuOO-<br>cyclohexanone   | -617.5457  | -617.27579     | <b>-9.9</b>                | -617.3178         | <b>1.9</b>                 | <b>-1.0</b>        | <b>1.7</b>         |
| <b>PCM, 6-31G*</b>         | <b>HF</b>  | <b>E + zpe</b> | <b>Erel vs<br/>sep SMs</b> | <b>G est (25)</b> | <b>Grel vs<br/>sep SMs</b> |                    |                    |
| tBuOOH                     | -308.81112 | -308.67223     |                            | -308.70304        |                            |                    |                    |
| dbu model (9)              | -345.36498 | -345.18494     |                            | -345.21754        |                            |                    |                    |
| dbumod - HOOtBu<br>complex | -654.18942 | -653.86848     | <b>-7.1</b>                | -653.91477        | <b>3.6</b>                 |                    |                    |
|                            |            |                |                            |                   |                            | Erel vs<br>complex | Grel vs<br>complex |
| cyclohexenone              | -308.6744  | -308.54703     |                            | -308.57692        |                            |                    |                    |
| ts Ax A (10)               | -962.84328 | -962.39251     | <b>7.3</b>                 | -962.44772        | <b>31.2</b>                | <b>14.4</b>        | <b>27.6</b>        |
| ts Ax B                    | -962.84183 | -962.39121     | <b>8.2</b>                 | -962.44764        | <b>31.3</b>                | <b>15.2</b>        | <b>27.6</b>        |
| ts Eq A                    | -962.83877 | -962.38809     | <b>10.1</b>                | -962.44467        | <b>33.2</b>                | <b>17.2</b>        | <b>29.5</b>        |
| ts Eq B (13)               | -962.84034 | -962.38903     | <b>9.5</b>                 | -962.44411        | <b>33.5</b>                | <b>16.6</b>        | <b>29.9</b>        |
| ts gauche                  | -962.83898 | -962.38771     | <b>10.3</b>                | -962.44316        | <b>34.1</b>                | <b>17.4</b>        | <b>30.5</b>        |
| int Ax A (11)              | -962.84922 | -962.39601     | <b>5.1</b>                 | -962.45148        | <b>28.9</b>                | <b>12.2</b>        | <b>25.2</b>        |
| int Ax B                   | -962.84819 | -962.39561     | <b>5.4</b>                 | -962.4548         | <b>26.8</b>                | <b>12.5</b>        | <b>23.2</b>        |
| int Eq A                   | -962.84996 | -962.39753     | <b>4.2</b>                 | -962.45404        | <b>27.3</b>                | <b>11.3</b>        | <b>23.6</b>        |
| int Eq B (14)              | -962.84474 | -962.3913      | <b>8.1</b>                 | -962.44666        | <b>31.9</b>                | <b>15.2</b>        | <b>28.3</b>        |
| int gauche                 | -962.84514 | -962.39068     | <b>8.5</b>                 | -962.44344        | <b>33.9</b>                | <b>15.6</b>        | <b>30.3</b>        |
| ts2 Ax A (12)              | -962.84303 | -962.39177     | <b>7.8</b>                 | -962.44766        | <b>31.3</b>                | <b>14.9</b>        | <b>27.6</b>        |
| ts2 Ax B                   | -962.84444 | -962.39286     | <b>7.1</b>                 | -962.44823        | <b>30.9</b>                | <b>14.2</b>        | <b>27.3</b>        |
| ts2 Eq A                   | -962.83996 | -962.38853     | <b>9.8</b>                 | -962.44445        | <b>33.3</b>                | <b>16.9</b>        | <b>29.6</b>        |
| ts2 Eq B (15)              | -962.83939 | -962.38805     | <b>10.1</b>                | -962.44333        | <b>34.0</b>                | <b>17.2</b>        | <b>30.3</b>        |
| t-BuOO-<br>cyclohexanone   | -617.50733 | -617.23592     | <b>-10.5</b>               | -617.27734        | <b>1.6</b>                 | <b>-3.4</b>        | <b>-2.0</b>        |
| <b>PCM, 6-31+G**</b>       | <b>HF</b>  | <b>E + zpe</b> | <b>Erel vs<br/>sep SMs</b> | <b>G est (25)</b> | <b>Grel vs<br/>sep SMs</b> |                    |                    |
| tBuOOH                     | -308.84483 | -308.70704     |                            | -308.73789        |                            |                    |                    |
| dbu model (9)              | -345.3937  | -345.21495     |                            | -345.24762        |                            |                    |                    |
| dbumod - HOOtBu<br>complex | -654.24751 | -653.92875     | <b>-4.2</b>                | -653.9766         | <b>5.6</b>                 |                    |                    |
|                            |            |                |                            |                   |                            | Erel vs<br>complex | Grel vs<br>complex |
| cyclohexenone              | -308.70146 | -308.575       |                            | -308.60491        |                            |                    |                    |

|                      |            |            |             |            |             |             |             |
|----------------------|------------|------------|-------------|------------|-------------|-------------|-------------|
| ts Ax A (10)         | -962.92499 | -962.47762 | <b>12.1</b> | -962.53128 | <b>37.1</b> | <b>16.4</b> | <b>31.5</b> |
| ts Ax B              | -962.92456 | -962.47751 | <b>12.2</b> | -962.53163 | <b>36.9</b> | <b>16.5</b> | <b>31.3</b> |
| ts Eq A              | -962.92137 | -962.47415 | <b>14.3</b> | -962.52882 | <b>38.7</b> | <b>18.6</b> | <b>33.1</b> |
| ts Eq B (13)         | -962.92215 | -962.47451 | <b>14.1</b> | -962.53099 | <b>37.3</b> | <b>18.3</b> | <b>31.7</b> |
| ts gauche            | -962.92167 | -962.47432 | <b>14.2</b> | -962.53134 | <b>37.1</b> | <b>18.5</b> | <b>31.5</b> |
| int Ax A (11)        | -962.93282 | -962.48276 | <b>8.9</b>  | -962.53856 | <b>32.5</b> | <b>13.2</b> | <b>26.9</b> |
| int Ax B             | -962.93109 | -962.48135 | <b>9.8</b>  | -962.53678 | <b>33.7</b> | <b>14.1</b> | <b>28.1</b> |
| int Eq A             | -962.92901 | -962.47962 | <b>10.9</b> | -962.53544 | <b>34.5</b> | <b>15.1</b> | <b>28.9</b> |
| int Eq B (14)        | -962.92682 | -962.47708 | <b>12.5</b> | -962.53189 | <b>36.7</b> | <b>16.7</b> | <b>31.1</b> |
| int gauche           | -962.92619 | -962.47585 | <b>13.3</b> | -962.53101 | <b>37.3</b> | <b>17.5</b> | <b>31.7</b> |
| ts2 Ax A (12)        | -962.92686 | -962.47886 | <b>11.4</b> | -962.53225 | <b>36.5</b> | <b>15.6</b> | <b>30.9</b> |
| ts2 Ax B             | -962.92726 | -962.47937 | <b>11.0</b> | -962.53265 | <b>36.2</b> | <b>15.3</b> | <b>30.7</b> |
| ts2 Eq A             | -962.92316 | -962.47502 | <b>13.8</b> | -962.52812 | <b>39.1</b> | <b>18.0</b> | <b>33.5</b> |
| ts2 Eq B (15)        | -962.92227 | -962.47409 | <b>14.4</b> | -962.53348 | <b>35.7</b> | <b>18.6</b> | <b>30.1</b> |
| t-BuOO-cyclohexanone | -617.5556  | -617.28626 | <b>-2.7</b> | -617.32758 | <b>9.6</b>  | <b>1.6</b>  | <b>4.0</b>  |

## Isotope Effect Results and Calculations

**$^{13}\text{C}$  Results.** For the  $^{13}\text{C}$  spectra of cyclohexenone the integration of the C6 methylene ring carbon was set at 1000. The average integrations and standard deviations (in parentheses) for the other carbons are shown in Table 1 along with the number of spectra recorded for each sample (n).

**Table 1.** Average  $^{13}\text{C}$  integrations for cyclohexenone, with standard deviations (in parentheses).

| % conversion        | <u>C=O</u>       | <u>-CH=CH-</u>   | <u>-CH=CH-</u>   | O=C- <u>CH<sub>2</sub></u> | <u>-CH<sub>2</sub>-CH<sub>2</sub></u> | <u>=CH-CH<sub>2</sub></u> | n |
|---------------------|------------------|------------------|------------------|----------------------------|---------------------------------------|---------------------------|---|
| Cyclohexenone       |                  |                  |                  |                            |                                       |                           |   |
| Standard 1 400 MHz  | 866.35<br>(8.0)  | 972.25<br>(8.2)  | 945.51<br>(5.2)  | 1000                       | 1005.63<br>(5.1)                      | 1009.24<br>(3.5)          | 6 |
| Exp. 1A (89.1 ± 3%) | 861.90<br>(13.4) | 1044.11<br>(5.9) | 965.74<br>(8.8)  | 1000                       | 996.30<br>(5.2)                       | 1020.08<br>(2.7)          | 6 |
| Exp. 2A (83.4 ± 3%) | 871.24<br>(9.9)  | 1019.89<br>(4.9) | 960.82<br>(5.1)  | 1000                       | 1004.63<br>(2.9)                      | 1011.98<br>(5.5)          | 6 |
| Standard 2 500 MHz  | 765.22<br>(1.1)  | 1031.66<br>(4.4) | 1022.46<br>(3.2) | 1000                       | 990.08<br>(2.3)                       | 988.54<br>(2.9)           | 5 |
| Exp. 1B (89.1 ± 3%) | 802.77<br>(3.1)  | 1097.52<br>(2.9) | 1044.80<br>(3.1) | 1000                       | 997.53<br>(4.1)                       | 1006.67<br>(2.1)          | 5 |
| Exp. 2B (83.4 ± 3%) | 790.19<br>(4.1)  | 1100.65<br>(5.7) | 1041.03<br>(7.2) | 1000                       | 981.61<br>(5.1)                       | 992.29<br>(4.9)           | 5 |

The values for  $R/R_0$ , calculated as the ratio of average integrations in Table 1 relative to standard, are shown in Table 2. The standard deviations were calculated from the formula:

$$\Delta R / R_0 = R / R_0 \times ((\Delta \text{IntSample} / \text{IntSample})^2 + (\Delta \text{IntStandard} / \text{IntStandard})^2)^{1/2} \quad (1)$$

**Table 2.**  $R/R_0$  for  $^{13}\text{C}$ .

|                 | <u>C=O</u> | <u>-CH=CH-</u> | <u>-CH=CH-</u> | O=C- <u>CH<sub>2</sub></u> | <u>-CH<sub>2</sub>-CH<sub>2</sub></u> | <u>=CH-CH<sub>2</sub></u> |
|-----------------|------------|----------------|----------------|----------------------------|---------------------------------------|---------------------------|
| Cyclohexenone   |            |                |                | assumed                    |                                       |                           |
| Exp. 1A $R/R_0$ | 0.995      | 1.074          | 1.021          | 1.000                      | 0.991                                 | 1.011                     |
| Standard dev    | 0.008      | 0.007          | 0.005          | 0                          | 0.003                                 | 0.002                     |
| Exp. 1B $R/R_0$ | 1.006      | 1.049          | 1.016          | 1.000                      | 0.999                                 | 1.003                     |
| Standard dev    | 0.008      | 0.007          | 0.004          | 0                          | 0.003                                 | 0.003                     |
| Exp. 2A $R/R_0$ | 1.049      | 1.064          | 1.021          | 1.000                      | 1.008                                 | 1.018                     |
| Standard dev    | 0.003      | 0.004          | 0.002          | 0                          | 0.002                                 | 0.002                     |
| Exp. 2B $R/R_0$ | 1.032      | 1.067          | 1.018          | 1.000                      | 0.991                                 | 1.004                     |
| Standard dev    | 0.004      | 0.006          | 0.005          | 0                          | 0.003                                 | 0.003                     |

The  $^{13}\text{C}$  KIEs for cyclohexenone were then calculated from eq. 2, with the standard deviations calculated from eq. 3, 4, and 5. All of these equations are taken from: Singleton, D. A.; Thomas, A. A. *J. Am. Chem. Soc.* **1995**, 117, 9357, its Supporting Information, and references therein.

$$\text{KIE}_{\text{calcd}} = \frac{\ln(1-F)}{\ln[(1-F)R/R_0]} \quad (2)$$

$$\Delta\text{KIE}_F = \frac{\partial\text{KIE}}{\partial F} \Delta F = \frac{-\ln(R/R_0)}{(1-F)\ln^2[(1-F)R/R_0]} \Delta F \quad (3)$$

$$\Delta\text{KIE}_R = \frac{\partial\text{KIE}}{\partial(R/R_0)} \Delta(R/R_0) = \frac{-\ln(1-F)}{(R/R_0)\ln^2[(1-F)R/R_0]} \Delta(R/R_0) \quad (4)$$

$$\Delta\text{KIE} = \text{KIE} * ((\Delta\text{KIE}_R/\text{KIE})^2 + (\Delta\text{KIE}_F/\text{KIE})^2)^{1/2} \quad (5)$$

**Table 3.**  $^{13}\text{C}$  KIEs.

|                      | <u>C</u> =O | <u>C</u> H=CH- | -CH= <u>C</u> H- | O=C- <u>C</u> H <sub>2</sub> | -CH <sub>2</sub> - <u>C</u> H <sub>2</sub> | =CH- <u>C</u> H <sub>2</sub> |
|----------------------|-------------|----------------|------------------|------------------------------|--------------------------------------------|------------------------------|
| Cyclohexenone        |             |                |                  | assumed                      |                                            |                              |
| Exp. 1A (89.1 ± 3%)  | 0.998 (8)   | 1.033 (7)      | 1.010 (5)        | 1.000                        | 0.996 (3)                                  | 1.004 (2)                    |
| Exp. 1B (83.4 ± 3%)  | 1.003 (8)   | 1.027 (7)      | 1.010 (4)        | 1.000                        | 0.999 (3)                                  | 1.002 (3)                    |
| Exp. 2A (89.1 ± 3%)* | 1.022 (3)   | 1.028 (4)      | 1.010 (2)        | 1.000                        | 1.003 (2)                                  | 1.008 (2)                    |
| Exp. 2B (83.4 ± 3%)* | 1.018 (4)   | 1.037 (6)      | 1.010 (5)        | 1.000                        | 0.995 (3)                                  | 1.002 (3)                    |

\* Due to time constraints, the recycle time was only 30 s. This did not allow for adequate relaxation of the carbonyl center, but was adequate for all other positions.
